# Supplementary material for: Theoretical studies of the function switch and mechanism of AceK as a highly active ATPase
Source: Royal Society of Chemistry journal article supplement (doi:10.1039/c6ra11873a), 2016-01-01
Supplement: c6ra11873a1.pdf [file c6ra11873a1.pdf]

## Supporting Information for “Theoretical studies of function switch and mechanism of AceK as a highly active ATPase”

Jiajia Qin<sup>a</sup>, Hongwei Tan<sup>a,\*</sup>, Xichen Li<sup>a,\*</sup>, Guangju Chen<sup>a</sup>, Jimin Zheng<sup>a</sup>, Ye Wang<sup>a</sup>,  
Jianqiu Ma<sup>a</sup> and Zongchao Jia<sup>b,a</sup>

<sup>a</sup> College of Chemistry, Beijing Normal University, Beijing, 100875 Beijing, China.

<sup>b</sup> Department of Biomedical and Molecular Sciences, Queen's University, Kingston,  
Ontario, Canada K7L 3N6.

\* Correspondence should be addressed to hongwei.tan@bnu.edu.cn or  
xcli@bnu.edu.cn

### Table of contents

|                                                                                                   |      |
|---------------------------------------------------------------------------------------------------|------|
| Supplementary computational analyses.....                                                         | S2   |
| Investigations of water wire effect on ATPase reaction.....                                       | S2   |
| Investigations of the number of Mg <sup>2+</sup> in active center on ATPase activity of AceK..... | S3   |
| Further discussion of ATPase and kinase activities of AceK.....                                   | S4   |
| Scheme S1, Figure S1-S4, Table S1-S5: .....                                                       | S5   |
| References.....                                                                                   | S16  |
| Cartesian coordinates of reactants, transition structures and products.....                       | S17  |
| Energy corrections of reactants, transition structures and products .....                         | S106 |

## Supplementary computational analyses

### Investigations of water wire effect on ATPase reaction

Extensive studies have found that it would be more effective to utilize more than one water molecule to relay and complete proton transfer in hydrolysis reaction.<sup>1-6</sup> Because in AceK the room between  $\gamma$ -phosphoryl and the proton acceptor Asp457 is able to accommodate two lytic water molecules, we also studied the two-water hydrolysis mechanism of AceK. Similar to that in the single-water mechanism, we found that the dissociative pathway is the favorable one in the two-water mechanism. The calculated energy barriers for associative and dissociative mechanisms are 31.21 kcal·mol<sup>-1</sup> and 21.33 kcal·mol<sup>-1</sup>, respectively. The geometries of reactants, transition states and products are depicted in Figure S2 and key structural parameters are listed in Table S2.

In the two-lytic-water pathway, the second water molecule acts as a bridge between the lytic water and Asp457. When the OH<sub>wat1</sub> of the lytic water attacks the  $\gamma$ -phosphates of ATP, a proton is transferred to the bridge water, which gives out another proton to Asp457 at the same time (Scheme S1). Comparing to that of Model<sub>1-wat</sub>, the calculated 21.33 kcal·mol<sup>-1</sup> energy barrier indicates that the two-lytic-water pathway for ATPase reaction is energetically unfavorable. For the dissociative structures of the two-lytic-water pathway, the strong hydrogen bonding interaction between the lytic water and O <sub>$\gamma$ 2</sub> of ATP (O<sub>wat1</sub>-O <sub>$\gamma$ 2</sub>ATP=2.82 Å) in reactant hinders the movement and nucleophilic attacking of the lytic water, which may contribute to a

higher energy barrier. Furthermore, although there is room to accommodate two water between ATP and Asp457, one more water causes extra steric conflicts in the active site, which would also be a reason of slowing ATP hydrolysis. In conclusion, the dissociative mechanism with one lytic water is the most reasonable and energetically favorable pathway for ATPase reaction.

### **Investigations of the number of $Mg^{2+}$ in active center on ATPase activity of AceK**

It is well known that one important role played by AceK in the cell is its kinase function. Typical kinases such as ePKs usually contain two  $Mg^{2+}$  ions (or other metal ions) in their active sites. AceK, however, contains only one  $Mg^{2+}$  ion in its active site.

Similar to our previous work on kinase and phosphatase of AceK<sup>7, 8</sup>, we further investigated ATP hydrolysis using a double- $Mg^{2+}$  model of AceK. In this case, the second  $Mg^{2+}$  ion was manually added in the active site with the similar position observed in ePKs. The added  $Mg^{2+}$  ion is coordinated with  $\gamma$ -phosphates of ATP and the carboxylate group of Asp457 to balance the local negative charges. In addition, three water molecules are included to complete the coordination of the second  $Mg^{2+}$  ion. The final model has a net charge of +1. Similarly, the ATP hydrolysis reaction was analyzed for both associative and dissociative pathways. The geometries of reactants, transition states and products are depicted in Figure S3 and key structural parameters are listed in Table S3.

Our results show that the added  $Mg^{2+}$  severely hinders ATP hydrolysis with higher energy barriers of  $45.91 \text{ kcal}\cdot\text{mol}^{-1}$  for associative mechanism and  $29.16 \text{ kcal}\cdot\text{mol}^{-1}$

for the dissociative one. Note that the unique single  $Mg^{2+}$  ion in ATPase stabilizes the reactant, transition state and product by its octahedral coordination with  $\alpha$ -,  $\beta$ - and  $\gamma$ -phosphoryl groups of ATP, Asn462, Asp475 and one water molecule, same as reported in our kinase study. In the double- $Mg^{2+}$  model, the active site is unable to fully accommodate the octahedral coordination for the second  $Mg^{2+}$  ion throughout the reaction. Furthermore, the added  $Mg^{2+}$  also makes the space more crowded for the ATP hydrolysis and makes this reaction more difficult to happen.

### **Further discussion of ATPase and kinase activities of AceK**

AceK integrates kinase, phosphatase and ATPase activities at the same active site. Because AceK possesses much higher ATPase activity than the other two activities, it seems reasonable that ATP hydrolysis is the main source for ADP which is essential for its phosphatase activity. In order to gain deeper understanding, the Mulliken charges of critical atoms were analyzed for both ATPase model and kinase model (Table S5). Clearly,  $P_\gamma$  of reactant is more positive in ATPase model than that in kinase model, while  $O_{wat}$  of reactant in ATPase model is more negative than  $O_{ser113}$  in the kinase model. The stronger electrophilicity of the  $\gamma$ -phosphates in ATP and nucleophilicity of the lytic water may enable AceK to have much higher ATPase activity than its kinase activity.

## Scheme S1, Figure S1-S4, Table S1-S5:

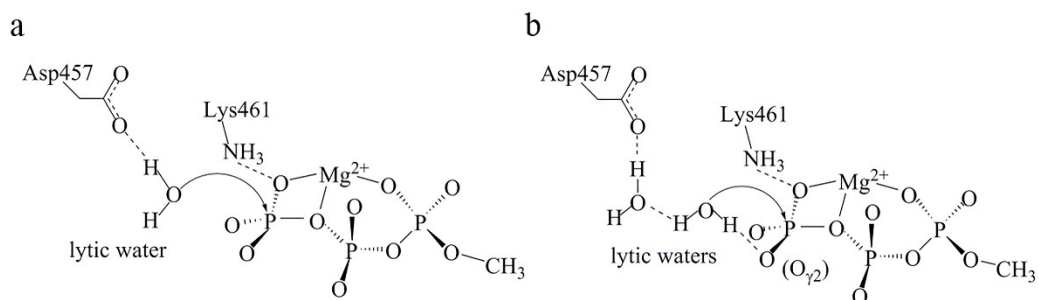

**Scheme S1. Schematic diagram of proton transfers.** a. A direct proton transfer path with one lytic water. b. Water-assisted proton transfer path.

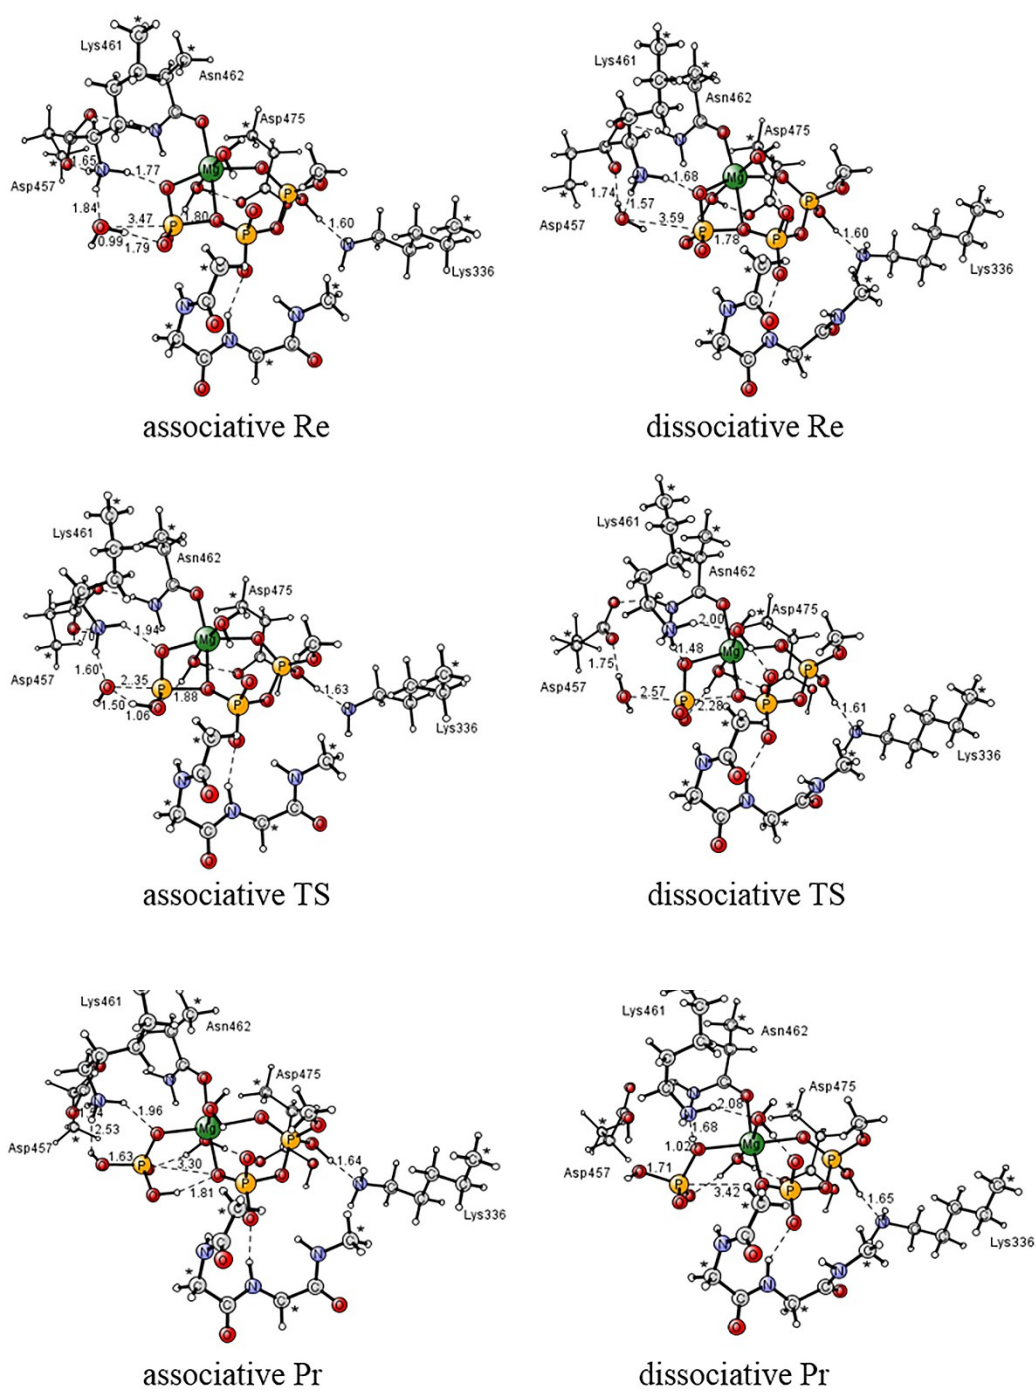

**Figure S1. The optimized structures of Re, TS and Pr for the Model<sub>2-wat</sub> of AceK. Main-chain carbons are marked with asterisks.**

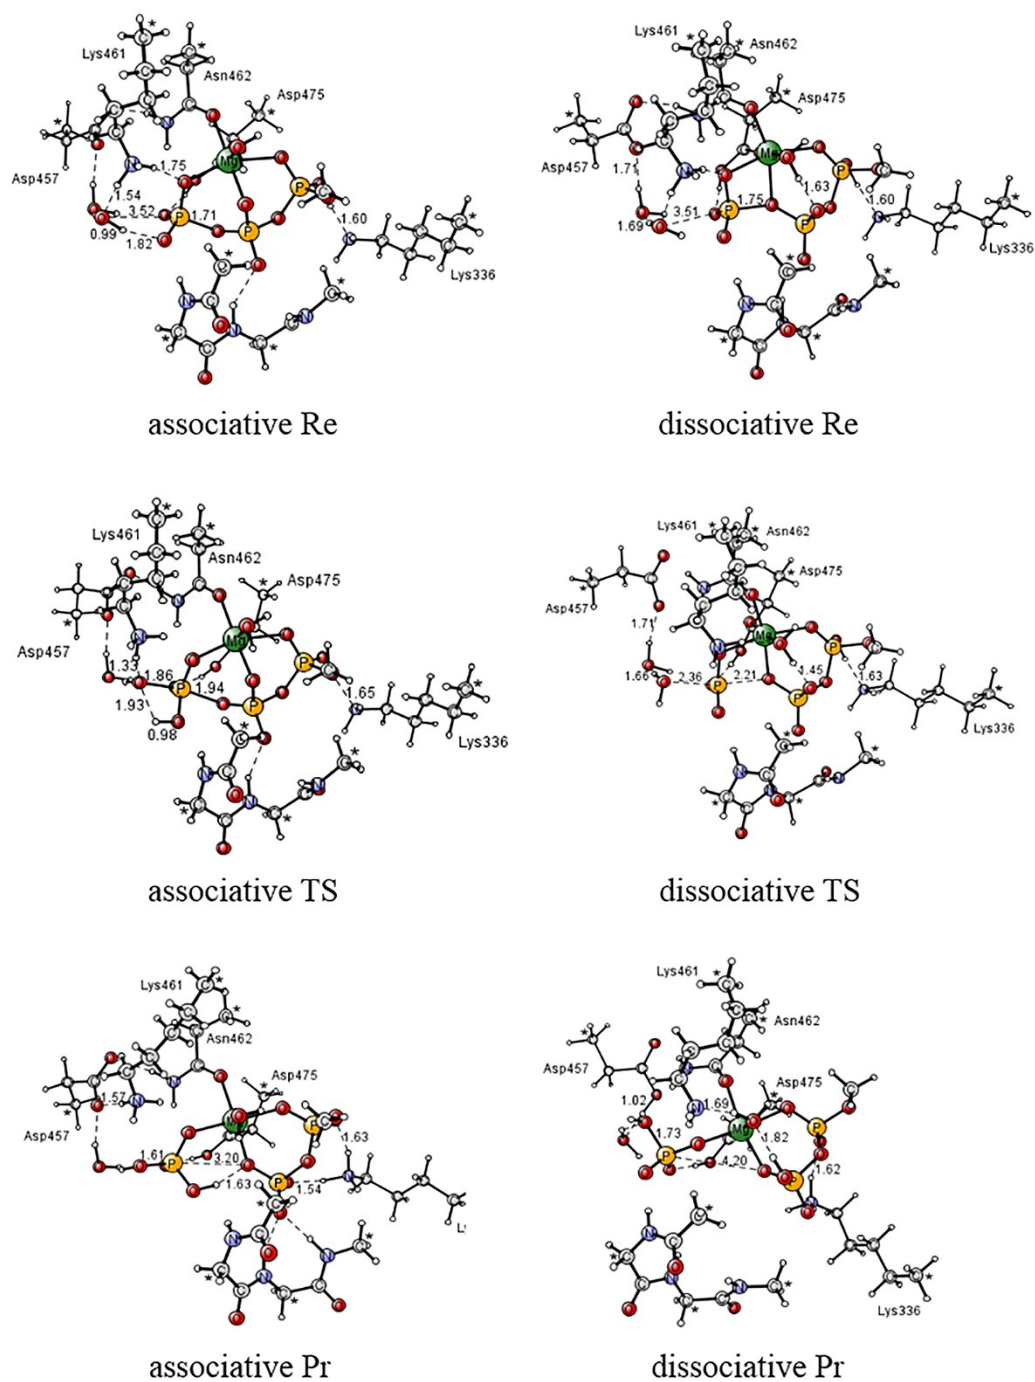

**Figure S2.** The optimized structures of Re, TS and Pr for the Model<sub>1-wat</sub> of AceK with one more lytic water. Main-chain carbons are marked with asterisks.

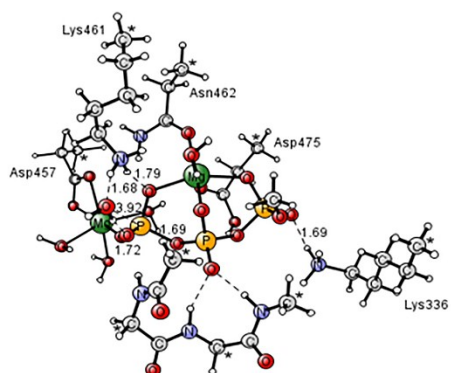

associative Re

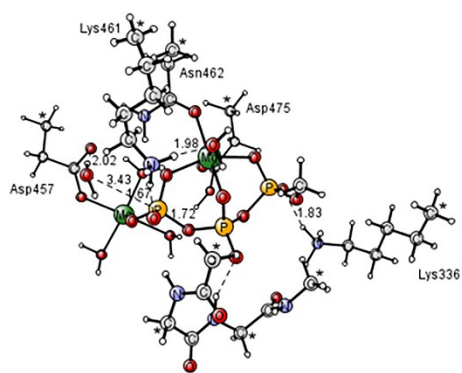

dissociative Re

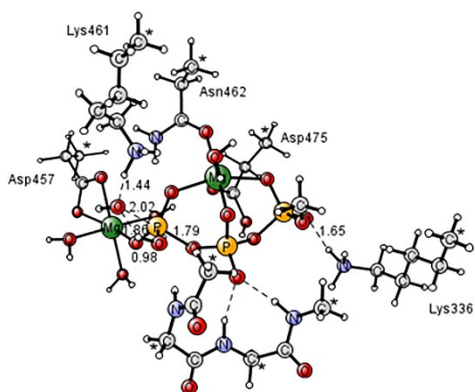

associative TS

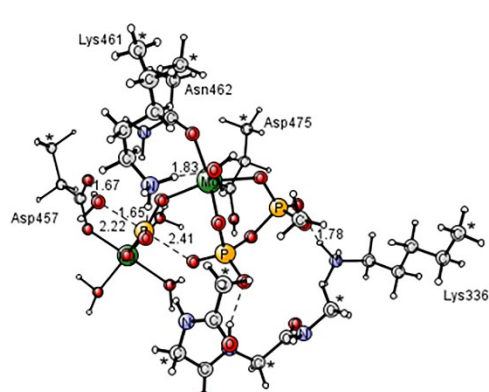

dissociative TS

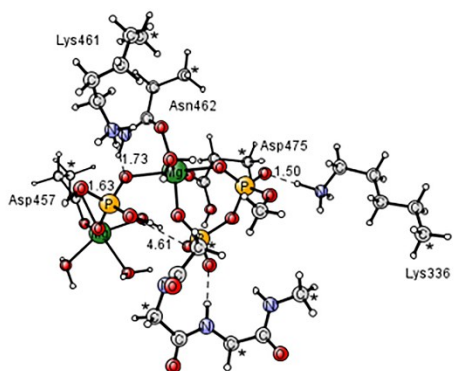

associative Pr

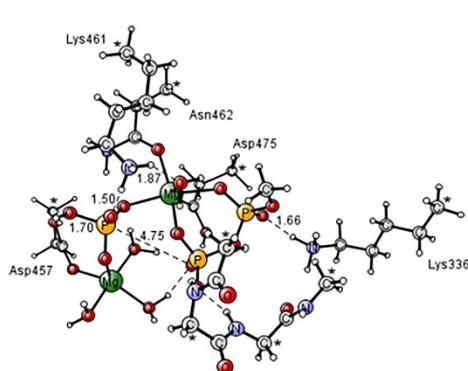

dissociative Pr

**Figure S3. The optimized structures of Re, TS and Pr for the double-Mg<sup>2+</sup> model of AceK. Main-chain carbons are identified with asterisks.**



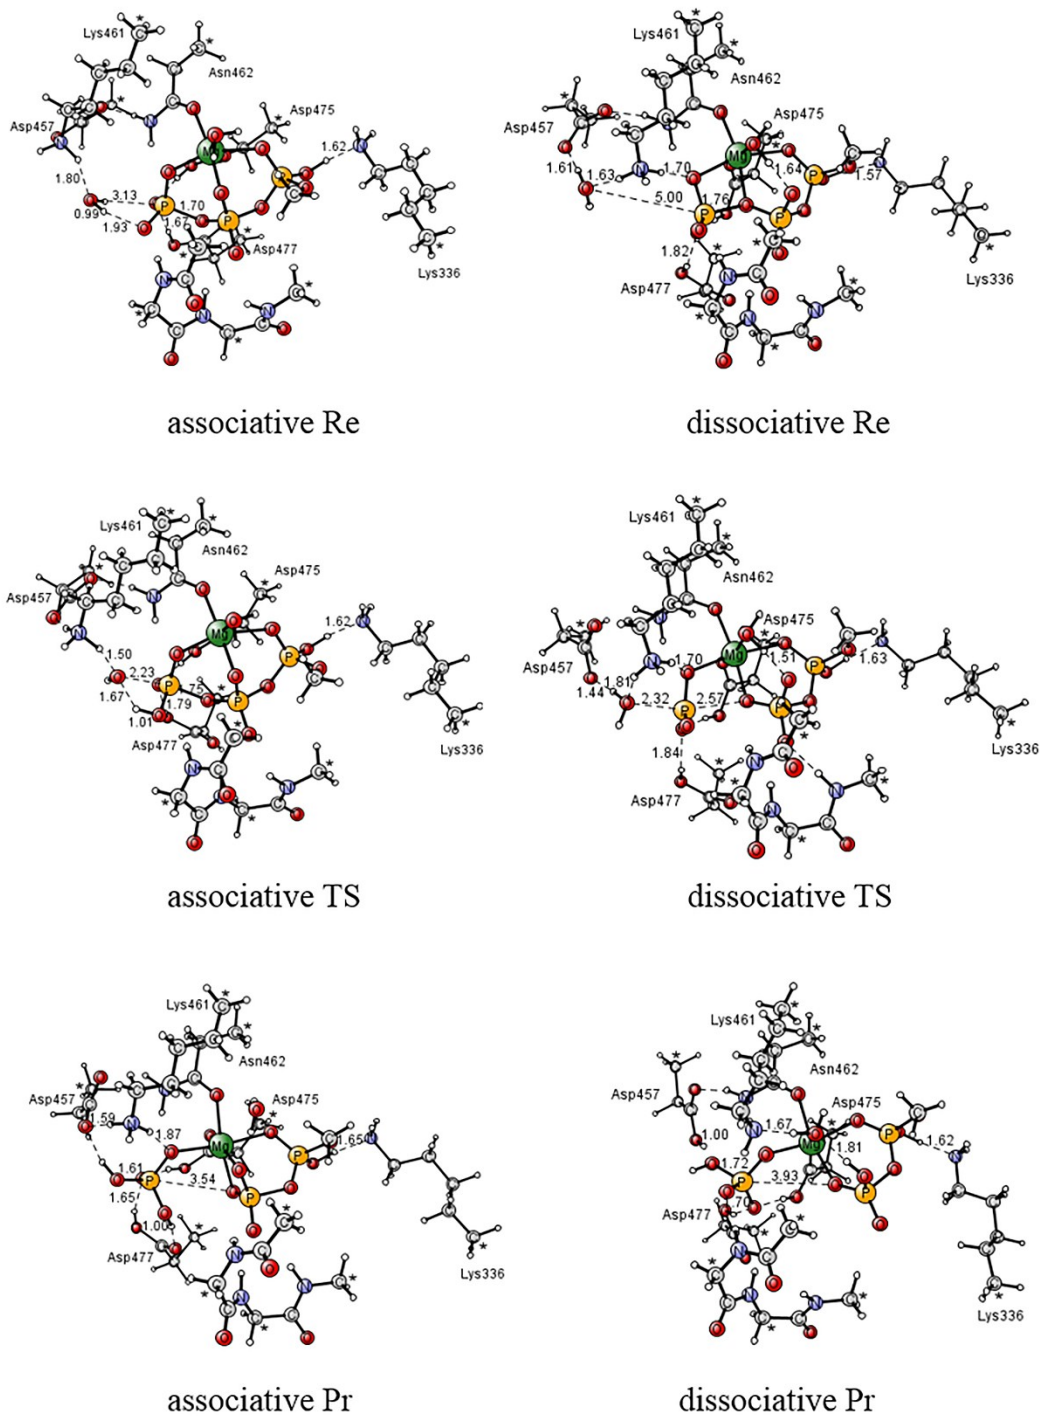

**Figure S4.** The optimized structures of Re, TS and Pr for the model extracted from AceK-ICDH complex. Main-chain carbons are identified with asterisks.

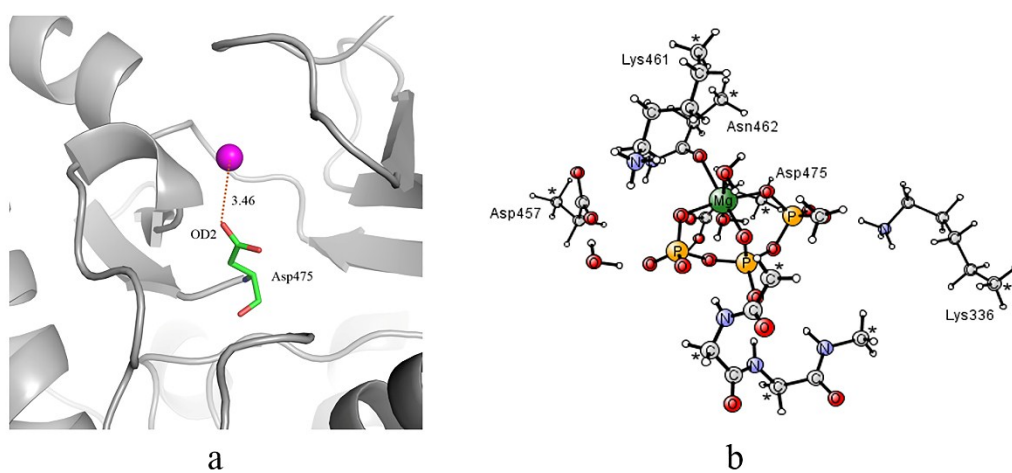

**Figure S5. A close-up view of Mg<sup>2+</sup> with Asp475 (a) and geometry structure of Model<sub>2-wat</sub> (b) for AceK. Main-chain carbons are identified with asterisks.**

**Table S1. Important bond lengths (Å) of Re, TS and Pr for Model<sub>2-wat</sub> of AceK.**

|                                        | associative |      |      | dissociative |      |      |
|----------------------------------------|-------------|------|------|--------------|------|------|
|                                        | Re          | TS   | Pr   | Re           | TS   | Pr   |
| O <sub>βγ</sub> ATP-P <sub>γ</sub> ATP | 1.80        | 1.88 | 3.30 | 1.78         | 2.28 | 3.42 |
| O <sub>wat</sub> -P <sub>γ</sub> ATP   | 3.47        | 2.35 | 1.63 | 3.59         | 2.57 | 1.71 |
| O <sub>Asp457</sub> -H <sub>wat</sub>  |             |      |      | 1.74         | 1.75 | 1.00 |
| H <sub>wat</sub> -O <sub>γ2</sub> ATP  | 1.79        | 1.06 | 0.99 |              |      |      |

**Table S2. Important bond lengths (Å) of Re, TS and Pr for Model<sub>1-wat</sub> of AceK with one more lytic water.**

|                                        | associative |      |      | dissociative |      |      |
|----------------------------------------|-------------|------|------|--------------|------|------|
|                                        | Re          | TS   | Pr   | Re           | TS   | Pr   |
| O <sub>βγ</sub> ATP-P <sub>γ</sub> ATP | 1.71        | 1.94 | 3.20 | 1.75         | 2.21 | 4.20 |
| O <sub>wat1</sub> -P <sub>γ</sub> ATP  | 3.52        | 1.86 | 1.61 | 3.51         | 2.36 | 1.73 |
| H <sub>wat1</sub> -O <sub>wat2</sub>   |             |      |      | 1.69         | 1.66 | 0.98 |
| O <sub>Asp457</sub> -H <sub>wat2</sub> |             |      |      | 1.71         | 1.71 | 1.02 |
| H <sub>wat1</sub> -O <sub>γ2</sub> ATP | 1.82        | 0.98 | 1.01 |              |      |      |

**Table S3. Important bond lengths ( $\text{\AA}$ ) of Re, TS and Pr for the double- $\text{Mg}^{2+}$  model of AceK.**

|                                                                | associative |      |      | dissociative |      |      |
|----------------------------------------------------------------|-------------|------|------|--------------|------|------|
|                                                                | Re          | TS   | Pr   | Re           | TS   | Pr   |
| $\text{O}_{\beta\gamma}\text{ATP}-\text{P}_{\gamma}\text{ATP}$ | 1.69        | 1.79 | 4.61 | 1.72         | 2.41 | 4.75 |
| $\text{O}_{\text{wat}}-\text{P}_{\gamma}\text{ATP}$            | 3.92        | 2.02 | 1.63 | 3.43         | 2.22 | 1.70 |
| $\text{O}_{\text{Asp457}}-\text{H}_{\text{wat}}$               |             |      |      | 2.02         | 1.67 | 1.00 |
| $\text{H}_{\text{wat}}-\text{O}_{\gamma 2}\text{ATP}$          | 1.72        | 0.98 | 1.00 |              |      |      |

**Table S4. Important bond lengths (Å) of Re, TS and Pr for the model extracted from AceK-ICDH complex.**

|                                    | associative |      |      | dissociative |      |      |
|------------------------------------|-------------|------|------|--------------|------|------|
|                                    | Re          | TS   | Pr   | Re           | TS   | Pr   |
| $O_{\beta\gamma}ATP-P_{\gamma}ATP$ | 1.70        | 1.75 | 3.54 | 1.76         | 2.57 | 3.93 |
| $O_{wat}-P_{\gamma}ATP$            | 3.13        | 2.23 | 1.61 | 5.00         | 2.32 | 1.72 |
| $O_{\gamma3}ATP-H_{Asp477}$        | 1.67        | 1.79 | 1.65 | 1.82         | 1.84 | 1.70 |
| $O_{Asp457}-H_{wat}$               |             |      |      | 1.61         | 1.44 | 1.00 |
| $H_{wat}-O_{\gamma2}ATP$           | 1.93        | 1.01 | 1.00 |              |      |      |

**Table S5. Mulliken charges of  $P_\gamma$  and  $O_{\text{wat}}$  (or  $O_{\text{Ser113}}$ ) of Re, TS and Pr for the ATPase model and the kinase model.** The ATPase model corresponds to the Model<sub>1-wat</sub> of AceK. The kinase model corresponds to the model which has the lowest energy barrier without artificial treatments.<sup>7</sup>

|    | ATPase Model |                  | Kinase Model |                     |
|----|--------------|------------------|--------------|---------------------|
|    | $P_\gamma$   | $O_{\text{wat}}$ | $P_\gamma$   | $O_{\text{Ser113}}$ |
| Re | 1.362        | -0.865           | 1.320        | -0.691              |
| TS | 1.385        | -0.818           | 1.347        | -0.709              |
| Pr | 1.255        | -0.727           | 1.338        | -0.601              |

## References

- 1 J. Akola and R. Jones, *The Journal of Physical Chemistry B*, 2006, **110**, 8121-8129.
- 2 H. Freedman, T. Laino and A. Curioni, *Journal of Chemical Theory and Computation*, 2012, **8**, 3373-3383.
- 3 M. McCullagh, M. G. Saunders and G. A. Voth, *Journal of the American Chemical Society*, 2014, **136**, 13053-13058.
- 4 M. J. McGrath, I.-F. W. Kuo, S. Hayashi and S. Takada, *J. Am. Chem. Soc.*, 2013, **135**, 8908-8919.
- 5 S. Hayashi, H. Ueno, A. R. Shaikh, M. Umemura, M. Kamiya, Y. Ito, M. Ikeguchi, Y. Komoriya, R. Iino and H. Noji, *Journal of the American Chemical Society*, 2012, **134**, 8447-8454.
- 6 B. L. Grigorenko, I. A. Kaliman and A. V. Nemukhin, *Journal of Molecular Graphics and Modelling*, 2011, **31**, 1-4.
- 7 Q. Li, J. Zheng, H. Tan, X. Li, G. Chen and Z. Jia, *PLoS One*, 2013, **8**, e72048.
- 8 S. Wang, Q. Shen, G. Chen, J. Zheng, H. Tan and Z. Jia, *Chemical Communications*, 2014, **50**, 14117-14120.



## Cartesian coordinates of reactants, transition structures and products

### 1. Model<sub>1-wat</sub> for AceK

associative Re (-4127.167015 A.U.)

|   |              |              |              |
|---|--------------|--------------|--------------|
| C | 42.519517000 | 28.444285000 | 55.153726000 |
| O | 43.415496000 | 27.749190000 | 55.634056000 |
| N | 41.396187000 | 27.892956000 | 54.598171000 |
| H | 40.687025000 | 28.485622000 | 54.158481000 |
| C | 42.363425000 | 25.930789000 | 53.342034000 |
| O | 42.601746000 | 24.728287000 | 53.263215000 |
| N | 42.947081000 | 26.858892000 | 52.525284000 |
| H | 42.637327000 | 27.829188000 | 52.531477000 |
| C | 44.678150000 | 27.553674000 | 50.814287000 |
| O | 44.733678000 | 27.700384000 | 49.592984000 |
| N | 45.454766000 | 28.279634000 | 51.672820000 |
| H | 45.127984000 | 28.307454000 | 52.632056000 |
| C | 49.409313000 | 32.463485000 | 48.492978000 |
| H | 50.029167000 | 32.312664000 | 47.597382000 |
| H | 49.600798000 | 31.598567000 | 49.143502000 |
| C | 47.929173000 | 32.472816000 | 48.085757000 |
| H | 47.314422000 | 32.613588000 | 48.986899000 |
| H | 47.732863000 | 33.350656000 | 47.452259000 |
| C | 47.487876000 | 31.208379000 | 47.329522000 |
| H | 48.091927000 | 31.112717000 | 46.415930000 |
| H | 47.695072000 | 30.312987000 | 47.932904000 |
| C | 46.003947000 | 31.218791000 | 46.929712000 |
| H | 45.786199000 | 32.152131000 | 46.393075000 |
| H | 45.791262000 | 30.399092000 | 46.236287000 |
| N | 45.056122000 | 31.107651000 | 48.062473000 |
| H | 45.493764000 | 31.439437000 | 48.922211000 |
| H | 43.846453000 | 32.167346000 | 48.080285000 |
| H | 44.799243000 | 30.136000000 | 48.251016000 |
| C | 32.408721000 | 32.004417000 | 50.575159000 |
| H | 31.655257000 | 32.803672000 | 50.649206000 |
| H | 32.150727000 | 31.266031000 | 51.341841000 |
| C | 33.766989000 | 32.639499000 | 50.966506000 |
| O | 34.402684000 | 33.245175000 | 50.057719000 |
| O | 34.105656000 | 32.526819000 | 52.182422000 |
| C | 37.238382000 | 36.643442000 | 55.419963000 |
| H | 38.159352000 | 36.622228000 | 54.821492000 |

|    |              |              |              |
|----|--------------|--------------|--------------|
| H  | 37.560798000 | 36.518638000 | 56.464039000 |
| C  | 36.368017000 | 35.429710000 | 55.032474000 |
| H  | 35.450462000 | 35.428459000 | 55.639372000 |
| H  | 36.040152000 | 35.514305000 | 53.987936000 |
| C  | 37.125383000 | 34.106056000 | 55.251368000 |
| H  | 38.043529000 | 34.094444000 | 54.648233000 |
| H  | 37.461421000 | 34.082415000 | 56.297351000 |
| C  | 36.352331000 | 32.795685000 | 55.013277000 |
| H  | 36.795034000 | 32.007509000 | 55.628895000 |
| H  | 35.300342000 | 32.888705000 | 55.300729000 |
| N  | 36.378494000 | 32.279274000 | 53.608967000 |
| H  | 36.269157000 | 31.228244000 | 53.620741000 |
| H  | 35.587803000 | 32.625921000 | 52.983903000 |
| H  | 37.306469000 | 32.415023000 | 53.162055000 |
| C  | 36.899009000 | 36.015765000 | 50.706154000 |
| H  | 35.828774000 | 35.816150000 | 50.825939000 |
| H  | 37.039799000 | 36.336638000 | 49.664392000 |
| C  | 37.674038000 | 34.723198000 | 50.893805000 |
| O  | 38.891418000 | 34.791773000 | 51.219487000 |
| N  | 37.021594000 | 33.586511000 | 50.696755000 |
| H  | 37.527319000 | 32.717834000 | 50.856164000 |
| H  | 35.993234000 | 33.528441000 | 50.460128000 |
| C  | 39.079275000 | 32.979181000 | 47.332596000 |
| H  | 38.062133000 | 32.942237000 | 46.927618000 |
| H  | 39.710859000 | 32.429279000 | 46.620735000 |
| C  | 39.090238000 | 32.194751000 | 48.633138000 |
| O  | 38.347064000 | 31.127599000 | 48.642235000 |
| O  | 39.774988000 | 32.579097000 | 49.589521000 |
| Mg | 40.258979000 | 33.307277000 | 51.494155000 |
| O  | 39.003340000 | 31.972151000 | 52.321664000 |
| P  | 39.123423000 | 30.438687000 | 52.015155000 |
| O  | 38.135828000 | 30.027239000 | 50.918319000 |
| O  | 39.177326000 | 29.572150000 | 53.263852000 |
| O  | 40.628438000 | 30.240466000 | 51.231321000 |
| P  | 42.049883000 | 30.815342000 | 51.672633000 |
| O  | 41.847236000 | 32.086371000 | 52.492889000 |
| O  | 43.013213000 | 29.756385000 | 52.087127000 |
| O  | 42.601001000 | 31.421793000 | 50.182636000 |
| P  | 42.972933000 | 32.950327000 | 49.885746000 |
| O  | 42.023338000 | 33.978850000 | 50.437038000 |
| O  | 43.205885000 | 32.962090000 | 48.335234000 |
| O  | 44.478208000 | 33.157311000 | 50.468039000 |
| O  | 36.452105000 | 29.499671000 | 53.544529000 |
| H  | 37.435963000 | 29.388232000 | 53.639378000 |

|   |              |              |              |
|---|--------------|--------------|--------------|
| H | 36.347594000 | 29.354449000 | 52.587064000 |
| C | 44.692031000 | 33.631702000 | 51.807662000 |
| H | 44.190153000 | 32.989766000 | 52.535199000 |
| H | 45.771849000 | 33.610589000 | 51.968952000 |
| H | 44.328663000 | 34.659887000 | 51.904247000 |
| C | 49.850251000 | 33.747978000 | 49.207008000 |
| H | 49.270760000 | 33.910186000 | 50.124124000 |
| H | 50.909703000 | 33.706503000 | 49.484970000 |
| H | 49.706386000 | 34.626757000 | 48.566340000 |
| C | 32.345687000 | 31.385022000 | 49.167322000 |
| H | 33.026391000 | 30.529938000 | 49.081664000 |
| H | 31.331834000 | 31.036077000 | 48.934200000 |
| H | 32.648811000 | 32.122764000 | 48.418522000 |
| C | 36.569664000 | 38.022176000 | 55.269582000 |
| H | 35.675931000 | 38.100065000 | 55.901605000 |
| H | 37.258800000 | 38.821958000 | 55.564139000 |
| H | 36.260354000 | 38.209971000 | 54.235741000 |
| C | 37.395899000 | 37.108535000 | 51.657101000 |
| H | 38.450893000 | 37.326714000 | 51.473660000 |
| H | 36.818815000 | 38.030222000 | 51.518740000 |
| H | 37.299649000 | 36.797509000 | 52.697951000 |
| C | 39.582545000 | 34.418875000 | 47.496518000 |
| H | 40.604474000 | 34.431940000 | 47.881729000 |
| H | 39.562217000 | 34.938052000 | 46.531401000 |
| H | 38.956835000 | 34.976539000 | 48.199449000 |
| C | 41.338949000 | 26.451054000 | 54.389956000 |
| H | 41.551214000 | 25.913752000 | 55.316962000 |
| H | 40.334578000 | 26.187099000 | 54.047278000 |
| C | 42.637650000 | 29.961512000 | 55.106257000 |
| H | 41.712009000 | 30.458559000 | 54.806160000 |
| H | 42.944722000 | 30.315306000 | 56.096394000 |
| H | 43.412505000 | 30.220629000 | 54.384059000 |
| C | 43.814138000 | 26.437073000 | 51.432890000 |
| H | 44.465078000 | 25.637575000 | 51.806622000 |
| H | 43.237041000 | 26.019401000 | 50.599731000 |
| C | 46.133429000 | 29.475693000 | 51.183536000 |
| H | 46.601797000 | 29.240583000 | 50.226214000 |
| H | 45.427553000 | 30.305775000 | 51.055964000 |
| H | 46.906750000 | 29.765978000 | 51.901583000 |
| O | 41.001932000 | 34.447503000 | 53.195921000 |
| H | 41.553002000 | 33.664320000 | 53.413713000 |
| H | 41.608471000 | 35.061399000 | 52.750196000 |
| H | 38.326809000 | 30.649128000 | 49.590779000 |

associative TS (-4127.125624 A.U.)

|   |              |              |              |
|---|--------------|--------------|--------------|
| C | 42.458249000 | 28.453433000 | 55.253063000 |
| O | 43.246892000 | 27.773795000 | 55.904047000 |
| N | 41.395838000 | 27.893148000 | 54.587250000 |
| H | 40.789300000 | 28.478555000 | 54.019702000 |
| C | 42.355345000 | 25.903629000 | 53.347982000 |
| O | 42.589616000 | 24.699279000 | 53.305584000 |
| N | 42.917671000 | 26.826202000 | 52.511409000 |
| H | 42.558245000 | 27.777376000 | 52.519417000 |
| C | 45.101529000 | 27.247899000 | 51.201110000 |
| O | 46.064159000 | 26.702255000 | 50.660652000 |
| N | 45.068048000 | 28.563818000 | 51.533591000 |
| H | 44.185715000 | 28.979377000 | 51.828253000 |
| C | 49.280085000 | 33.131248000 | 47.925829000 |
| H | 49.678421000 | 33.664788000 | 47.050988000 |
| H | 49.622951000 | 32.091369000 | 47.832292000 |
| C | 47.747824000 | 33.167615000 | 47.886255000 |
| H | 47.364956000 | 32.632954000 | 48.767956000 |
| H | 47.408066000 | 34.208533000 | 47.993112000 |
| C | 47.143370000 | 32.574768000 | 46.605857000 |
| H | 47.553719000 | 33.105539000 | 45.734843000 |
| H | 47.445844000 | 31.522862000 | 46.498024000 |
| C | 45.612673000 | 32.678752000 | 46.550246000 |
| H | 45.310922000 | 33.723222000 | 46.698076000 |
| H | 45.243466000 | 32.380056000 | 45.563306000 |
| N | 44.884108000 | 31.871861000 | 47.550690000 |
| H | 45.315962000 | 31.961692000 | 48.471006000 |
| H | 43.474521000 | 32.527481000 | 47.950386000 |
| H | 44.900719000 | 30.881030000 | 47.312805000 |
| C | 32.123375000 | 32.265033000 | 50.408354000 |
| H | 31.432563000 | 33.080553000 | 50.148905000 |
| H | 31.664244000 | 31.692318000 | 51.220968000 |
| C | 33.428095000 | 32.905380000 | 50.931090000 |
| O | 34.121001000 | 33.526035000 | 50.069402000 |
| O | 33.688791000 | 32.760874000 | 52.157393000 |
| C | 37.059422000 | 36.598458000 | 55.578549000 |
| H | 38.052976000 | 36.450300000 | 55.132745000 |
| H | 37.200952000 | 36.497961000 | 56.664813000 |
| C | 36.128549000 | 35.471905000 | 55.093945000 |
| H | 35.115064000 | 35.630654000 | 55.490865000 |
| H | 36.034261000 | 35.516095000 | 54.000636000 |
| C | 36.630524000 | 34.083017000 | 55.524040000 |
| H | 37.681269000 | 33.960043000 | 55.222898000 |
| H | 36.626445000 | 34.033042000 | 56.622277000 |
| C | 35.833097000 | 32.878596000 | 55.002772000 |

|    |              |              |              |
|----|--------------|--------------|--------------|
| H  | 36.137034000 | 31.983623000 | 55.556935000 |
| H  | 34.758688000 | 33.016175000 | 55.164272000 |
| N  | 36.037391000 | 32.590493000 | 53.557704000 |
| H  | 36.284917000 | 31.468827000 | 53.362027000 |
| H  | 35.204270000 | 32.837862000 | 52.960527000 |
| H  | 36.879487000 | 33.038470000 | 53.192133000 |
| C  | 36.709025000 | 36.046919000 | 50.799354000 |
| H  | 35.655648000 | 35.904062000 | 51.066195000 |
| H  | 36.712364000 | 36.348131000 | 49.742652000 |
| C  | 37.430156000 | 34.716472000 | 50.909722000 |
| O  | 38.629277000 | 34.722750000 | 51.302059000 |
| N  | 36.751086000 | 33.625079000 | 50.593430000 |
| H  | 37.212274000 | 32.726705000 | 50.706151000 |
| H  | 35.710520000 | 33.636092000 | 50.388511000 |
| C  | 39.392585000 | 32.916754000 | 47.257756000 |
| H  | 38.585366000 | 32.706425000 | 46.548638000 |
| H  | 40.309237000 | 32.486376000 | 46.831833000 |
| C  | 39.116862000 | 32.157856000 | 48.540517000 |
| O  | 38.475034000 | 31.031872000 | 48.396030000 |
| O  | 39.498720000 | 32.602886000 | 49.626965000 |
| Mg | 39.960132000 | 33.245801000 | 51.587599000 |
| O  | 38.668235000 | 31.894772000 | 52.324155000 |
| P  | 38.615366000 | 30.419442000 | 51.888404000 |
| O  | 37.820387000 | 30.015622000 | 50.658118000 |
| O  | 38.999142000 | 29.316383000 | 53.028801000 |
| O  | 40.229335000 | 30.223682000 | 51.155929000 |
| P  | 41.624620000 | 30.761939000 | 51.641923000 |
| O  | 41.465814000 | 31.998232000 | 52.518374000 |
| O  | 42.581165000 | 29.685131000 | 52.048169000 |
| O  | 42.262392000 | 31.417114000 | 50.188597000 |
| P  | 42.626370000 | 32.951652000 | 49.927319000 |
| O  | 41.742069000 | 33.959835000 | 50.607110000 |
| O  | 42.711315000 | 33.099597000 | 48.366357000 |
| O  | 44.186580000 | 33.105784000 | 50.357091000 |
| O  | 36.759926000 | 30.209436000 | 53.088314000 |
| H  | 38.130750000 | 29.271184000 | 53.511371000 |
| H  | 36.166926000 | 29.803656000 | 52.436566000 |
| C  | 44.555668000 | 33.088276000 | 51.748444000 |
| H  | 44.333154000 | 32.117630000 | 52.198775000 |
| H  | 45.630725000 | 33.276545000 | 51.779588000 |
| H  | 44.026925000 | 33.876116000 | 52.291748000 |
| C  | 49.850251000 | 33.747978000 | 49.207008000 |
| H  | 49.495954000 | 33.211905000 | 50.095842000 |
| H  | 50.945698000 | 33.715072000 | 49.214390000 |

|                                          |              |              |              |
|------------------------------------------|--------------|--------------|--------------|
| H                                        | 49.546951000 | 34.797096000 | 49.310251000 |
| C                                        | 32.345687000 | 31.385022000 | 49.167322000 |
| H                                        | 32.992582000 | 30.530709000 | 49.400545000 |
| H                                        | 31.397393000 | 30.992459000 | 48.778273000 |
| H                                        | 32.835519000 | 31.968416000 | 48.382309000 |
| C                                        | 36.569664000 | 38.022176000 | 55.269582000 |
| H                                        | 35.606598000 | 38.222621000 | 55.756338000 |
| H                                        | 37.286544000 | 38.770061000 | 55.628562000 |
| H                                        | 36.433982000 | 38.177846000 | 54.194605000 |
| C                                        | 37.395899000 | 37.108534000 | 51.657100000 |
| H                                        | 38.410019000 | 37.301095000 | 51.298044000 |
| H                                        | 36.833756000 | 38.049608000 | 51.628197000 |
| H                                        | 37.476226000 | 36.786115000 | 52.696975000 |
| C                                        | 39.582545000 | 34.418876000 | 47.496518000 |
| H                                        | 40.396662000 | 34.598464000 | 48.199920000 |
| H                                        | 39.815264000 | 34.925033000 | 46.552494000 |
| H                                        | 38.671079000 | 34.867024000 | 47.906017000 |
| C                                        | 41.338949000 | 26.451052000 | 54.389958000 |
| H                                        | 41.556147000 | 25.937691000 | 55.328110000 |
| H                                        | 40.331869000 | 26.177428000 | 54.061556000 |
| C                                        | 42.637650000 | 29.961512000 | 55.106257000 |
| H                                        | 41.731820000 | 30.482830000 | 54.789085000 |
| H                                        | 42.986585000 | 30.360642000 | 56.063233000 |
| H                                        | 43.403795000 | 30.139183000 | 54.348719000 |
| C                                        | 43.814138000 | 26.437074000 | 51.432889000 |
| H                                        | 44.116521000 | 25.406198000 | 51.621556000 |
| H                                        | 43.279107000 | 26.440959000 | 50.469556000 |
| C                                        | 46.133430000 | 29.475693000 | 51.183536000 |
| H                                        | 46.943065000 | 28.895141000 | 50.735979000 |
| H                                        | 45.786830000 | 30.229686000 | 50.460990000 |
| H                                        | 46.516912000 | 30.001457000 | 52.067840000 |
| O                                        | 40.675342000 | 34.349814000 | 53.333925000 |
| H                                        | 41.240255000 | 33.573019000 | 53.531844000 |
| H                                        | 41.269198000 | 34.987166000 | 52.904064000 |
| H                                        | 38.285804000 | 30.582041000 | 49.318877000 |
| <u>associative Pr (-4127.19190 A.U.)</u> |              |              |              |
| C                                        | 42.420653000 | 28.464133000 | 55.316830000 |
| O                                        | 43.121765000 | 27.803200000 | 56.074436000 |
| N                                        | 41.398659000 | 27.897378000 | 54.584688000 |
| H                                        | 40.950943000 | 28.478715000 | 53.885741000 |
| C                                        | 42.321705000 | 25.898827000 | 53.320528000 |
| O                                        | 42.500863000 | 24.686349000 | 53.238663000 |
| N                                        | 42.924700000 | 26.823403000 | 52.519500000 |
| H                                        | 42.611284000 | 27.791033000 | 52.544228000 |

|   |              |              |              |
|---|--------------|--------------|--------------|
| C | 45.103734000 | 27.260561000 | 51.235092000 |
| O | 46.122998000 | 26.712176000 | 50.813815000 |
| N | 45.022473000 | 28.594042000 | 51.467359000 |
| H | 44.113635000 | 29.028712000 | 51.676163000 |
| C | 48.902863000 | 32.801802000 | 48.454345000 |
| H | 49.139288000 | 32.832435000 | 47.380810000 |
| H | 49.095507000 | 31.768532000 | 48.775597000 |
| C | 47.405917000 | 33.109392000 | 48.642127000 |
| H | 47.161281000 | 33.077239000 | 49.713490000 |
| H | 47.192679000 | 34.136678000 | 48.313781000 |
| C | 46.517779000 | 32.125325000 | 47.860433000 |
| H | 46.779593000 | 32.177407000 | 46.794732000 |
| H | 46.748372000 | 31.096292000 | 48.172968000 |
| C | 45.001684000 | 32.336949000 | 47.958123000 |
| H | 44.719141000 | 33.344590000 | 47.638154000 |
| H | 44.492606000 | 31.623502000 | 47.303222000 |
| N | 44.461057000 | 32.150733000 | 49.337704000 |
| H | 45.101647000 | 31.615199000 | 49.926351000 |
| H | 44.229370000 | 33.069519000 | 49.830142000 |
| H | 43.503914000 | 31.635084000 | 49.402649000 |
| C | 31.908660000 | 32.285249000 | 50.336084000 |
| H | 31.158560000 | 33.002172000 | 49.975143000 |
| H | 31.450930000 | 31.695695000 | 51.137360000 |
| C | 33.096679000 | 33.083416000 | 50.906982000 |
| O | 33.713756000 | 33.821566000 | 50.095985000 |
| O | 33.357431000 | 32.909333000 | 52.140371000 |
| C | 36.984174000 | 36.558782000 | 55.489843000 |
| H | 37.955385000 | 36.379397000 | 55.008982000 |
| H | 37.147863000 | 36.393244000 | 56.564851000 |
| C | 35.979297000 | 35.507659000 | 54.979801000 |
| H | 34.993540000 | 35.688601000 | 55.433967000 |
| H | 35.843527000 | 35.620236000 | 53.896207000 |
| C | 36.446702000 | 34.081686000 | 55.319483000 |
| H | 37.429664000 | 33.885557000 | 54.871300000 |
| H | 36.599155000 | 34.025873000 | 56.406761000 |
| C | 35.498331000 | 32.926586000 | 54.970224000 |
| H | 35.794915000 | 32.044255000 | 55.544752000 |
| H | 34.460255000 | 33.161276000 | 55.227104000 |
| N | 35.507039000 | 32.517422000 | 53.527776000 |
| H | 35.309001000 | 31.512495000 | 53.437876000 |
| H | 34.734571000 | 32.963570000 | 52.908172000 |
| H | 36.443155000 | 32.581328000 | 53.080607000 |
| C | 36.511601000 | 36.094957000 | 50.941141000 |
| H | 35.505386000 | 36.036908000 | 51.377159000 |

|    |              |              |              |
|----|--------------|--------------|--------------|
| H  | 36.355285000 | 36.379442000 | 49.892807000 |
| C  | 37.121645000 | 34.703951000 | 50.967941000 |
| O  | 38.238733000 | 34.537973000 | 51.516748000 |
| N  | 36.420864000 | 33.732430000 | 50.389752000 |
| H  | 36.784568000 | 32.789020000 | 50.481218000 |
| H  | 35.403718000 | 33.848958000 | 50.190734000 |
| C  | 39.830987000 | 32.907374000 | 47.384202000 |
| H  | 39.469929000 | 32.498018000 | 46.436426000 |
| H  | 40.905698000 | 32.695008000 | 47.455424000 |
| C  | 39.184336000 | 32.164761000 | 48.529030000 |
| O  | 38.557205000 | 31.063091000 | 48.204677000 |
| O  | 39.240724000 | 32.613867000 | 49.674032000 |
| Mg | 39.447415000 | 32.898501000 | 51.687213000 |
| O  | 37.750831000 | 31.738367000 | 52.100192000 |
| P  | 37.534220000 | 30.277795000 | 51.669335000 |
| O  | 37.236894000 | 30.030077000 | 50.207241000 |
| O  | 38.727176000 | 29.389503000 | 52.262554000 |
| O  | 42.112280000 | 31.080650000 | 49.868439000 |
| P  | 41.987542000 | 30.919634000 | 51.383084000 |
| O  | 40.566049000 | 31.223972000 | 51.955977000 |
| O  | 42.549740000 | 29.656803000 | 52.011332000 |
| O  | 42.949772000 | 32.172341000 | 52.028712000 |
| P  | 42.689734000 | 33.769980000 | 51.788702000 |
| O  | 41.194215000 | 34.054315000 | 51.958850000 |
| O  | 43.400639000 | 34.254059000 | 50.550609000 |
| O  | 43.509324000 | 34.397235000 | 53.049133000 |
| O  | 36.226816000 | 29.761853000 | 52.534893000 |
| H  | 39.564270000 | 29.943710000 | 52.158350000 |
| H  | 35.684759000 | 29.208983000 | 51.948712000 |
| C  | 43.138851000 | 34.080988000 | 54.386315000 |
| H  | 43.071907000 | 32.997550000 | 54.535782000 |
| H  | 43.920966000 | 34.483657000 | 55.035816000 |
| H  | 42.184806000 | 34.551773000 | 54.656894000 |
| C  | 49.850251000 | 33.747978000 | 49.207008000 |
| H  | 49.671093000 | 33.712048000 | 50.288270000 |
| H  | 50.897074000 | 33.475616000 | 49.031842000 |
| H  | 49.714729000 | 34.787351000 | 48.883622000 |
| C  | 32.345687000 | 31.385022000 | 49.167322000 |
| H  | 33.076680000 | 30.636475000 | 49.496586000 |
| H  | 31.492221000 | 30.851766000 | 48.730606000 |
| H  | 32.817769000 | 31.991503000 | 48.389099000 |
| C  | 36.569664000 | 38.022176000 | 55.269582000 |
| H  | 35.629404000 | 38.249792000 | 55.787888000 |
| H  | 37.336152000 | 38.706042000 | 55.651687000 |



|   |              |              |              |
|---|--------------|--------------|--------------|
| H | 36.424498000 | 38.242845000 | 54.206973000 |
| C | 37.395899000 | 37.108534000 | 51.657100000 |
| H | 38.364800000 | 37.202373000 | 51.158591000 |
| H | 36.917741000 | 38.095268000 | 51.669686000 |
| H | 37.596293000 | 36.804287000 | 52.685757000 |
| C | 39.582545000 | 34.418876000 | 47.496518000 |
| H | 39.965635000 | 34.797863000 | 48.447055000 |
| H | 40.083905000 | 34.950989000 | 46.680436000 |
| H | 38.511877000 | 34.645419000 | 47.442749000 |
| C | 41.338949000 | 26.451054000 | 54.389958000 |
| H | 41.591101000 | 25.960402000 | 55.330745000 |
| H | 40.322564000 | 26.164159000 | 54.104262000 |
| C | 42.637650000 | 29.961511000 | 55.106257000 |
| H | 41.689513000 | 30.500444000 | 54.996981000 |
| H | 43.190367000 | 30.352856000 | 55.963061000 |
| H | 43.202034000 | 30.114831000 | 54.183436000 |
| C | 43.814138000 | 26.437072000 | 51.432889000 |
| H | 44.116631000 | 25.404156000 | 51.606336000 |
| H | 43.276202000 | 26.462086000 | 50.471670000 |
| C | 46.133430000 | 29.475694000 | 51.183536000 |
| H | 47.065981000 | 29.054225000 | 51.571411000 |
| H | 46.282110000 | 29.629046000 | 50.101212000 |
| H | 45.950209000 | 30.437773000 | 51.673942000 |
| O | 39.648940000 | 33.097853000 | 53.908721000 |
| H | 40.043798000 | 32.205819000 | 53.920714000 |
| H | 40.399118000 | 33.676475000 | 53.649618000 |
| H | 38.108570000 | 30.640156000 | 49.021732000 |

dissociative Re (-4127.153471 A.U.)

|   |              |              |              |
|---|--------------|--------------|--------------|
| C | 42.468266000 | 28.449641000 | 55.239366000 |
| O | 43.269490000 | 27.764922000 | 55.873295000 |
| N | 41.401305000 | 27.894567000 | 54.578622000 |
| H | 40.769960000 | 28.483487000 | 54.030245000 |
| C | 42.365065000 | 25.913695000 | 53.354231000 |
| O | 42.627249000 | 24.715226000 | 53.315810000 |
| N | 42.916192000 | 26.838569000 | 52.505684000 |
| H | 42.538053000 | 27.780684000 | 52.508331000 |
| C | 45.059850000 | 27.285653000 | 51.125663000 |
| O | 45.930072000 | 26.813532000 | 50.392636000 |
| N | 45.120079000 | 28.542665000 | 51.631703000 |
| H | 44.275701000 | 28.964688000 | 52.010524000 |
| C | 49.184731000 | 32.806204000 | 48.197432000 |
| H | 49.647294000 | 32.940798000 | 47.209128000 |
| H | 49.375432000 | 31.763049000 | 48.484615000 |

|   |              |              |              |
|---|--------------|--------------|--------------|
| C | 47.672540000 | 33.033831000 | 48.082632000 |
| H | 47.221940000 | 32.883825000 | 49.075229000 |
| H | 47.484198000 | 34.086399000 | 47.823264000 |
| C | 46.983148000 | 32.136304000 | 47.044143000 |
| H | 47.448701000 | 32.302354000 | 46.062367000 |
| H | 47.144495000 | 31.076878000 | 47.289386000 |
| C | 45.478538000 | 32.410911000 | 46.912617000 |
| H | 45.319467000 | 33.483353000 | 46.741943000 |
| H | 45.064466000 | 31.887653000 | 46.044790000 |
| N | 44.664528000 | 32.023286000 | 48.087075000 |
| H | 45.186475000 | 32.155827000 | 48.953821000 |
| H | 43.425966000 | 32.933919000 | 48.362052000 |
| H | 44.417733000 | 31.034393000 | 48.064859000 |
| C | 32.616087000 | 31.139552000 | 50.657790000 |
| H | 31.680582000 | 31.254956000 | 51.226004000 |
| H | 32.963390000 | 30.116523000 | 50.840203000 |
| C | 33.646437000 | 32.118423000 | 51.257884000 |
| O | 33.663087000 | 33.288506000 | 50.766209000 |
| O | 34.400201000 | 31.707438000 | 52.183785000 |
| C | 36.359176000 | 36.652315000 | 55.938347000 |
| H | 37.065619000 | 36.541424000 | 56.773598000 |
| H | 35.355683000 | 36.625413000 | 56.386895000 |
| C | 36.504042000 | 35.451528000 | 54.986506000 |
| H | 35.839279000 | 35.594246000 | 54.124113000 |
| H | 37.526182000 | 35.424646000 | 54.581982000 |
| C | 36.153793000 | 34.105117000 | 55.645819000 |
| H | 36.821065000 | 33.912170000 | 56.499878000 |
| H | 35.143520000 | 34.180973000 | 56.069778000 |
| C | 36.138644000 | 32.896443000 | 54.703549000 |
| H | 35.597465000 | 32.053509000 | 55.131008000 |
| H | 35.652473000 | 33.108585000 | 53.747547000 |
| N | 37.512461000 | 32.357130000 | 54.390671000 |
| H | 38.263976000 | 33.061057000 | 54.356319000 |
| H | 37.782521000 | 31.629598000 | 55.056030000 |
| H | 37.576252000 | 31.877957000 | 53.442173000 |
| C | 36.438378000 | 36.056182000 | 51.107604000 |
| H | 35.469075000 | 36.063548000 | 51.620706000 |
| H | 36.216665000 | 36.247918000 | 50.049441000 |
| C | 37.054502000 | 34.675932000 | 51.219902000 |
| O | 38.282715000 | 34.614330000 | 51.523406000 |
| N | 36.298638000 | 33.621841000 | 51.008912000 |
| H | 36.710697000 | 32.696121000 | 51.130807000 |
| H | 35.246835000 | 33.654928000 | 50.905297000 |
| C | 39.584665000 | 32.924340000 | 47.165981000 |

|    |              |              |              |
|----|--------------|--------------|--------------|
| H  | 38.835220000 | 32.669163000 | 46.404976000 |
| H  | 40.551535000 | 32.604149000 | 46.759923000 |
| C  | 39.307062000 | 32.091896000 | 48.399577000 |
| O  | 39.388427000 | 30.801796000 | 48.265728000 |
| O  | 39.021924000 | 32.664552000 | 49.458287000 |
| Mg | 39.513245000 | 33.077767000 | 51.377513000 |
| O  | 38.256595000 | 31.538265000 | 51.973444000 |
| P  | 39.188784000 | 30.285256000 | 51.786903000 |
| O  | 39.009307000 | 29.571375000 | 50.461442000 |
| O  | 39.438485000 | 29.521936000 | 53.055600000 |
| O  | 40.639680000 | 31.312496000 | 51.471750000 |
| P  | 42.164890000 | 31.299925000 | 51.995762000 |
| O  | 42.293826000 | 32.282608000 | 53.145063000 |
| O  | 42.753863000 | 29.932972000 | 52.020822000 |
| O  | 42.883925000 | 32.097077000 | 50.668330000 |
| P  | 42.548519000 | 33.609374000 | 50.248429000 |
| O  | 41.240340000 | 34.116165000 | 50.790055000 |
| O  | 42.682916000 | 33.609866000 | 48.687231000 |
| O  | 43.798839000 | 34.501394000 | 50.725716000 |
| O  | 35.920051000 | 30.039936000 | 53.810951000 |
| H  | 36.595023000 | 29.570777000 | 53.296826000 |
| H  | 35.324232000 | 30.450603000 | 53.141052000 |
| C  | 43.929866000 | 34.883778000 | 52.112176000 |
| H  | 43.779224000 | 34.023543000 | 52.769412000 |
| H  | 44.941544000 | 35.280208000 | 52.219468000 |
| H  | 43.201621000 | 35.666467000 | 52.346810000 |
| C  | 49.850241000 | 33.747972000 | 49.207004000 |
| H  | 49.429423000 | 33.613526000 | 50.210856000 |
| H  | 50.928990000 | 33.565843000 | 49.271945000 |
| H  | 49.704812000 | 34.798121000 | 48.924836000 |
| C  | 32.345668000 | 31.385013000 | 49.167309000 |
| H  | 33.250080000 | 31.212527000 | 48.571932000 |
| H  | 31.559822000 | 30.719620000 | 48.786247000 |
| H  | 32.042639000 | 32.423362000 | 49.009384000 |
| C  | 36.569705000 | 38.022299000 | 55.269598000 |
| H  | 35.855901000 | 38.177798000 | 54.452524000 |
| H  | 36.435085000 | 38.834921000 | 55.992920000 |
| H  | 37.578341000 | 38.112815000 | 54.849878000 |
| C  | 37.395932000 | 37.108519000 | 51.657054000 |
| H  | 38.328248000 | 37.118628000 | 51.087611000 |
| H  | 36.944874000 | 38.106898000 | 51.599045000 |
| H  | 37.649342000 | 36.912331000 | 52.700381000 |
| C  | 39.582528000 | 34.418972000 | 47.496453000 |
| H  | 40.341051000 | 34.650831000 | 48.243954000 |

|                                            |              |              |              |
|--------------------------------------------|--------------|--------------|--------------|
| H                                          | 39.791992000 | 35.006074000 | 46.593937000 |
| H                                          | 38.610605000 | 34.729079000 | 47.890007000 |
| C                                          | 41.339002000 | 26.451002000 | 54.389999000 |
| H                                          | 41.551159000 | 25.933946000 | 55.327540000 |
| H                                          | 40.334479000 | 26.181055000 | 54.051054000 |
| C                                          | 42.637669000 | 29.961499000 | 55.106185000 |
| H                                          | 41.727872000 | 30.467631000 | 54.786230000 |
| H                                          | 42.963370000 | 30.357483000 | 56.073532000 |
| H                                          | 43.417533000 | 30.163055000 | 54.373144000 |
| C                                          | 43.814001000 | 26.437003000 | 51.432999000 |
| H                                          | 44.159642000 | 25.428768000 | 51.669351000 |
| H                                          | 43.270517000 | 26.361740000 | 50.478181000 |
| C                                          | 46.133657000 | 29.475758000 | 51.183400000 |
| H                                          | 47.112382000 | 28.989363000 | 51.188443000 |
| H                                          | 45.948077000 | 29.835125000 | 50.157750000 |
| H                                          | 46.148637000 | 30.334662000 | 51.859834000 |
| O                                          | 40.059701000 | 33.577190000 | 53.429434000 |
| H                                          | 40.949416000 | 33.087653000 | 53.484211000 |
| H                                          | 40.288156000 | 34.514957000 | 53.327762000 |
| H                                          | 39.205951000 | 30.309468000 | 49.186318000 |
| <u>dissociative TS (-4127.138570 A.U.)</u> |              |              |              |
| C                                          | 42.456252000 | 28.454174000 | 55.255415000 |
| O                                          | 43.240577000 | 27.769264000 | 55.909590000 |
| N                                          | 41.398423000 | 27.894799000 | 54.579824000 |
| H                                          | 40.773347000 | 28.479573000 | 54.025961000 |
| C                                          | 42.339730000 | 25.908642000 | 53.334048000 |
| O                                          | 42.572699000 | 24.703760000 | 53.279251000 |
| N                                          | 42.900172000 | 26.832328000 | 52.496099000 |
| H                                          | 42.556807000 | 27.788456000 | 52.522310000 |
| C                                          | 45.089943000 | 27.271756000 | 51.218897000 |
| O                                          | 46.094578000 | 26.736321000 | 50.746238000 |
| N                                          | 45.023447000 | 28.597434000 | 51.486389000 |
| H                                          | 44.137817000 | 29.043460000 | 51.735064000 |
| C                                          | 49.219142000 | 32.684254000 | 48.302405000 |
| H                                          | 49.708380000 | 32.700199000 | 47.317950000 |
| H                                          | 49.405683000 | 31.685751000 | 48.720949000 |
| C                                          | 47.710409000 | 32.887109000 | 48.121702000 |
| H                                          | 47.239571000 | 32.874832000 | 49.116045000 |
| H                                          | 47.527556000 | 33.892895000 | 47.714266000 |
| C                                          | 47.042210000 | 31.850555000 | 47.206779000 |
| H                                          | 47.539382000 | 31.862834000 | 46.226311000 |
| H                                          | 47.181926000 | 30.839225000 | 47.614515000 |
| C                                          | 45.545610000 | 32.116817000 | 46.989804000 |
| H                                          | 45.411821000 | 33.143438000 | 46.624458000 |

|    |              |              |              |
|----|--------------|--------------|--------------|
| H  | 45.143761000 | 31.452290000 | 46.217989000 |
| N  | 44.699921000 | 31.957517000 | 48.191525000 |
| H  | 45.198898000 | 32.260326000 | 49.028114000 |
| H  | 43.403770000 | 32.895584000 | 48.346332000 |
| H  | 44.459773000 | 30.980913000 | 48.358396000 |
| C  | 32.791497000 | 30.904043000 | 50.553956000 |
| H  | 31.908868000 | 30.749197000 | 51.192690000 |
| H  | 33.300330000 | 29.934797000 | 50.497824000 |
| C  | 33.715142000 | 31.904155000 | 51.280877000 |
| O  | 33.524719000 | 33.131188000 | 51.044158000 |
| O  | 34.596406000 | 31.440412000 | 52.067335000 |
| C  | 36.338939000 | 36.660271000 | 55.949220000 |
| H  | 37.018636000 | 36.563101000 | 56.807971000 |
| H  | 35.321564000 | 36.636795000 | 56.365415000 |
| C  | 36.519730000 | 35.444767000 | 55.021321000 |
| H  | 35.867660000 | 35.556656000 | 54.145078000 |
| H  | 37.549644000 | 35.431022000 | 54.636682000 |
| C  | 36.186749000 | 34.106483000 | 55.706930000 |
| H  | 36.835064000 | 33.956399000 | 56.583403000 |
| H  | 35.161674000 | 34.159627000 | 56.097205000 |
| C  | 36.245006000 | 32.871345000 | 54.799642000 |
| H  | 35.763711000 | 32.014833000 | 55.277797000 |
| H  | 35.727395000 | 33.021961000 | 53.847921000 |
| N  | 37.644319000 | 32.428509000 | 54.470203000 |
| H  | 38.336004000 | 33.184744000 | 54.326544000 |
| H  | 38.033290000 | 31.801284000 | 55.177732000 |
| H  | 37.704732000 | 31.909563000 | 53.518905000 |
| C  | 36.416790000 | 36.074742000 | 51.113154000 |
| H  | 35.436826000 | 36.131490000 | 51.601898000 |
| H  | 36.232883000 | 36.245867000 | 50.043818000 |
| C  | 36.987484000 | 34.679593000 | 51.271126000 |
| O  | 38.230431000 | 34.574709000 | 51.463050000 |
| N  | 36.168813000 | 33.650200000 | 51.215732000 |
| H  | 36.549077000 | 32.710959000 | 51.333827000 |
| H  | 35.125665000 | 33.696898000 | 51.155414000 |
| C  | 39.598197000 | 32.916189000 | 47.198036000 |
| H  | 38.943208000 | 32.655655000 | 46.355575000 |
| H  | 40.603105000 | 32.579620000 | 46.918995000 |
| C  | 39.167136000 | 32.100454000 | 48.397912000 |
| O  | 39.264999000 | 30.802763000 | 48.275676000 |
| O  | 38.753797000 | 32.663547000 | 49.416332000 |
| Mg | 39.445137000 | 32.981790000 | 51.322629000 |
| O  | 38.078113000 | 31.568365000 | 52.061482000 |
| P  | 38.676184000 | 30.139264000 | 51.854473000 |

|   |              |              |              |
|---|--------------|--------------|--------------|
| O | 38.555451000 | 29.550208000 | 50.473059000 |
| O | 39.197748000 | 29.444888000 | 53.065371000 |
| O | 40.523286000 | 31.264439000 | 51.311783000 |
| P | 41.967258000 | 31.230341000 | 51.908075000 |
| O | 42.102580000 | 32.187807000 | 53.097056000 |
| O | 42.608832000 | 29.877890000 | 51.963371000 |
| O | 42.847476000 | 32.068475000 | 50.654676000 |
| P | 42.482817000 | 33.548906000 | 50.201198000 |
| O | 41.147594000 | 34.054144000 | 50.683001000 |
| O | 42.651532000 | 33.556080000 | 48.635753000 |
| O | 43.702871000 | 34.482111000 | 50.694658000 |
| O | 36.361947000 | 29.337145000 | 52.154625000 |
| H | 36.421879000 | 28.963698000 | 51.261630000 |
| H | 35.691851000 | 30.069168000 | 52.081138000 |
| C | 43.842737000 | 34.771097000 | 52.101497000 |
| H | 43.644892000 | 33.882348000 | 52.707918000 |
| H | 44.871122000 | 35.111577000 | 52.241796000 |
| H | 43.151769000 | 35.573742000 | 52.380526000 |
| C | 49.850241000 | 33.747972000 | 49.207004000 |
| H | 49.404705000 | 33.729907000 | 50.209038000 |
| H | 50.928749000 | 33.588709000 | 49.320193000 |
| H | 49.702245000 | 34.754921000 | 48.797283000 |
| C | 32.345668000 | 31.385013000 | 49.167309000 |
| H | 33.203700000 | 31.480913000 | 48.491346000 |
| H | 31.632381000 | 30.687303000 | 48.709717000 |
| H | 31.880363000 | 32.371021000 | 49.246640000 |
| C | 36.569705000 | 38.022299000 | 55.269598000 |
| H | 35.882025000 | 38.167449000 | 54.428713000 |
| H | 36.411448000 | 38.842606000 | 55.979073000 |
| H | 37.591315000 | 38.108276000 | 54.881811000 |
| C | 37.395932000 | 37.108518000 | 51.657054000 |
| H | 38.341391000 | 37.066430000 | 51.112100000 |
| H | 36.984188000 | 38.120714000 | 51.560492000 |
| H | 37.615914000 | 36.933802000 | 52.712435000 |
| C | 39.582528000 | 34.418972000 | 47.496453000 |
| H | 40.237435000 | 34.651585000 | 48.335673000 |
| H | 39.925414000 | 34.979141000 | 46.618648000 |
| H | 38.572786000 | 34.756726000 | 47.748200000 |
| C | 41.339000000 | 26.451002000 | 54.390003000 |
| H | 41.574581000 | 25.940505000 | 55.325410000 |
| H | 40.327463000 | 26.175264000 | 54.077582000 |
| C | 42.637669000 | 29.961499000 | 55.106184000 |
| H | 41.715636000 | 30.484957000 | 54.854627000 |
| H | 43.053117000 | 30.353397000 | 56.039405000 |

|                                            |              |              |              |
|--------------------------------------------|--------------|--------------|--------------|
| H                                          | 43.345469000 | 30.147897000 | 54.298242000 |
| C                                          | 43.814013000 | 26.437015000 | 51.432993000 |
| H                                          | 44.130327000 | 25.415232000 | 51.644939000 |
| H                                          | 43.290644000 | 26.416314000 | 50.463305000 |
| C                                          | 46.133648000 | 29.475746000 | 51.183403000 |
| H                                          | 47.054530000 | 29.116461000 | 51.654923000 |
| H                                          | 46.328267000 | 29.539577000 | 50.101168000 |
| H                                          | 45.897503000 | 30.472772000 | 51.565026000 |
| O                                          | 40.000401000 | 33.566986000 | 53.353586000 |
| H                                          | 40.884649000 | 33.017833000 | 53.381903000 |
| H                                          | 40.270937000 | 34.481997000 | 53.176314000 |
| H                                          | 38.995696000 | 30.338388000 | 49.153202000 |
| <u>dissociative Pr (-4127.182066 A.U.)</u> |              |              |              |
| C                                          | 42.541943000 | 28.441172000 | 55.123440000 |
| O                                          | 43.470512000 | 27.741304000 | 55.529385000 |
| N                                          | 41.402585000 | 27.893119000 | 54.596952000 |
| H                                          | 40.619792000 | 28.490904000 | 54.303054000 |
| C                                          | 42.419341000 | 25.940982000 | 53.397908000 |
| O                                          | 42.775987000 | 24.769149000 | 53.418074000 |
| N                                          | 42.919927000 | 26.860588000 | 52.503175000 |
| H                                          | 42.416006000 | 27.735085000 | 52.408162000 |
| C                                          | 44.831276000 | 27.427536000 | 50.877194000 |
| O                                          | 45.310330000 | 27.211716000 | 49.764071000 |
| N                                          | 45.181714000 | 28.480223000 | 51.651951000 |
| H                                          | 44.777380000 | 28.562262000 | 52.575846000 |
| C                                          | 48.812193000 | 32.776414000 | 48.638225000 |
| H                                          | 49.113574000 | 32.450137000 | 47.633037000 |
| H                                          | 48.776962000 | 31.870854000 | 49.258598000 |
| C                                          | 47.415040000 | 33.402463000 | 48.579640000 |
| H                                          | 47.186869000 | 33.788619000 | 49.583363000 |
| H                                          | 47.436173000 | 34.274534000 | 47.907288000 |
| C                                          | 46.310658000 | 32.433220000 | 48.135963000 |
| H                                          | 46.564296000 | 31.996890000 | 47.160935000 |
| H                                          | 46.243526000 | 31.598776000 | 48.845201000 |
| C                                          | 44.935131000 | 33.094405000 | 48.010255000 |
| H                                          | 44.930210000 | 33.857661000 | 47.224374000 |
| H                                          | 44.163046000 | 32.358066000 | 47.773095000 |
| N                                          | 44.529889000 | 33.750771000 | 49.281012000 |
| H                                          | 45.203929000 | 34.465590000 | 49.560421000 |
| H                                          | 43.596582000 | 34.278004000 | 49.243276000 |
| H                                          | 44.482547000 | 33.068985000 | 50.105552000 |
| C                                          | 33.569777000 | 30.835157000 | 49.915856000 |
| H                                          | 33.386468000 | 29.818112000 | 50.286086000 |
| H                                          | 34.436955000 | 30.757319000 | 49.244297000 |

|    |              |              |              |
|----|--------------|--------------|--------------|
| C  | 33.972672000 | 31.710810000 | 51.093770000 |
| O  | 33.497204000 | 32.814392000 | 51.290031000 |
| O  | 34.867069000 | 31.233583000 | 51.974825000 |
| C  | 37.276557000 | 37.140512000 | 56.309882000 |
| H  | 38.318292000 | 37.475780000 | 56.417135000 |
| H  | 36.808708000 | 37.289451000 | 57.294210000 |
| C  | 37.264247000 | 35.642103000 | 55.967488000 |
| H  | 36.221135000 | 35.294591000 | 55.906298000 |
| H  | 37.701045000 | 35.497502000 | 54.971771000 |
| C  | 38.030322000 | 34.783373000 | 56.985726000 |
| H  | 39.089348000 | 35.077178000 | 56.983440000 |
| H  | 37.649041000 | 34.990245000 | 57.996848000 |
| C  | 37.944124000 | 33.268501000 | 56.749677000 |
| H  | 38.518530000 | 32.758019000 | 57.531416000 |
| H  | 36.896586000 | 32.941040000 | 56.861189000 |
| N  | 38.509435000 | 32.869470000 | 55.451338000 |
| H  | 39.878686000 | 33.522665000 | 54.672142000 |
| H  | 38.675457000 | 31.862716000 | 55.398286000 |
| H  | 37.862411000 | 33.058593000 | 54.687976000 |
| C  | 36.399592000 | 36.005402000 | 52.008772000 |
| H  | 35.792922000 | 36.286351000 | 52.880698000 |
| H  | 35.690270000 | 35.831343000 | 51.189863000 |
| C  | 37.112103000 | 34.700011000 | 52.327480000 |
| O  | 38.337487000 | 34.703324000 | 52.552432000 |
| N  | 36.382503000 | 33.583305000 | 52.402611000 |
| H  | 36.900627000 | 32.704260000 | 52.484099000 |
| H  | 35.398762000 | 33.552773000 | 52.157197000 |
| C  | 39.378596000 | 32.909181000 | 47.630160000 |
| H  | 38.425755000 | 32.601926000 | 47.173799000 |
| H  | 40.151841000 | 32.353693000 | 47.084988000 |
| C  | 39.382143000 | 32.374190000 | 49.072110000 |
| O  | 39.481725000 | 31.127899000 | 49.198056000 |
| O  | 39.261223000 | 33.228905000 | 50.005600000 |
| Mg | 39.899462000 | 33.364899000 | 51.907907000 |
| O  | 38.660236000 | 31.833705000 | 52.609557000 |
| P  | 38.759116000 | 30.302707000 | 52.612109000 |
| O  | 39.624852000 | 29.782209000 | 51.393799000 |
| O  | 39.131513000 | 29.601438000 | 53.897144000 |
| O  | 41.753011000 | 32.518538000 | 51.667384000 |
| P  | 43.125496000 | 32.945223000 | 52.150447000 |
| O  | 43.203939000 | 32.926639000 | 53.756743000 |
| O  | 44.352600000 | 32.292612000 | 51.552880000 |
| O  | 43.313013000 | 34.572888000 | 51.811619000 |
| P  | 42.192834000 | 35.499829000 | 51.027290000 |



|   |              |              |              |
|---|--------------|--------------|--------------|
| O | 40.844963000 | 35.275787000 | 51.681458000 |
| O | 42.405379000 | 35.335203000 | 49.540398000 |
| O | 42.749214000 | 36.983530000 | 51.411897000 |
| O | 37.178323000 | 29.796904000 | 52.262493000 |
| H | 37.055037000 | 28.989086000 | 52.786383000 |
| H | 35.500320000 | 30.533310000 | 51.690755000 |
| C | 42.627716000 | 37.432382000 | 52.759572000 |
| H | 43.199423000 | 36.790185000 | 53.440845000 |
| H | 43.036589000 | 38.446456000 | 52.793297000 |
| H | 41.577580000 | 37.452653000 | 53.071456000 |
| C | 49.850241000 | 33.747972000 | 49.207004000 |
| H | 49.587533000 | 34.050621000 | 50.227753000 |
| H | 50.847766000 | 33.294948000 | 49.240761000 |
| H | 49.918553000 | 34.658326000 | 48.598062000 |
| C | 32.345668000 | 31.385013000 | 49.167309000 |
| H | 32.541882000 | 32.394573000 | 48.797299000 |
| H | 32.098235000 | 30.740144000 | 48.317573000 |
| H | 31.476389000 | 31.438330000 | 49.829624000 |
| C | 36.569705000 | 38.022299000 | 55.269598000 |
| H | 35.524832000 | 37.715034000 | 55.134025000 |
| H | 36.567231000 | 39.074534000 | 55.578967000 |
| H | 37.065828000 | 37.963172000 | 54.296669000 |
| C | 37.395932000 | 37.108519000 | 51.657054000 |
| H | 37.973030000 | 36.841973000 | 50.767272000 |
| H | 36.873189000 | 38.053627000 | 51.468799000 |
| H | 38.118245000 | 37.256187000 | 52.462489000 |
| C | 39.582528000 | 34.418972000 | 47.496453000 |
| H | 40.513502000 | 34.738241000 | 47.973865000 |
| H | 39.606176000 | 34.715390000 | 46.438608000 |
| H | 38.769639000 | 34.965007000 | 47.985725000 |
| C | 41.339001000 | 26.450997000 | 54.389998000 |
| H | 41.500645000 | 25.896792000 | 55.318442000 |
| H | 40.349907000 | 26.202757000 | 53.993120000 |
| C | 42.637670000 | 29.961503000 | 55.106185000 |
| H | 41.672389000 | 30.443330000 | 54.927630000 |
| H | 43.063234000 | 30.304102000 | 56.053402000 |
| H | 43.320950000 | 30.276106000 | 54.311333000 |
| C | 43.814002000 | 26.437005000 | 51.433000000 |
| H | 44.356463000 | 25.565164000 | 51.813592000 |
| H | 43.252669000 | 26.085604000 | 50.557291000 |
| C | 46.133657000 | 29.475757000 | 51.183400000 |
| H | 47.117751000 | 29.341342000 | 51.653936000 |
| H | 46.243061000 | 29.332401000 | 50.106846000 |
| H | 45.753035000 | 30.478159000 | 51.399417000 |

|   |              |              |              |
|---|--------------|--------------|--------------|
| O | 40.615654000 | 33.789845000 | 54.027797000 |
| H | 42.305473000 | 33.181543000 | 54.089900000 |
| H | 40.544597000 | 34.745726000 | 53.861413000 |
| H | 39.576010000 | 30.382424000 | 50.554718000 |

## 2. Model<sub>2-wat</sub> for AceK

associative Re (-4203.618278 A.U.)

|   |              |              |              |
|---|--------------|--------------|--------------|
| C | 42.499700000 | 28.445187000 | 55.208108000 |
| O | 43.339057000 | 27.754615000 | 55.783898000 |
| N | 41.408493000 | 27.891768000 | 54.588029000 |
| H | 40.746723000 | 28.502447000 | 54.106048000 |
| C | 42.356796000 | 25.904462000 | 53.347653000 |
| O | 42.603193000 | 24.701614000 | 53.305868000 |
| N | 42.908527000 | 26.826026000 | 52.502182000 |
| H | 42.548700000 | 27.776013000 | 52.519380000 |
| C | 45.051698000 | 27.297857000 | 51.128712000 |
| O | 45.939023000 | 26.828538000 | 50.412650000 |
| N | 45.091679000 | 28.564359000 | 51.608613000 |
| H | 44.239317000 | 28.983603000 | 51.980309000 |
| C | 49.355826000 | 32.802060000 | 48.107124000 |
| H | 49.806055000 | 33.089086000 | 47.145992000 |
| H | 49.704634000 | 31.781125000 | 48.315269000 |
| C | 47.828298000 | 32.798463000 | 47.966397000 |
| H | 47.389639000 | 32.498937000 | 48.929370000 |
| H | 47.479964000 | 33.825521000 | 47.780645000 |
| C | 47.313013000 | 31.887304000 | 46.842735000 |
| H | 47.795029000 | 32.177343000 | 45.898010000 |
| H | 47.609983000 | 30.846083000 | 47.034348000 |
| C | 45.792892000 | 31.960622000 | 46.639802000 |
| H | 45.492632000 | 33.006416000 | 46.498612000 |
| H | 45.502063000 | 31.422782000 | 45.731144000 |
| N | 44.973880000 | 31.419239000 | 47.744935000 |
| H | 45.337824000 | 31.728892000 | 48.646824000 |
| H | 43.509891000 | 32.063028000 | 47.836905000 |
| H | 45.002768000 | 30.400021000 | 47.765207000 |
| C | 32.034842000 | 32.267241000 | 50.385725000 |
| H | 31.622605000 | 33.230640000 | 50.067321000 |
| H | 31.295551000 | 31.762406000 | 51.019719000 |
| C | 33.309879000 | 32.509920000 | 51.210232000 |
| O | 33.855036000 | 33.651757000 | 51.111851000 |
| O | 33.722474000 | 31.525083000 | 51.887031000 |
| C | 37.032857000 | 36.564577000 | 55.389591000 |
| H | 37.960762000 | 36.430126000 | 54.817752000 |

|    |              |              |              |
|----|--------------|--------------|--------------|
| H  | 37.289539000 | 36.337449000 | 56.433474000 |
| C  | 35.976148000 | 35.571908000 | 54.885506000 |
| H  | 35.132515000 | 35.548215000 | 55.591661000 |
| H  | 35.560152000 | 35.950136000 | 53.940635000 |
| C  | 36.497080000 | 34.146813000 | 54.641739000 |
| H  | 37.342992000 | 34.180340000 | 53.942982000 |
| H  | 36.885159000 | 33.708030000 | 55.570639000 |
| C  | 35.388769000 | 33.273823000 | 54.052071000 |
| H  | 34.636828000 | 33.019562000 | 54.806708000 |
| H  | 34.873468000 | 33.794338000 | 53.238199000 |
| N  | 35.869186000 | 31.996413000 | 53.451329000 |
| H  | 36.127387000 | 31.261103000 | 54.143748000 |
| H  | 35.089484000 | 31.671535000 | 52.793618000 |
| H  | 36.748381000 | 32.122960000 | 52.900164000 |
| C  | 36.523942000 | 36.119445000 | 50.883847000 |
| H  | 35.580881000 | 35.905565000 | 51.400505000 |
| H  | 36.237063000 | 36.546370000 | 49.912456000 |
| C  | 37.229125000 | 34.803505000 | 50.601378000 |
| O  | 38.489872000 | 34.748888000 | 50.650174000 |
| N  | 36.470507000 | 33.766481000 | 50.272378000 |
| H  | 36.954372000 | 32.904794000 | 50.013686000 |
| H  | 35.451781000 | 33.746208000 | 50.481117000 |
| C  | 40.205824000 | 33.843669000 | 46.224087000 |
| H  | 39.653059000 | 34.155403000 | 45.325842000 |
| H  | 41.233279000 | 34.196776000 | 46.084903000 |
| C  | 40.243982000 | 32.335343000 | 46.197458000 |
| O  | 40.984179000 | 31.857860000 | 45.170940000 |
| O  | 39.664880000 | 31.576329000 | 46.952684000 |
| Mg | 39.580006000 | 33.086004000 | 51.080700000 |
| O  | 38.425719000 | 31.973826000 | 52.345383000 |
| P  | 39.069512000 | 30.552015000 | 52.211824000 |
| O  | 38.503414000 | 29.753669000 | 51.059849000 |
| O  | 39.423975000 | 29.878955000 | 53.521871000 |
| O  | 40.584922000 | 31.212799000 | 51.507360000 |
| P  | 42.144321000 | 31.101676000 | 51.872316000 |
| O  | 42.537576000 | 32.252324000 | 52.771970000 |
| O  | 42.593820000 | 29.697492000 | 52.092343000 |
| O  | 42.784438000 | 31.509698000 | 50.323872000 |
| P  | 42.581636000 | 32.915906000 | 49.611712000 |
| O  | 41.342367000 | 33.649258000 | 50.045540000 |
| O  | 42.658172000 | 32.623152000 | 48.067868000 |
| O  | 43.931595000 | 33.765951000 | 49.852821000 |
| O  | 37.082336000 | 29.935989000 | 54.990498000 |
| H  | 37.994322000 | 29.988889000 | 54.599823000 |

|   |              |              |              |
|---|--------------|--------------|--------------|
| H | 36.773099000 | 29.071643000 | 54.678622000 |
| C | 44.199706000 | 34.392995000 | 51.126824000 |
| H | 44.022747000 | 33.695147000 | 51.949095000 |
| H | 45.246615000 | 34.701658000 | 51.094485000 |
| H | 43.564023000 | 35.277594000 | 51.239193000 |
| C | 49.850241000 | 33.747972000 | 49.207004000 |
| H | 49.444585000 | 33.463997000 | 50.185546000 |
| H | 50.943388000 | 33.734048000 | 49.284091000 |
| H | 49.542424000 | 34.782021000 | 49.008066000 |
| C | 32.345668000 | 31.385013000 | 49.167309000 |
| H | 32.772327000 | 30.430803000 | 49.492535000 |
| H | 31.443758000 | 31.179094000 | 48.577137000 |
| H | 33.073727000 | 31.873656000 | 48.508415000 |
| C | 36.569702000 | 38.022293000 | 55.269587000 |
| H | 35.648732000 | 38.194299000 | 55.841573000 |
| H | 37.328957000 | 38.717668000 | 55.647309000 |
| H | 36.363949000 | 38.285271000 | 54.226333000 |
| C | 37.395937000 | 37.108521000 | 51.657061000 |
| H | 38.296517000 | 37.357489000 | 51.088689000 |
| H | 36.842973000 | 38.034225000 | 51.850710000 |
| H | 37.718205000 | 36.691237000 | 52.613663000 |
| C | 39.582526000 | 34.418974000 | 47.496455000 |
| H | 40.198789000 | 34.207565000 | 48.365157000 |
| H | 39.491805000 | 35.506908000 | 47.402282000 |
| H | 38.581232000 | 34.014377000 | 47.667243000 |
| C | 41.338994000 | 26.450996000 | 54.389999000 |
| H | 41.551241000 | 25.924459000 | 55.323027000 |
| H | 40.331116000 | 26.186692000 | 54.055672000 |
| C | 42.637680000 | 29.961507000 | 55.106182000 |
| H | 41.714797000 | 30.456245000 | 54.801527000 |
| H | 42.955395000 | 30.341359000 | 56.083165000 |
| H | 43.416899000 | 30.196109000 | 54.381860000 |
| C | 43.813997000 | 26.436998000 | 51.433002000 |
| H | 44.172077000 | 25.431980000 | 51.665682000 |
| H | 43.274608000 | 26.356670000 | 50.475527000 |
| C | 46.133658000 | 29.475764000 | 51.183401000 |
| H | 46.084360000 | 29.691979000 | 50.104048000 |
| H | 46.029220000 | 30.410663000 | 51.740286000 |
| H | 47.120526000 | 29.046130000 | 51.380781000 |
| O | 40.556411000 | 34.062141000 | 52.704000000 |
| H | 41.285722000 | 33.410607000 | 52.923825000 |
| H | 41.022457000 | 34.803867000 | 52.287687000 |
| H | 40.932515000 | 30.885436000 | 45.240093000 |
| O | 38.605278000 | 31.940025000 | 49.530612000 |

|                                           |              |              |              |
|-------------------------------------------|--------------|--------------|--------------|
| H                                         | 38.499742000 | 31.014601000 | 49.922261000 |
| H                                         | 38.976914000 | 31.838589000 | 48.629865000 |
| <u>associative TS (-4203.562989 A.U.)</u> |              |              |              |
| C                                         | 42.489242000 | 28.449945000 | 55.236600000 |
| O                                         | 43.300166000 | 27.761950000 | 55.851305000 |
| N                                         | 41.406707000 | 27.890775000 | 54.598710000 |
| H                                         | 40.808026000 | 28.504398000 | 54.056326000 |
| C                                         | 42.346044000 | 25.898152000 | 53.340411000 |
| O                                         | 42.572861000 | 24.691775000 | 53.291925000 |
| N                                         | 42.908335000 | 26.819261000 | 52.504985000 |
| H                                         | 42.555867000 | 27.772288000 | 52.524407000 |
| C                                         | 45.063436000 | 27.292595000 | 51.169650000 |
| O                                         | 46.018294000 | 26.792175000 | 50.571733000 |
| N                                         | 45.037555000 | 28.596084000 | 51.539049000 |
| H                                         | 44.165416000 | 29.015948000 | 51.865001000 |
| C                                         | 49.399346000 | 32.865839000 | 48.037150000 |
| H                                         | 49.821799000 | 33.256587000 | 47.100203000 |
| H                                         | 49.811557000 | 31.854509000 | 48.159135000 |
| C                                         | 47.873165000 | 32.778775000 | 47.902202000 |
| H                                         | 47.459841000 | 32.367262000 | 48.834543000 |
| H                                         | 47.459673000 | 33.794130000 | 47.808606000 |
| C                                         | 47.409649000 | 31.940497000 | 46.701425000 |
| H                                         | 47.868875000 | 32.343575000 | 45.787134000 |
| H                                         | 47.774789000 | 30.907696000 | 46.799869000 |
| C                                         | 45.886880000 | 31.929718000 | 46.499994000 |
| H                                         | 45.514879000 | 32.961052000 | 46.462574000 |
| H                                         | 45.634786000 | 31.467464000 | 45.539335000 |
| N                                         | 45.105715000 | 31.226794000 | 47.538417000 |
| H                                         | 45.420167000 | 31.504570000 | 48.468749000 |
| H                                         | 43.583475000 | 31.783855000 | 47.665290000 |
| H                                         | 45.233272000 | 30.217050000 | 47.477778000 |
| C                                         | 32.203042000 | 32.691405000 | 49.968964000 |
| H                                         | 31.761189000 | 33.473355000 | 49.341687000 |
| H                                         | 31.540393000 | 32.516606000 | 50.825911000 |
| C                                         | 33.567095000 | 33.182120000 | 50.496091000 |
| O                                         | 34.105415000 | 34.144551000 | 49.873348000 |
| O                                         | 34.039577000 | 32.547886000 | 51.482773000 |
| C                                         | 37.300509000 | 36.824356000 | 55.913688000 |
| H                                         | 38.359981000 | 37.090643000 | 56.024688000 |
| H                                         | 36.921187000 | 36.675699000 | 56.935347000 |
| C                                         | 37.216033000 | 35.481419000 | 55.148367000 |
| H                                         | 37.425461000 | 35.664285000 | 54.089524000 |
| H                                         | 38.033290000 | 34.834899000 | 55.486948000 |
| C                                         | 35.873899000 | 34.721141000 | 55.311504000 |

|    |              |              |              |
|----|--------------|--------------|--------------|
| H  | 35.995052000 | 33.910277000 | 56.040819000 |
| H  | 35.120077000 | 35.397950000 | 55.738930000 |
| C  | 35.233280000 | 34.158143000 | 54.036638000 |
| H  | 34.261743000 | 33.714815000 | 54.274599000 |
| H  | 35.040908000 | 34.963665000 | 53.318455000 |
| N  | 35.990312000 | 33.109113000 | 53.302743000 |
| H  | 36.275751000 | 32.199002000 | 53.822141000 |
| H  | 35.385970000 | 32.841813000 | 52.471300000 |
| H  | 36.910388000 | 33.402970000 | 52.944418000 |
| C  | 36.992876000 | 36.434352000 | 50.344441000 |
| H  | 35.905401000 | 36.372754000 | 50.236243000 |
| H  | 37.380783000 | 37.009890000 | 49.493311000 |
| C  | 37.601389000 | 35.051250000 | 50.256751000 |
| O  | 38.843811000 | 34.933812000 | 50.475620000 |
| N  | 36.805536000 | 34.044044000 | 49.949898000 |
| H  | 37.242107000 | 33.126019000 | 49.848830000 |
| H  | 35.754577000 | 34.130391000 | 49.914542000 |
| C  | 40.123408000 | 33.823038000 | 46.195179000 |
| H  | 39.528395000 | 34.136677000 | 45.325394000 |
| H  | 41.147072000 | 34.159960000 | 45.993990000 |
| C  | 40.143833000 | 32.313536000 | 46.174761000 |
| O  | 40.760929000 | 31.826405000 | 45.074340000 |
| O  | 39.651308000 | 31.560458000 | 46.994969000 |
| Mg | 39.879242000 | 33.302396000 | 51.043915000 |
| O  | 38.605725000 | 32.598505000 | 52.462727000 |
| P  | 38.897478000 | 31.086919000 | 52.525381000 |
| O  | 38.289131000 | 30.162417000 | 51.509987000 |
| O  | 39.495217000 | 30.488666000 | 53.880106000 |
| O  | 40.562127000 | 31.382275000 | 51.701857000 |
| P  | 42.111135000 | 31.053426000 | 51.860780000 |
| O  | 42.791436000 | 32.180394000 | 52.613320000 |
| O  | 42.421070000 | 29.614321000 | 52.118012000 |
| O  | 42.616190000 | 31.257275000 | 50.212971000 |
| P  | 42.690982000 | 32.646890000 | 49.458346000 |
| O  | 41.601532000 | 33.605732000 | 49.858012000 |
| O  | 42.720580000 | 32.303829000 | 47.921308000 |
| O  | 44.173302000 | 33.258983000 | 49.668869000 |
| O  | 37.150317000 | 30.885044000 | 54.090031000 |
| H  | 38.561998000 | 30.488010000 | 54.378412000 |
| H  | 36.676768000 | 30.112408000 | 53.743178000 |
| C  | 44.533516000 | 34.030407000 | 50.835056000 |
| H  | 44.320782000 | 33.466628000 | 51.745725000 |
| H  | 45.602258000 | 34.233184000 | 50.738155000 |
| H  | 43.985156000 | 34.978501000 | 50.832322000 |

|                                           |              |              |              |
|-------------------------------------------|--------------|--------------|--------------|
| C                                         | 49.850241000 | 33.747972000 | 49.207004000 |
| H                                         | 49.470281000 | 33.364787000 | 50.161837000 |
| H                                         | 50.943130000 | 33.789583000 | 49.277172000 |
| H                                         | 49.483505000 | 34.775579000 | 49.092584000 |
| C                                         | 32.345668000 | 31.385013000 | 49.167309000 |
| H                                         | 32.800607000 | 30.608013000 | 49.790416000 |
| H                                         | 31.372079000 | 31.022129000 | 48.814486000 |
| H                                         | 32.988448000 | 31.535401000 | 48.291710000 |
| C                                         | 36.569702000 | 38.022293000 | 55.269587000 |
| H                                         | 35.505005000 | 37.810982000 | 55.107108000 |
| H                                         | 36.636061000 | 38.907445000 | 55.913123000 |
| H                                         | 37.009191000 | 38.277348000 | 54.299799000 |
| C                                         | 37.395937000 | 37.108520000 | 51.657060000 |
| H                                         | 38.475995000 | 37.045869000 | 51.809534000 |
| H                                         | 37.100176000 | 38.164437000 | 51.661034000 |
| H                                         | 36.898123000 | 36.627192000 | 52.500049000 |
| C                                         | 39.582526000 | 34.418974000 | 47.496457000 |
| H                                         | 40.246266000 | 34.200109000 | 48.326751000 |
| H                                         | 39.512714000 | 35.507964000 | 47.399362000 |
| H                                         | 38.584354000 | 34.037504000 | 47.721606000 |
| C                                         | 41.338992000 | 26.450997000 | 54.390000000 |
| H                                         | 41.560532000 | 25.930666000 | 55.323716000 |
| H                                         | 40.327566000 | 26.181879000 | 54.070387000 |
| C                                         | 42.637680000 | 29.961507000 | 55.106182000 |
| H                                         | 41.714663000 | 30.463676000 | 54.816523000 |
| H                                         | 42.984407000 | 30.350530000 | 56.069379000 |
| H                                         | 43.402771000 | 30.177402000 | 54.360330000 |
| C                                         | 43.813998000 | 26.436998000 | 51.433001000 |
| H                                         | 44.160207000 | 25.424297000 | 51.646326000 |
| H                                         | 43.277193000 | 26.387607000 | 50.471459000 |
| C                                         | 46.133658000 | 29.475764000 | 51.183401000 |
| H                                         | 46.212314000 | 29.619342000 | 50.094190000 |
| H                                         | 45.972706000 | 30.445210000 | 51.662196000 |
| H                                         | 47.085508000 | 29.056099000 | 51.523223000 |
| O                                         | 41.090039000 | 34.275634000 | 52.511340000 |
| H                                         | 41.725241000 | 33.537550000 | 52.748059000 |
| H                                         | 41.634174000 | 34.893678000 | 51.999069000 |
| H                                         | 40.718368000 | 30.854726000 | 45.157253000 |
| O                                         | 38.805295000 | 32.040193000 | 49.616676000 |
| H                                         | 38.596376000 | 31.185468000 | 50.087265000 |
| H                                         | 39.119220000 | 31.836763000 | 48.710661000 |
| <u>associative Pr (-4203.634028 A.U.)</u> |              |              |              |
| C                                         | 42.363088000 | 28.477921000 | 55.366369000 |
| O                                         | 42.971462000 | 27.836963000 | 56.218335000 |

|   |              |              |              |
|---|--------------|--------------|--------------|
| N | 41.395572000 | 27.901416000 | 54.566121000 |
| H | 41.095184000 | 28.467559000 | 53.777638000 |
| C | 42.349914000 | 25.892717000 | 53.347652000 |
| O | 42.587249000 | 24.688254000 | 53.307177000 |
| N | 42.915133000 | 26.815666000 | 52.512314000 |
| H | 42.530014000 | 27.757847000 | 52.486539000 |
| C | 45.071344000 | 27.296057000 | 51.240557000 |
| O | 46.127195000 | 26.775022000 | 50.880316000 |
| N | 44.958859000 | 28.643056000 | 51.399526000 |
| H | 44.061411000 | 29.072327000 | 51.630109000 |
| C | 49.282327000 | 32.605999000 | 48.357964000 |
| H | 49.774494000 | 32.597452000 | 47.375108000 |
| H | 49.522425000 | 31.642641000 | 48.828345000 |
| C | 47.765155000 | 32.712562000 | 48.163886000 |
| H | 47.290861000 | 32.734948000 | 49.155908000 |
| H | 47.528505000 | 33.678296000 | 47.692230000 |
| C | 47.161824000 | 31.581251000 | 47.320385000 |
| H | 47.667957000 | 31.548146000 | 46.344816000 |
| H | 47.353141000 | 30.611297000 | 47.801545000 |
| C | 45.654539000 | 31.742671000 | 47.071345000 |
| H | 45.465395000 | 32.712244000 | 46.593251000 |
| H | 45.299928000 | 30.974911000 | 46.375471000 |
| N | 44.799667000 | 31.671373000 | 48.270695000 |
| H | 45.173316000 | 32.255391000 | 49.019333000 |
| H | 43.300479000 | 32.336189000 | 48.233270000 |
| H | 44.756169000 | 30.723658000 | 48.645092000 |
| C | 32.260420000 | 32.802876000 | 49.737292000 |
| H | 32.493453000 | 33.553406000 | 48.974426000 |
| H | 31.230282000 | 33.007487000 | 50.066114000 |
| C | 33.170644000 | 33.068742000 | 50.945118000 |
| O | 33.713012000 | 34.196561000 | 51.042084000 |
| O | 33.289943000 | 32.126952000 | 51.808811000 |
| C | 37.256424000 | 36.655473000 | 55.450175000 |
| H | 38.307873000 | 36.754116000 | 55.152616000 |
| H | 37.272407000 | 36.386756000 | 56.516147000 |
| C | 36.620263000 | 35.506110000 | 54.636895000 |
| H | 36.310366000 | 35.902329000 | 53.665637000 |
| H | 37.381582000 | 34.744963000 | 54.425055000 |
| C | 35.393315000 | 34.849612000 | 55.288704000 |
| H | 35.702476000 | 34.167082000 | 56.093040000 |
| H | 34.770268000 | 35.619099000 | 55.766507000 |
| C | 34.476975000 | 34.127567000 | 54.297257000 |
| H | 33.570812000 | 33.773361000 | 54.800098000 |
| H | 34.160603000 | 34.792670000 | 53.489007000 |



|    |              |              |              |
|----|--------------|--------------|--------------|
| N  | 35.047181000 | 32.934502000 | 53.607935000 |
| H  | 35.218750000 | 32.141061000 | 54.229649000 |
| H  | 34.316539000 | 32.598841000 | 52.859714000 |
| H  | 35.931302000 | 33.051511000 | 53.072510000 |
| C  | 36.390385000 | 36.244857000 | 50.904229000 |
| H  | 35.531490000 | 35.966779000 | 51.528683000 |
| H  | 35.962013000 | 36.791307000 | 50.054894000 |
| C  | 37.000986000 | 34.949870000 | 50.391955000 |
| O  | 38.171197000 | 34.642859000 | 50.699703000 |
| N  | 36.222113000 | 34.204093000 | 49.595658000 |
| H  | 36.598657000 | 33.291182000 | 49.340200000 |
| H  | 35.213051000 | 34.293156000 | 49.724916000 |
| C  | 40.402904000 | 33.856255000 | 46.336068000 |
| H  | 39.994774000 | 34.170756000 | 45.363808000 |
| H  | 41.436329000 | 34.213969000 | 46.366328000 |
| C  | 40.454065000 | 32.348680000 | 46.308372000 |
| O  | 41.386526000 | 31.880107000 | 45.443943000 |
| O  | 39.741844000 | 31.578706000 | 46.926385000 |
| Mg | 38.944200000 | 32.700326000 | 51.078545000 |
| O  | 37.172274000 | 32.052311000 | 51.926159000 |
| P  | 36.644779000 | 30.632999000 | 51.573601000 |
| O  | 36.347014000 | 30.431494000 | 50.100841000 |
| O  | 37.659587000 | 29.557895000 | 52.205780000 |
| O  | 39.933402000 | 30.905859000 | 51.399146000 |
| P  | 41.405342000 | 30.862151000 | 51.883433000 |
| O  | 41.688340000 | 31.934528000 | 52.936494000 |
| O  | 42.006800000 | 29.486802000 | 52.063466000 |
| O  | 42.308471000 | 31.433214000 | 50.487893000 |
| P  | 42.137851000 | 32.917476000 | 49.973816000 |
| O  | 40.820785000 | 33.551457000 | 50.321711000 |
| O  | 42.433045000 | 32.861262000 | 48.420058000 |
| O  | 43.412598000 | 33.768465000 | 50.496625000 |
| O  | 35.320870000 | 30.329026000 | 52.467885000 |
| H  | 38.583855000 | 29.864447000 | 52.006948000 |
| H  | 34.528179000 | 30.666284000 | 51.991594000 |
| C  | 43.466197000 | 34.259391000 | 51.853115000 |
| H  | 43.202571000 | 33.469360000 | 52.560867000 |
| H  | 44.491791000 | 34.603041000 | 52.008441000 |
| H  | 42.780088000 | 35.106035000 | 51.963776000 |
| C  | 49.850241000 | 33.747972000 | 49.207004000 |
| H  | 49.402565000 | 33.756994000 | 50.208073000 |
| H  | 50.935390000 | 33.654776000 | 49.329359000 |
| H  | 49.648817000 | 34.722747000 | 48.745980000 |
| C  | 32.345668000 | 31.385013000 | 49.167309000 |

|   |              |              |              |
|---|--------------|--------------|--------------|
| H | 32.041844000 | 30.650828000 | 49.919312000 |
| H | 31.695868000 | 31.273869000 | 48.290833000 |
| H | 33.371242000 | 31.137770000 | 48.870739000 |
| C | 36.569702000 | 38.022292000 | 55.269587000 |
| H | 35.506669000 | 37.981527000 | 55.540171000 |
| H | 37.039839000 | 38.784509000 | 55.902083000 |
| H | 36.634557000 | 38.360810000 | 54.231253000 |
| C | 37.395937000 | 37.108521000 | 51.657062000 |
| H | 38.173576000 | 37.474536000 | 50.977387000 |
| H | 36.900830000 | 37.979751000 | 52.098549000 |
| H | 37.901088000 | 36.547628000 | 52.443360000 |
| C | 39.582526000 | 34.418974000 | 47.496454000 |
| H | 39.998527000 | 34.138437000 | 48.460038000 |
| H | 39.571582000 | 35.513649000 | 47.436148000 |
| H | 38.546281000 | 34.072959000 | 47.454960000 |
| C | 41.338990000 | 26.451002000 | 54.390006000 |
| H | 41.572562000 | 25.975688000 | 55.343002000 |
| H | 40.330144000 | 26.154546000 | 54.084902000 |
| C | 42.637679000 | 29.961503000 | 55.106182000 |
| H | 41.754265000 | 30.528776000 | 54.817422000 |
| H | 43.084589000 | 30.384787000 | 56.009596000 |
| H | 43.347830000 | 30.049564000 | 54.280434000 |
| C | 43.814001000 | 26.436995000 | 51.432995000 |
| H | 44.149850000 | 25.417372000 | 51.623458000 |
| H | 43.278341000 | 26.430739000 | 50.469386000 |
| C | 46.133660000 | 29.475765000 | 51.183402000 |
| H | 46.479880000 | 29.421831000 | 50.142100000 |
| H | 45.879024000 | 30.509661000 | 51.431354000 |
| H | 46.963081000 | 29.145657000 | 51.817591000 |
| O | 39.631311000 | 33.572909000 | 52.905879000 |
| H | 40.423935000 | 32.966694000 | 53.076299000 |
| H | 40.023462000 | 34.383960000 | 52.545101000 |
| H | 41.326065000 | 30.907439000 | 45.500327000 |
| O | 38.163328000 | 32.069529000 | 49.206435000 |
| H | 37.525279000 | 31.305553000 | 49.369296000 |
| H | 38.737385000 | 31.856251000 | 48.442603000 |

dissociative Re (-4203.608513 A.U.)

|   |              |              |              |
|---|--------------|--------------|--------------|
| C | 42.579779000 | 28.439867000 | 55.101771000 |
| O | 43.527169000 | 27.750816000 | 55.487994000 |
| N | 41.424512000 | 27.884679000 | 54.624251000 |
| H | 40.713004000 | 28.510317000 | 54.238139000 |
| C | 42.362907000 | 25.920134000 | 53.343306000 |
| O | 42.629329000 | 24.720929000 | 53.293084000 |

|   |              |              |              |
|---|--------------|--------------|--------------|
| N | 42.905916000 | 26.840638000 | 52.495315000 |
| H | 42.580454000 | 27.806857000 | 52.499289000 |
| C | 44.667297000 | 27.565023000 | 50.823916000 |
| O | 44.761903000 | 27.693226000 | 49.600031000 |
| N | 45.399911000 | 28.321476000 | 51.688492000 |
| H | 45.060104000 | 28.363220000 | 52.643316000 |
| C | 49.420575000 | 32.424895000 | 48.554233000 |
| H | 50.034031000 | 32.248797000 | 47.658709000 |
| H | 49.638955000 | 31.592891000 | 49.238226000 |
| C | 47.935714000 | 32.375518000 | 48.157931000 |
| H | 47.319735000 | 32.509322000 | 49.059418000 |
| H | 47.705808000 | 33.232481000 | 47.507288000 |
| C | 47.541055000 | 31.078786000 | 47.427484000 |
| H | 48.174183000 | 30.974662000 | 46.534455000 |
| H | 47.756546000 | 30.206549000 | 48.060891000 |
| C | 46.070147000 | 31.027744000 | 46.975324000 |
| H | 45.830239000 | 31.951231000 | 46.431762000 |
| H | 45.922720000 | 30.200663000 | 46.273259000 |
| N | 45.072511000 | 30.867542000 | 48.055348000 |
| H | 45.379767000 | 31.369497000 | 48.888580000 |
| H | 43.676677000 | 31.640484000 | 47.883564000 |
| H | 44.972866000 | 29.890044000 | 48.347208000 |
| C | 32.355826000 | 32.709192000 | 49.944598000 |
| H | 31.762938000 | 33.468166000 | 49.423471000 |
| H | 31.908250000 | 32.546687000 | 50.934820000 |
| C | 33.788462000 | 33.240147000 | 50.143269000 |
| O | 34.086309000 | 34.330665000 | 49.576351000 |
| O | 34.575794000 | 32.538962000 | 50.843907000 |
| C | 37.016938000 | 36.722358000 | 55.966838000 |
| H | 38.010945000 | 36.888684000 | 56.402102000 |
| H | 36.347520000 | 36.518598000 | 56.815815000 |
| C | 37.088500000 | 35.465928000 | 55.069921000 |
| H | 37.671666000 | 35.691589000 | 54.169442000 |
| H | 37.657210000 | 34.691424000 | 55.601778000 |
| C | 35.708799000 | 34.905348000 | 54.679647000 |
| H | 35.212703000 | 34.508334000 | 55.579264000 |
| H | 35.064040000 | 35.720995000 | 54.325787000 |
| C | 35.675362000 | 33.845566000 | 53.573421000 |
| H | 34.646372000 | 33.541756000 | 53.369137000 |
| H | 36.068928000 | 34.222729000 | 52.628464000 |
| N | 36.446071000 | 32.595971000 | 53.872560000 |
| H | 36.060974000 | 31.759549000 | 53.286418000 |
| H | 37.459469000 | 32.630429000 | 53.562820000 |
| H | 36.404775000 | 32.339232000 | 54.860659000 |

|    |              |              |              |
|----|--------------|--------------|--------------|
| C  | 37.133525000 | 36.522604000 | 50.269592000 |
| H  | 36.071196000 | 36.563665000 | 50.009171000 |
| H  | 37.686464000 | 37.094157000 | 49.512287000 |
| C  | 37.629925000 | 35.093386000 | 50.205526000 |
| O  | 38.811653000 | 34.859204000 | 50.598630000 |
| N  | 36.805313000 | 34.176069000 | 49.742820000 |
| H  | 37.147581000 | 33.213614000 | 49.721651000 |
| H  | 35.771181000 | 34.335396000 | 49.631530000 |
| C  | 40.244620000 | 33.740364000 | 46.295640000 |
| H  | 39.748046000 | 34.008672000 | 45.352286000 |
| H  | 41.289530000 | 34.052655000 | 46.183550000 |
| C  | 40.247700000 | 32.231712000 | 46.363121000 |
| O  | 40.925052000 | 31.678609000 | 45.332867000 |
| O  | 39.697449000 | 31.531466000 | 47.193388000 |
| Mg | 39.789076000 | 33.169513000 | 51.113852000 |
| O  | 38.836042000 | 32.263685000 | 52.677799000 |
| P  | 39.233072000 | 30.748872000 | 52.506046000 |
| O  | 38.316922000 | 30.066158000 | 51.487182000 |
| O  | 39.649697000 | 30.026789000 | 53.750832000 |
| O  | 40.668898000 | 31.103482000 | 51.519401000 |
| P  | 42.248857000 | 31.002226000 | 51.877348000 |
| O  | 42.652239000 | 32.195646000 | 52.719692000 |
| O  | 42.735859000 | 29.624034000 | 52.144683000 |
| O  | 42.857277000 | 31.335517000 | 50.306349000 |
| P  | 42.716206000 | 32.697974000 | 49.507793000 |
| O  | 41.485336000 | 33.484960000 | 49.865678000 |
| O  | 42.857534000 | 32.295687000 | 47.995540000 |
| O  | 44.080316000 | 33.533693000 | 49.746883000 |
| O  | 35.647990000 | 30.580724000 | 52.334750000 |
| H  | 36.513414000 | 30.301456000 | 51.943773000 |
| H  | 35.179859000 | 31.114852000 | 51.644169000 |
| C  | 44.323084000 | 34.247009000 | 50.975619000 |
| H  | 44.112392000 | 33.614478000 | 51.842045000 |
| H  | 45.376298000 | 34.535764000 | 50.953435000 |
| H  | 43.706311000 | 35.152539000 | 51.004053000 |
| C  | 49.850241000 | 33.747972000 | 49.207004000 |
| H  | 49.281995000 | 33.941425000 | 50.125099000 |
| H  | 50.913891000 | 33.731987000 | 49.470569000 |
| H  | 49.684989000 | 34.595739000 | 48.530680000 |
| C  | 32.345668000 | 31.385014000 | 49.167308000 |
| H  | 32.953112000 | 30.637184000 | 49.686807000 |
| H  | 31.328027000 | 30.989289000 | 49.057602000 |
| H  | 32.764013000 | 31.518705000 | 48.162200000 |
| C  | 36.569706000 | 38.022298000 | 55.269595000 |

|   |              |              |              |
|---|--------------|--------------|--------------|
| H | 35.569309000 | 37.932317000 | 54.830273000 |
| H | 36.540921000 | 38.852334000 | 55.985142000 |
| H | 37.261738000 | 38.295623000 | 54.465189000 |
| C | 37.395932000 | 37.108521000 | 51.657053000 |
| H | 38.441237000 | 36.967216000 | 51.942294000 |
| H | 37.165953000 | 38.180384000 | 51.681140000 |
| H | 36.764633000 | 36.622192000 | 52.404992000 |
| C | 39.582529000 | 34.418979000 | 47.496449000 |
| H | 40.160726000 | 34.256796000 | 48.400495000 |
| H | 39.524797000 | 35.499031000 | 47.317467000 |
| H | 38.565121000 | 34.051513000 | 47.649468000 |
| C | 41.339002000 | 26.451004000 | 54.389998000 |
| H | 41.533026000 | 25.885741000 | 55.305669000 |
| H | 40.330286000 | 26.214348000 | 54.038670000 |
| C | 42.637668000 | 29.961499000 | 55.106191000 |
| H | 41.701881000 | 30.426512000 | 54.798771000 |
| H | 42.892418000 | 30.286858000 | 56.123082000 |
| H | 43.437408000 | 30.287645000 | 54.443393000 |
| C | 43.814000000 | 26.436999000 | 51.432997000 |
| H | 44.477368000 | 25.659158000 | 51.831124000 |
| H | 43.274760000 | 25.994235000 | 50.586606000 |
| C | 46.133661000 | 29.475761000 | 51.183400000 |
| H | 46.681816000 | 29.179467000 | 50.287009000 |
| H | 45.455895000 | 30.304038000 | 50.941697000 |
| H | 46.842178000 | 29.808027000 | 51.947770000 |
| O | 40.959497000 | 34.223483000 | 52.535266000 |
| H | 41.602778000 | 33.497620000 | 52.798026000 |
| H | 41.492686000 | 34.832624000 | 52.001520000 |
| H | 40.886850000 | 30.714340000 | 45.479916000 |
| O | 38.641115000 | 32.014338000 | 49.738487000 |
| H | 38.448391000 | 31.148040000 | 50.218929000 |
| H | 39.029863000 | 31.808674000 | 48.862078000 |

dissociative TS (-4203.584369 A.U.)

|   |              |              |              |
|---|--------------|--------------|--------------|
| C | 42.526834000 | 28.443807000 | 55.166180000 |
| O | 43.419090000 | 27.751466000 | 55.658550000 |
| N | 41.402681000 | 27.888793000 | 54.614162000 |
| H | 40.721668000 | 28.485840000 | 54.143143000 |
| C | 42.363106000 | 25.934204000 | 53.338878000 |
| O | 42.607933000 | 24.731743000 | 53.264045000 |
| N | 42.939253000 | 26.862455000 | 52.518068000 |
| H | 42.620459000 | 27.832661000 | 52.511171000 |
| C | 44.687916000 | 27.546696000 | 50.817333000 |
| O | 44.792788000 | 27.654757000 | 49.593513000 |
| N | 45.421990000 | 28.303686000 | 51.683195000 |

|   |              |              |              |
|---|--------------|--------------|--------------|
| H | 45.043317000 | 28.374656000 | 52.621110000 |
| C | 49.403051000 | 32.436523000 | 48.545630000 |
| H | 50.004977000 | 32.262747000 | 47.641798000 |
| H | 49.618204000 | 31.595095000 | 49.219029000 |
| C | 47.914225000 | 32.413535000 | 48.167380000 |
| H | 47.313176000 | 32.551029000 | 49.078294000 |
| H | 47.689814000 | 33.279931000 | 47.527421000 |
| C | 47.486653000 | 31.131465000 | 47.432042000 |
| H | 48.099935000 | 31.025712000 | 46.525414000 |
| H | 47.697514000 | 30.248933000 | 48.052463000 |
| C | 46.006597000 | 31.117850000 | 47.012692000 |
| H | 45.780760000 | 32.048371000 | 46.474350000 |
| H | 45.821987000 | 30.295907000 | 46.313266000 |
| N | 45.032509000 | 30.984085000 | 48.117718000 |
| H | 45.404889000 | 31.396488000 | 48.972800000 |
| H | 43.723466000 | 31.917053000 | 48.029689000 |
| H | 44.854915000 | 30.004492000 | 48.356417000 |
| C | 32.937254000 | 31.162556000 | 50.565079000 |
| H | 32.133697000 | 31.187748000 | 51.316870000 |
| H | 33.391704000 | 30.168371000 | 50.649385000 |
| C | 33.992336000 | 32.206628000 | 50.998292000 |
| O | 33.925837000 | 33.354830000 | 50.471925000 |
| O | 34.842556000 | 31.849705000 | 51.868284000 |
| C | 37.441173000 | 37.081594000 | 56.117773000 |
| H | 38.357090000 | 37.615568000 | 56.402760000 |
| H | 36.924137000 | 36.844767000 | 57.058710000 |
| C | 37.830834000 | 35.768316000 | 55.409378000 |
| H | 38.158421000 | 36.000843000 | 54.386790000 |
| H | 38.704616000 | 35.335662000 | 55.915202000 |
| C | 36.699096000 | 34.721713000 | 55.366029000 |
| H | 36.609445000 | 34.233612000 | 56.347312000 |
| H | 35.736187000 | 35.218610000 | 55.190424000 |
| C | 36.836711000 | 33.676479000 | 54.260483000 |
| H | 36.013305000 | 32.958004000 | 54.258116000 |
| H | 36.823722000 | 34.147484000 | 53.276526000 |
| N | 38.105287000 | 32.884689000 | 54.307970000 |
| H | 38.195517000 | 32.309394000 | 55.147736000 |
| H | 38.154339000 | 32.234245000 | 53.425516000 |
| H | 38.960039000 | 33.452777000 | 54.180547000 |
| C | 37.014294000 | 36.208258000 | 50.466484000 |
| H | 35.932576000 | 36.228683000 | 50.299204000 |
| H | 37.501756000 | 36.580108000 | 49.557356000 |
| C | 37.484083000 | 34.777440000 | 50.676092000 |
| O | 38.725301000 | 34.565850000 | 50.805313000 |

|    |              |              |              |
|----|--------------|--------------|--------------|
| N  | 36.575537000 | 33.826524000 | 50.766263000 |
| H  | 36.877287000 | 32.875360000 | 50.976051000 |
| H  | 35.534607000 | 33.915642000 | 50.666561000 |
| C  | 40.465155000 | 34.017737000 | 46.312757000 |
| H  | 40.045793000 | 34.363264000 | 45.357096000 |
| H  | 41.461461000 | 34.468849000 | 46.385743000 |
| C  | 40.668908000 | 32.528333000 | 46.176982000 |
| O  | 41.522118000 | 32.219074000 | 45.174506000 |
| O  | 40.131195000 | 31.652920000 | 46.829558000 |
| Mg | 39.762959000 | 32.783596000 | 50.950777000 |
| O  | 38.359045000 | 31.683438000 | 52.062341000 |
| P  | 38.815154000 | 30.186684000 | 52.076216000 |
| O  | 38.593167000 | 29.448173000 | 50.793067000 |
| O  | 39.279117000 | 29.641128000 | 53.384076000 |
| O  | 40.787710000 | 31.062428000 | 51.351339000 |
| P  | 42.258900000 | 31.053734000 | 51.870026000 |
| O  | 42.492131000 | 32.195529000 | 52.872201000 |
| O  | 42.887265000 | 29.717915000 | 52.108936000 |
| O  | 43.117777000 | 31.633103000 | 50.447399000 |
| P  | 42.790335000 | 32.973982000 | 49.683991000 |
| O  | 41.458438000 | 33.595809000 | 50.027514000 |
| O  | 42.991034000 | 32.658219000 | 48.153110000 |
| O  | 44.012595000 | 33.987737000 | 49.987961000 |
| O  | 36.341983000 | 29.637907000 | 52.492861000 |
| H  | 36.467306000 | 29.155627000 | 51.660430000 |
| H  | 35.759238000 | 30.404514000 | 52.246639000 |
| C  | 44.146697000 | 34.540452000 | 51.312568000 |
| H  | 43.957419000 | 33.780797000 | 52.077529000 |
| H  | 45.170991000 | 34.913785000 | 51.385971000 |
| H  | 43.447224000 | 35.375042000 | 51.435046000 |
| C  | 49.850241000 | 33.747972000 | 49.207004000 |
| H  | 49.291031000 | 33.937187000 | 50.131427000 |
| H  | 50.916082000 | 33.721474000 | 49.461456000 |
| H  | 49.685944000 | 34.603732000 | 48.540535000 |
| C  | 32.345668000 | 31.385014000 | 49.167308000 |
| H  | 33.117641000 | 31.287921000 | 48.395055000 |
| H  | 31.553160000 | 30.657758000 | 48.948094000 |
| H  | 31.933743000 | 32.395178000 | 49.088589000 |
| C  | 36.569706000 | 38.022298000 | 55.269595000 |
| H  | 35.646711000 | 37.535832000 | 54.932550000 |
| H  | 36.280187000 | 38.909729000 | 55.844439000 |
| H  | 37.110437000 | 38.362117000 | 54.379950000 |
| C  | 37.395932000 | 37.108521000 | 51.657053000 |
| H  | 38.473053000 | 37.060848000 | 51.842814000 |

|                                            |              |              |              |
|--------------------------------------------|--------------|--------------|--------------|
| H                                          | 37.123310000 | 38.150661000 | 51.456446000 |
| H                                          | 36.869554000 | 36.794822000 | 52.562954000 |
| C                                          | 39.582529000 | 34.418979000 | 47.496450000 |
| H                                          | 40.085895000 | 34.225789000 | 48.440456000 |
| H                                          | 39.368404000 | 35.492815000 | 47.443127000 |
| H                                          | 38.629701000 | 33.882709000 | 47.484437000 |
| C                                          | 41.339001000 | 26.451005000 | 54.389999000 |
| H                                          | 41.548854000 | 25.903056000 | 55.311437000 |
| H                                          | 40.333090000 | 26.194799000 | 54.045534000 |
| C                                          | 42.637667000 | 29.961499000 | 55.106191000 |
| H                                          | 41.706638000 | 30.450065000 | 54.815600000 |
| H                                          | 42.952699000 | 30.322147000 | 56.092176000 |
| H                                          | 43.398897000 | 30.230717000 | 54.376959000 |
| C                                          | 43.814000000 | 26.436999000 | 51.432997000 |
| H                                          | 44.460972000 | 25.637399000 | 51.813270000 |
| H                                          | 43.243024000 | 26.017219000 | 50.596366000 |
| C                                          | 46.133661000 | 29.475761000 | 51.183400000 |
| H                                          | 46.629027000 | 29.207111000 | 50.248873000 |
| H                                          | 45.442877000 | 30.310366000 | 51.014048000 |
| H                                          | 46.886702000 | 29.776236000 | 51.918670000 |
| O                                          | 40.438988000 | 33.677606000 | 52.859802000 |
| H                                          | 41.307747000 | 33.107891000 | 52.969777000 |
| H                                          | 40.732371000 | 34.551220000 | 52.557196000 |
| H                                          | 41.594854000 | 31.245769000 | 45.183588000 |
| O                                          | 38.855561000 | 31.818913000 | 49.315376000 |
| H                                          | 38.716143000 | 30.889324000 | 49.630028000 |
| H                                          | 39.326336000 | 31.758919000 | 48.458065000 |
| <u>dissociative Pr (-4203.609837 A.U.)</u> |              |              |              |
| C                                          | 42.486551000 | 28.452129000 | 55.203862000 |
| O                                          | 43.332092000 | 27.754223000 | 55.763447000 |
| N                                          | 41.383763000 | 27.891885000 | 54.605554000 |
| H                                          | 40.730119000 | 28.472833000 | 54.087355000 |
| C                                          | 42.356693000 | 25.939925000 | 53.330791000 |
| O                                          | 42.575548000 | 24.732932000 | 53.237525000 |
| N                                          | 42.955469000 | 26.869404000 | 52.529142000 |
| H                                          | 42.662182000 | 27.849684000 | 52.528921000 |
| C                                          | 44.721956000 | 27.523445000 | 50.821813000 |
| O                                          | 44.862189000 | 27.594384000 | 49.598965000 |
| N                                          | 45.440220000 | 28.293766000 | 51.690714000 |
| H                                          | 45.000482000 | 28.416787000 | 52.596108000 |
| C                                          | 49.401361000 | 32.439959000 | 48.539909000 |
| H                                          | 49.995871000 | 32.275374000 | 47.629328000 |
| H                                          | 49.625505000 | 31.594210000 | 49.204867000 |
| C                                          | 47.909288000 | 32.414588000 | 48.174691000 |



|   |              |              |              |
|---|--------------|--------------|--------------|
| H | 47.315525000 | 32.534712000 | 49.092554000 |
| H | 47.675634000 | 33.289127000 | 47.549005000 |
| C | 47.481258000 | 31.141417000 | 47.424773000 |
| H | 48.097590000 | 31.044474000 | 46.518824000 |
| H | 47.688459000 | 30.252224000 | 48.036805000 |
| C | 46.001889000 | 31.134911000 | 47.000134000 |
| H | 45.779640000 | 32.073206000 | 46.473532000 |
| H | 45.821799000 | 30.324169000 | 46.286160000 |
| N | 45.018597000 | 30.983831000 | 48.091121000 |
| H | 45.351201000 | 31.435637000 | 48.942648000 |
| H | 43.629411000 | 31.870295000 | 47.988324000 |
| H | 44.883902000 | 30.003201000 | 48.350482000 |
| C | 33.305494000 | 31.052004000 | 50.314509000 |
| H | 32.831705000 | 30.390298000 | 51.051751000 |
| H | 34.186966000 | 30.503481000 | 49.952542000 |
| C | 33.808396000 | 32.291391000 | 51.038047000 |
| O | 33.573803000 | 33.428199000 | 50.659111000 |
| O | 34.548351000 | 32.107611000 | 52.137129000 |
| C | 37.687081000 | 37.261540000 | 56.001626000 |
| H | 38.601508000 | 37.869218000 | 55.972049000 |
| H | 37.427406000 | 37.157913000 | 57.065191000 |
| C | 37.984913000 | 35.868486000 | 55.413908000 |
| H | 38.053117000 | 35.952314000 | 54.320541000 |
| H | 38.975684000 | 35.535900000 | 55.748811000 |
| C | 36.940891000 | 34.799068000 | 55.782119000 |
| H | 37.115954000 | 34.457648000 | 56.813383000 |
| H | 35.934894000 | 35.243107000 | 55.776432000 |
| C | 36.906163000 | 33.596271000 | 54.825385000 |
| H | 36.116514000 | 32.902249000 | 55.137679000 |
| H | 36.621254000 | 33.945635000 | 53.826245000 |
| N | 38.141547000 | 32.816825000 | 54.670376000 |
| H | 38.408605000 | 32.342306000 | 55.530551000 |
| H | 38.071942000 | 31.908713000 | 53.259357000 |
| H | 38.940292000 | 33.373650000 | 54.353440000 |
| C | 37.171732000 | 36.174641000 | 50.455192000 |
| H | 36.130241000 | 36.231442000 | 50.119110000 |
| H | 37.814423000 | 36.473682000 | 49.621103000 |
| C | 37.537271000 | 34.747098000 | 50.821672000 |
| O | 38.739409000 | 34.425655000 | 50.928063000 |
| N | 36.540961000 | 33.904201000 | 51.090937000 |
| H | 36.775747000 | 32.962702000 | 51.405106000 |
| H | 35.557615000 | 34.134835000 | 50.983315000 |
| C | 40.439691000 | 33.875008000 | 46.352554000 |
| H | 40.073334000 | 34.212823000 | 45.372449000 |

|    |              |              |              |
|----|--------------|--------------|--------------|
| H  | 41.474606000 | 34.226008000 | 46.428409000 |
| C  | 40.497741000 | 32.367272000 | 46.294818000 |
| O  | 41.321150000 | 31.928270000 | 45.314702000 |
| O  | 39.875077000 | 31.581668000 | 46.983954000 |
| Mg | 39.712390000 | 32.516275000 | 51.109497000 |
| O  | 38.016512000 | 31.600267000 | 52.285113000 |
| P  | 37.665037000 | 29.965131000 | 52.168536000 |
| O  | 37.612521000 | 29.687008000 | 50.692375000 |
| O  | 38.385222000 | 29.180292000 | 53.216437000 |
| O  | 40.863200000 | 30.933704000 | 51.429154000 |
| P  | 42.325749000 | 31.014302000 | 51.887503000 |
| O  | 42.571246000 | 32.178001000 | 52.869533000 |
| O  | 43.039901000 | 29.715177000 | 52.136717000 |
| O  | 43.159161000 | 31.614556000 | 50.431337000 |
| P  | 42.689390000 | 32.897655000 | 49.652685000 |
| O  | 41.322370000 | 33.420984000 | 50.014860000 |
| O  | 42.868122000 | 32.563688000 | 48.115593000 |
| O  | 43.836254000 | 34.019600000 | 49.880800000 |
| O  | 36.038846000 | 30.000601000 | 52.691240000 |
| H  | 36.022426000 | 29.537857000 | 53.543668000 |
| H  | 34.928274000 | 31.191757000 | 52.270032000 |
| C  | 43.983283000 | 34.591422000 | 51.195347000 |
| H  | 43.857086000 | 33.831160000 | 51.973426000 |
| H  | 44.988624000 | 35.019067000 | 51.234389000 |
| H  | 43.245435000 | 35.390268000 | 51.333530000 |
| C  | 49.850241000 | 33.747972000 | 49.207004000 |
| H  | 49.298477000 | 33.928563000 | 50.137567000 |
| H  | 50.918484000 | 33.723498000 | 49.451942000 |
| H  | 49.676996000 | 34.607995000 | 48.548212000 |
| C  | 32.345668000 | 31.385014000 | 49.167308000 |
| H  | 32.830801000 | 32.034023000 | 48.433201000 |
| H  | 32.021679000 | 30.468440000 | 48.662981000 |
| H  | 31.460019000 | 31.910543000 | 49.537823000 |
| C  | 36.569706000 | 38.022298000 | 55.269595000 |
| H  | 35.640494000 | 37.441679000 | 55.225199000 |
| H  | 36.340411000 | 38.968014000 | 55.775515000 |
| H  | 36.863852000 | 38.259159000 | 54.242172000 |
| C  | 37.395932000 | 37.108520000 | 51.657053000 |
| H  | 38.430725000 | 37.041121000 | 52.006331000 |
| H  | 37.191176000 | 38.149651000 | 51.383346000 |
| H  | 36.732080000 | 36.838425000 | 52.482837000 |
| C  | 39.582529000 | 34.418979000 | 47.496449000 |
| H  | 40.031421000 | 34.196228000 | 48.462805000 |
| H  | 39.493315000 | 35.507846000 | 47.398882000 |

|   |              |              |              |
|---|--------------|--------------|--------------|
| H | 38.575734000 | 33.990257000 | 47.473209000 |
| C | 41.339000000 | 26.451005000 | 54.389998000 |
| H | 41.567397000 | 25.921050000 | 55.316615000 |
| H | 40.333691000 | 26.176819000 | 54.058493000 |
| C | 42.637669000 | 29.961500000 | 55.106192000 |
| H | 41.723288000 | 30.474274000 | 54.801933000 |
| H | 42.962407000 | 30.338373000 | 56.082197000 |
| H | 43.401247000 | 30.190086000 | 54.365446000 |
| C | 43.814001000 | 26.436999000 | 51.432997000 |
| H | 44.438909000 | 25.612854000 | 51.797461000 |
| H | 43.226435000 | 26.044559000 | 50.594669000 |
| C | 46.133661000 | 29.475761000 | 51.183400000 |
| H | 46.656512000 | 29.204502000 | 50.264525000 |
| H | 45.423193000 | 30.286758000 | 50.988558000 |
| H | 46.863167000 | 29.806776000 | 51.929397000 |
| O | 40.414428000 | 33.495711000 | 52.896024000 |
| H | 41.326192000 | 32.989938000 | 52.995794000 |
| H | 40.637438000 | 34.369930000 | 52.540181000 |
| H | 41.312143000 | 30.954763000 | 45.384011000 |
| O | 38.626064000 | 31.814827000 | 49.507785000 |
| H | 38.268752000 | 30.921620000 | 49.797441000 |
| H | 39.103335000 | 31.693202000 | 48.662630000 |

### 3. Two-lytic-water model for AceK

associative Re (-4203.625289 A.U.)

|   |              |              |              |
|---|--------------|--------------|--------------|
| C | 42.532260000 | 28.442607000 | 55.145809000 |
| O | 43.439963000 | 27.751280000 | 55.609227000 |
| N | 41.404428000 | 27.891649000 | 54.602002000 |
| H | 40.687478000 | 28.491071000 | 54.184790000 |
| C | 42.362810000 | 25.929231000 | 53.341968000 |
| O | 42.603160000 | 24.727207000 | 53.264836000 |
| N | 42.943962000 | 26.857042000 | 52.523197000 |
| H | 42.635576000 | 27.827432000 | 52.531405000 |
| C | 44.675277000 | 27.556531000 | 50.814690000 |
| O | 44.722851000 | 27.711414000 | 49.593754000 |
| N | 45.458607000 | 28.276945000 | 51.671616000 |
| H | 45.139271000 | 28.298859000 | 52.633592000 |
| C | 49.430973000 | 32.450043000 | 48.503521000 |
| H | 50.059945000 | 32.297665000 | 47.614602000 |
| H | 49.628827000 | 31.594879000 | 49.164974000 |
| C | 47.954032000 | 32.434252000 | 48.083992000 |
| H | 47.329457000 | 32.576350000 | 48.978106000 |
| H | 47.751027000 | 33.302001000 | 47.438833000 |
| C | 47.536998000 | 31.154945000 | 47.338377000 |

|   |              |              |              |
|---|--------------|--------------|--------------|
| H | 48.151917000 | 31.056664000 | 46.432369000 |
| H | 47.750157000 | 30.269700000 | 47.954534000 |
| C | 46.057401000 | 31.139601000 | 46.922012000 |
| H | 45.832616000 | 32.063544000 | 46.372259000 |
| H | 45.864372000 | 30.309131000 | 46.235733000 |
| N | 45.097839000 | 31.027912000 | 48.045005000 |
| H | 45.520351000 | 31.378183000 | 48.904954000 |
| H | 43.881867000 | 32.066424000 | 48.033828000 |
| H | 44.852165000 | 30.055004000 | 48.244314000 |
| C | 32.957203000 | 31.323909000 | 50.571273000 |
| H | 32.184712000 | 31.528375000 | 51.327685000 |
| H | 33.319259000 | 30.312657000 | 50.794102000 |
| C | 34.126825000 | 32.292398000 | 50.866659000 |
| O | 34.784494000 | 32.058818000 | 51.928688000 |
| O | 34.356658000 | 33.246737000 | 50.073140000 |
| C | 37.332905000 | 36.925131000 | 56.037015000 |
| H | 38.325710000 | 37.315548000 | 56.296657000 |
| H | 36.827190000 | 36.730713000 | 56.994062000 |
| C | 37.514756000 | 35.585983000 | 55.285352000 |
| H | 37.834808000 | 35.782209000 | 54.255124000 |
| H | 38.349752000 | 35.043425000 | 55.751036000 |
| C | 36.260129000 | 34.690739000 | 55.286639000 |
| H | 36.081186000 | 34.318743000 | 56.306770000 |
| H | 35.377344000 | 35.291513000 | 55.030441000 |
| C | 36.266962000 | 33.519333000 | 54.298214000 |
| H | 35.339771000 | 32.947717000 | 54.363313000 |
| H | 36.325695000 | 33.866806000 | 53.267365000 |
| N | 37.402130000 | 32.547224000 | 54.501972000 |
| H | 37.071886000 | 31.504805000 | 54.631574000 |
| H | 38.045662000 | 32.484007000 | 53.672078000 |
| H | 37.977008000 | 32.787632000 | 55.310919000 |
| C | 37.088966000 | 36.110792000 | 50.532633000 |
| H | 36.011714000 | 35.978886000 | 50.390418000 |
| H | 37.507291000 | 36.479132000 | 49.586865000 |
| C | 37.747048000 | 34.780860000 | 50.841121000 |
| O | 38.968528000 | 34.797193000 | 51.167648000 |
| N | 37.008670000 | 33.685832000 | 50.782032000 |
| H | 37.423785000 | 32.808015000 | 51.094046000 |
| H | 35.986365000 | 33.659266000 | 50.534846000 |
| C | 38.773618000 | 33.115483000 | 47.452799000 |
| H | 37.698906000 | 33.308799000 | 47.349597000 |
| H | 39.049215000 | 32.506238000 | 46.581550000 |
| C | 38.947073000 | 32.249071000 | 48.688394000 |
| O | 38.171450000 | 31.201697000 | 48.733185000 |

|    |              |              |              |
|----|--------------|--------------|--------------|
| O  | 39.765059000 | 32.547660000 | 49.565197000 |
| Mg | 40.308441000 | 33.299135000 | 51.438732000 |
| O  | 39.035369000 | 32.000681000 | 52.310564000 |
| P  | 39.145480000 | 30.446366000 | 52.070447000 |
| O  | 38.139391000 | 29.986696000 | 51.014440000 |
| O  | 39.261620000 | 29.661397000 | 53.364616000 |
| O  | 40.626712000 | 30.232488000 | 51.247850000 |
| P  | 42.061242000 | 30.799152000 | 51.657779000 |
| O  | 41.878336000 | 32.091041000 | 52.452382000 |
| O  | 43.019820000 | 29.744130000 | 52.089653000 |
| O  | 42.599861000 | 31.366859000 | 50.149897000 |
| P  | 42.993300000 | 32.883697000 | 49.819461000 |
| O  | 42.054149000 | 33.932209000 | 50.351021000 |
| O  | 43.229928000 | 32.861842000 | 48.270984000 |
| O  | 44.500214000 | 33.085716000 | 50.400483000 |
| O  | 36.860624000 | 29.980127000 | 54.702593000 |
| H  | 37.751848000 | 29.697377000 | 54.375575000 |
| H  | 36.277600000 | 29.739854000 | 53.916281000 |
| C  | 44.722753000 | 33.594577000 | 51.725566000 |
| H  | 44.239905000 | 32.961611000 | 52.473518000 |
| H  | 45.804678000 | 33.593758000 | 51.873587000 |
| H  | 44.344690000 | 34.618992000 | 51.803187000 |
| C  | 49.850241000 | 33.747972000 | 49.207004000 |
| H  | 49.261515000 | 33.912740000 | 50.117796000 |
| H  | 50.907855000 | 33.722425000 | 49.493655000 |
| H  | 49.700712000 | 34.617937000 | 48.555726000 |
| C  | 32.345667000 | 31.385012000 | 49.167307000 |
| H  | 33.083421000 | 31.108203000 | 48.405912000 |
| H  | 31.491394000 | 30.701673000 | 49.079379000 |
| H  | 32.008700000 | 32.400608000 | 48.934881000 |
| C  | 36.569704000 | 38.022301000 | 55.269598000 |
| H  | 35.575031000 | 37.686082000 | 54.953118000 |
| H  | 36.432036000 | 38.908826000 | 55.899680000 |
| H  | 37.117997000 | 38.330129000 | 54.373239000 |
| C  | 37.395932000 | 37.108521000 | 51.657053000 |
| H  | 38.473010000 | 37.171498000 | 51.827933000 |
| H  | 37.018732000 | 38.106650000 | 51.405368000 |
| H  | 36.913296000 | 36.798340000 | 52.586957000 |
| C  | 39.582526000 | 34.418975000 | 47.496456000 |
| H  | 40.654915000 | 34.213632000 | 47.551634000 |
| H  | 39.385458000 | 35.012226000 | 46.596143000 |
| H  | 39.321724000 | 35.017349000 | 48.373084000 |
| C  | 41.338999000 | 26.451006000 | 54.389996000 |
| H  | 41.547202000 | 25.908406000 | 55.315092000 |

|                                           |              |              |              |
|-------------------------------------------|--------------|--------------|--------------|
| H                                         | 40.333421000 | 26.193809000 | 54.045933000 |
| C                                         | 42.637672000 | 29.961498000 | 55.106179000 |
| H                                         | 41.708422000 | 30.450117000 | 54.803978000 |
| H                                         | 42.936942000 | 30.313713000 | 56.099555000 |
| H                                         | 43.414603000 | 30.230781000 | 54.390068000 |
| C                                         | 43.813996000 | 26.436997000 | 51.433001000 |
| H                                         | 44.467093000 | 25.640050000 | 51.808456000 |
| H                                         | 43.239814000 | 26.016799000 | 50.599037000 |
| C                                         | 46.133664000 | 29.475766000 | 51.183401000 |
| H                                         | 46.615389000 | 29.240569000 | 50.232638000 |
| H                                         | 45.423765000 | 30.300245000 | 51.044323000 |
| H                                         | 46.896688000 | 29.774363000 | 51.908930000 |
| O                                         | 41.078599000 | 34.461350000 | 53.129907000 |
| H                                         | 41.657230000 | 33.688494000 | 53.312468000 |
| H                                         | 41.648482000 | 35.101411000 | 52.673354000 |
| H                                         | 38.235728000 | 30.691677000 | 49.641736000 |
| O                                         | 35.596499000 | 29.532836000 | 52.390915000 |
| H                                         | 36.391252000 | 29.525869000 | 51.815131000 |
| H                                         | 35.205235000 | 30.434308000 | 52.227394000 |
| <u>associative TS (-4203.575555 A.U.)</u> |              |              |              |
| C                                         | 42.477963000 | 28.449688000 | 55.244369000 |
| O                                         | 43.293870000 | 27.768096000 | 55.861204000 |
| N                                         | 41.393803000 | 27.891519000 | 54.612157000 |
| H                                         | 40.821183000 | 28.479771000 | 54.011027000 |
| C                                         | 42.380008000 | 25.924072000 | 53.356787000 |
| O                                         | 42.615416000 | 24.720281000 | 53.291381000 |
| N                                         | 42.974676000 | 26.853800000 | 52.549951000 |
| H                                         | 42.613305000 | 27.810300000 | 52.503349000 |
| C                                         | 44.705335000 | 27.531203000 | 50.821224000 |
| O                                         | 44.857107000 | 27.599406000 | 49.601333000 |
| N                                         | 45.400241000 | 28.322131000 | 51.690406000 |
| H                                         | 45.001712000 | 28.402251000 | 52.618262000 |
| C                                         | 49.413421000 | 32.483420000 | 48.455588000 |
| H                                         | 50.010486000 | 32.379649000 | 47.538091000 |
| H                                         | 49.639198000 | 31.597848000 | 49.066156000 |
| C                                         | 47.922552000 | 32.480084000 | 48.089679000 |
| H                                         | 47.331326000 | 32.570733000 | 49.012698000 |
| H                                         | 47.692943000 | 33.379702000 | 47.499252000 |
| C                                         | 47.481484000 | 31.240362000 | 47.293904000 |
| H                                         | 48.072041000 | 31.185593000 | 46.367942000 |
| H                                         | 47.706960000 | 30.325256000 | 47.860081000 |
| C                                         | 45.990635000 | 31.252215000 | 46.917431000 |
| H                                         | 45.758031000 | 32.204240000 | 46.420966000 |
| H                                         | 45.775770000 | 30.459626000 | 46.193497000 |

|    |              |              |              |
|----|--------------|--------------|--------------|
| N  | 45.055893000 | 31.086718000 | 48.050710000 |
| H  | 45.465056000 | 31.458433000 | 48.908018000 |
| H  | 43.761547000 | 32.107995000 | 48.099146000 |
| H  | 44.863625000 | 30.101616000 | 48.243912000 |
| C  | 32.383015000 | 32.673237000 | 50.008812000 |
| H  | 31.961940000 | 33.508687000 | 49.438791000 |
| H  | 31.773693000 | 32.529240000 | 50.910674000 |
| C  | 33.814059000 | 33.039621000 | 50.452437000 |
| O  | 34.342618000 | 32.329035000 | 51.359914000 |
| O  | 34.370804000 | 34.014735000 | 49.871490000 |
| C  | 37.157495000 | 36.798156000 | 55.993028000 |
| H  | 38.180576000 | 37.042472000 | 56.307853000 |
| H  | 36.593096000 | 36.615745000 | 56.919541000 |
| C  | 37.204420000 | 35.493271000 | 55.168736000 |
| H  | 37.639618000 | 35.696444000 | 54.182773000 |
| H  | 37.904274000 | 34.805436000 | 55.662875000 |
| C  | 35.841483000 | 34.793083000 | 55.014757000 |
| H  | 35.502143000 | 34.456280000 | 56.007143000 |
| H  | 35.084386000 | 35.508842000 | 54.668261000 |
| C  | 35.807426000 | 33.610887000 | 54.035123000 |
| H  | 34.839837000 | 33.104282000 | 54.069154000 |
| H  | 35.940510000 | 33.928389000 | 53.000247000 |
| N  | 36.859297000 | 32.585764000 | 54.294231000 |
| H  | 36.788549000 | 31.551543000 | 53.693303000 |
| H  | 37.782901000 | 32.876828000 | 53.949286000 |
| H  | 36.939004000 | 32.367553000 | 55.289028000 |
| C  | 37.220257000 | 36.153332000 | 50.477020000 |
| H  | 36.172479000 | 36.068971000 | 50.173096000 |
| H  | 37.796069000 | 36.514699000 | 49.615140000 |
| C  | 37.770896000 | 34.794074000 | 50.851116000 |
| O  | 38.924207000 | 34.744550000 | 51.361943000 |
| N  | 36.988046000 | 33.748141000 | 50.649478000 |
| H  | 37.316009000 | 32.830044000 | 50.934529000 |
| H  | 35.989897000 | 33.848536000 | 50.327904000 |
| C  | 39.540345000 | 32.896638000 | 47.296191000 |
| H  | 38.797758000 | 32.595568000 | 46.550494000 |
| H  | 40.517280000 | 32.542812000 | 46.938577000 |
| C  | 39.266174000 | 32.153523000 | 48.589028000 |
| O  | 38.672914000 | 30.997793000 | 48.464522000 |
| O  | 39.605691000 | 32.639376000 | 49.669201000 |
| Mg | 40.197237000 | 33.184856000 | 51.587294000 |
| O  | 38.857208000 | 31.945312000 | 52.457442000 |
| P  | 38.583272000 | 30.468838000 | 52.067977000 |
| O  | 37.885004000 | 30.112702000 | 50.753724000 |

|   |              |              |              |
|---|--------------|--------------|--------------|
| O | 39.149573000 | 29.299049000 | 53.099708000 |
| O | 40.304821000 | 30.222283000 | 51.217636000 |
| P | 41.734534000 | 30.659641000 | 51.640298000 |
| O | 41.689789000 | 31.938494000 | 52.496964000 |
| O | 42.698885000 | 29.581241000 | 52.033782000 |
| O | 42.361601000 | 31.291275000 | 50.151760000 |
| P | 42.849814000 | 32.786224000 | 49.931468000 |
| O | 41.966827000 | 33.867674000 | 50.497128000 |
| O | 43.109518000 | 32.867184000 | 48.378963000 |
| O | 44.364172000 | 32.880179000 | 50.530284000 |
| O | 37.042251000 | 30.391765000 | 53.098972000 |
| H | 38.381851000 | 29.128562000 | 53.676843000 |
| H | 36.262232000 | 30.087258000 | 52.536905000 |
| C | 44.594574000 | 33.312293000 | 51.880736000 |
| H | 44.040324000 | 32.691367000 | 52.587676000 |
| H | 45.668733000 | 33.214137000 | 52.053096000 |
| H | 44.301786000 | 34.361227000 | 51.994706000 |
| C | 49.850241000 | 33.747972000 | 49.207004000 |
| H | 49.294134000 | 33.862808000 | 50.145483000 |
| H | 50.917860000 | 33.717335000 | 49.453594000 |
| H | 49.671190000 | 34.647718000 | 48.605512000 |
| C | 32.345667000 | 31.385012000 | 49.167307000 |
| H | 32.798279000 | 30.552681000 | 49.717115000 |
| H | 31.316528000 | 31.108241000 | 48.906265000 |
| H | 32.906866000 | 31.514747000 | 48.234053000 |
| C | 36.569704000 | 38.022301000 | 55.269598000 |
| H | 35.543591000 | 37.844430000 | 54.926130000 |
| H | 36.545725000 | 38.891304000 | 55.937809000 |
| H | 37.171056000 | 38.289218000 | 54.394080000 |
| C | 37.395932000 | 37.108521000 | 51.657053000 |
| H | 38.434018000 | 37.110298000 | 51.997834000 |
| H | 37.115304000 | 38.131840000 | 51.379770000 |
| H | 36.755953000 | 36.810203000 | 52.492249000 |
| C | 39.582526000 | 34.418975000 | 47.496456000 |
| H | 40.328555000 | 34.683549000 | 48.248749000 |
| H | 39.838794000 | 34.917160000 | 46.554604000 |
| H | 38.608659000 | 34.796308000 | 47.825874000 |
| C | 41.338998000 | 26.451007000 | 54.389999000 |
| H | 41.532887000 | 25.917801000 | 55.322278000 |
| H | 40.340089000 | 26.187004000 | 54.030714000 |
| C | 42.637671000 | 29.961496000 | 55.106177000 |
| H | 41.694837000 | 30.477647000 | 54.907931000 |
| H | 43.093968000 | 30.345348000 | 56.022989000 |
| H | 43.294086000 | 30.162112000 | 54.257114000 |



|                                           |              |              |              |
|-------------------------------------------|--------------|--------------|--------------|
| C                                         | 43.813997000 | 26.436998000 | 51.433000000 |
| H                                         | 44.449025000 | 25.611426000 | 51.775932000 |
| H                                         | 43.214101000 | 26.051780000 | 50.599912000 |
| C                                         | 46.133664000 | 29.475766000 | 51.183401000 |
| H                                         | 46.620017000 | 29.188554000 | 50.249991000 |
| H                                         | 45.463604000 | 30.325497000 | 50.999949000 |
| H                                         | 46.894957000 | 29.769380000 | 51.913387000 |
| O                                         | 41.053976000 | 34.324908000 | 53.276687000 |
| H                                         | 41.594628000 | 33.514350000 | 53.408066000 |
| H                                         | 41.621328000 | 34.914774000 | 52.752848000 |
| H                                         | 38.483341000 | 30.586976000 | 49.397012000 |
| O                                         | 35.130016000 | 29.751447000 | 51.364899000 |
| H                                         | 35.902404000 | 29.786736000 | 50.764307000 |
| H                                         | 34.731979000 | 30.660445000 | 51.304121000 |
| <u>associative Pr (-4203.661440 A.U.)</u> |              |              |              |
| C                                         | 42.454326000 | 28.455614000 | 55.283817000 |
| O                                         | 43.207401000 | 27.781401000 | 55.977321000 |
| N                                         | 41.399522000 | 27.894824000 | 54.597207000 |
| H                                         | 40.880307000 | 28.481397000 | 53.954124000 |
| C                                         | 42.332211000 | 25.907739000 | 53.327341000 |
| O                                         | 42.545802000 | 24.699647000 | 53.268159000 |
| N                                         | 42.905114000 | 26.830514000 | 52.501113000 |
| H                                         | 42.574798000 | 27.792689000 | 52.511087000 |
| C                                         | 45.101136000 | 27.265031000 | 51.242875000 |
| O                                         | 46.127492000 | 26.715026000 | 50.840389000 |
| N                                         | 45.014807000 | 28.600538000 | 51.459974000 |
| H                                         | 44.105109000 | 29.041301000 | 51.650066000 |
| C                                         | 48.889297000 | 32.788976000 | 48.488838000 |
| H                                         | 49.142322000 | 32.757959000 | 47.419136000 |
| H                                         | 49.048470000 | 31.768995000 | 48.865707000 |
| C                                         | 47.399379000 | 33.147035000 | 48.636414000 |
| H                                         | 47.136195000 | 33.167841000 | 49.703778000 |
| H                                         | 47.223307000 | 34.165505000 | 48.261222000 |
| C                                         | 46.494131000 | 32.159352000 | 47.879622000 |
| H                                         | 46.778294000 | 32.157958000 | 46.818411000 |
| H                                         | 46.682406000 | 31.137326000 | 48.239275000 |
| C                                         | 44.985570000 | 32.428911000 | 47.937971000 |
| H                                         | 44.751690000 | 33.439863000 | 47.590095000 |
| H                                         | 44.464508000 | 31.723301000 | 47.284101000 |
| N                                         | 44.403509000 | 32.286899000 | 49.306609000 |
| H                                         | 45.046432000 | 31.820142000 | 49.948848000 |
| H                                         | 44.104593000 | 33.209767000 | 49.748923000 |
| H                                         | 43.468018000 | 31.719273000 | 49.363970000 |
| C                                         | 31.860538000 | 32.162689000 | 50.401404000 |

|    |              |              |              |
|----|--------------|--------------|--------------|
| H  | 31.342401000 | 33.077842000 | 50.098754000 |
| H  | 31.158469000 | 31.539523000 | 50.969642000 |
| C  | 33.021689000 | 32.548517000 | 51.321617000 |
| O  | 33.596884000 | 31.579398000 | 51.940039000 |
| O  | 33.361646000 | 33.751801000 | 51.406909000 |
| C  | 36.354482000 | 36.626259000 | 55.880823000 |
| H  | 37.284392000 | 36.285176000 | 56.355949000 |
| H  | 35.609514000 | 36.702534000 | 56.686861000 |
| C  | 35.877173000 | 35.574098000 | 54.865320000 |
| H  | 35.014167000 | 35.985983000 | 54.321964000 |
| H  | 36.662967000 | 35.395918000 | 54.121536000 |
| C  | 35.449640000 | 34.238140000 | 55.503700000 |
| H  | 36.324261000 | 33.691827000 | 55.881300000 |
| H  | 34.828580000 | 34.458822000 | 56.382633000 |
| C  | 34.610622000 | 33.339461000 | 54.575947000 |
| H  | 33.852511000 | 32.793632000 | 55.144981000 |
| H  | 34.084528000 | 33.931676000 | 53.820910000 |
| N  | 35.349562000 | 32.293262000 | 53.801457000 |
| H  | 34.696995000 | 31.980671000 | 52.986941000 |
| H  | 36.256546000 | 32.558750000 | 53.375959000 |
| H  | 35.569784000 | 31.448548000 | 54.336680000 |
| C  | 36.367301000 | 36.070952000 | 51.232749000 |
| H  | 35.457216000 | 36.120084000 | 51.844551000 |
| H  | 36.038313000 | 36.235267000 | 50.199050000 |
| C  | 36.943238000 | 34.671097000 | 51.336628000 |
| O  | 38.092829000 | 34.521364000 | 51.802276000 |
| N  | 36.176702000 | 33.664771000 | 50.905295000 |
| H  | 36.536935000 | 32.722951000 | 51.044521000 |
| H  | 35.160803000 | 33.790150000 | 50.842222000 |
| C  | 39.605107000 | 32.882290000 | 47.496492000 |
| H  | 39.138462000 | 32.463057000 | 46.599975000 |
| H  | 40.641956000 | 32.520260000 | 47.525875000 |
| C  | 38.945816000 | 32.281715000 | 48.719606000 |
| O  | 38.297808000 | 31.164492000 | 48.500003000 |
| O  | 39.032020000 | 32.831404000 | 49.819293000 |
| Mg | 39.361408000 | 32.900153000 | 51.864747000 |
| O  | 37.726828000 | 31.720655000 | 52.413791000 |
| P  | 37.490528000 | 30.247309000 | 52.005367000 |
| O  | 37.050071000 | 30.088637000 | 50.549886000 |
| O  | 38.790462000 | 29.392019000 | 52.387331000 |
| O  | 42.106363000 | 31.119757000 | 49.773730000 |
| P  | 41.955803000 | 30.964906000 | 51.288390000 |
| O  | 40.521993000 | 31.251492000 | 51.826005000 |
| O  | 42.535176000 | 29.718896000 | 51.936480000 |

|   |              |              |              |
|---|--------------|--------------|--------------|
| O | 42.889935000 | 32.238187000 | 51.941132000 |
| P | 42.587289000 | 33.832965000 | 51.749684000 |
| O | 41.106810000 | 34.091899000 | 52.046811000 |
| O | 43.189740000 | 34.351249000 | 50.468822000 |
| O | 43.496612000 | 34.449103000 | 52.955401000 |
| O | 36.355041000 | 29.646127000 | 52.982076000 |
| H | 39.591380000 | 29.955557000 | 52.149346000 |
| H | 35.603752000 | 29.259773000 | 52.432180000 |
| C | 43.257653000 | 34.077030000 | 54.308088000 |
| H | 43.274484000 | 32.988171000 | 54.429420000 |
| H | 44.061313000 | 34.516942000 | 54.905168000 |
| H | 42.299695000 | 34.474351000 | 54.668319000 |
| C | 49.850241000 | 33.747972000 | 49.207004000 |
| H | 49.651073000 | 33.776340000 | 50.285015000 |
| H | 50.891727000 | 33.437472000 | 49.067220000 |
| H | 49.750559000 | 34.771457000 | 48.825033000 |
| C | 32.345667000 | 31.385012000 | 49.167307000 |
| H | 32.841741000 | 30.454103000 | 49.458307000 |
| H | 31.505131000 | 31.130710000 | 48.510912000 |
| H | 33.057064000 | 31.981073000 | 48.583495000 |
| C | 36.569704000 | 38.022301000 | 55.269598000 |
| H | 35.653350000 | 38.387781000 | 54.789759000 |
| H | 36.855463000 | 38.746724000 | 56.041219000 |
| H | 37.360386000 | 38.012199000 | 54.513438000 |
| C | 37.395932000 | 37.108521000 | 51.657053000 |
| H | 38.257638000 | 37.100755000 | 50.983496000 |
| H | 36.958646000 | 38.113874000 | 51.646461000 |
| H | 37.776497000 | 36.903922000 | 52.658461000 |
| C | 39.582526000 | 34.418976000 | 47.496455000 |
| H | 40.073380000 | 34.807119000 | 48.392569000 |
| H | 40.106549000 | 34.805668000 | 46.615517000 |
| H | 38.555070000 | 34.799566000 | 47.474284000 |
| C | 41.338998000 | 26.451003000 | 54.389997000 |
| H | 41.579126000 | 25.944182000 | 55.325404000 |
| H | 40.324070000 | 26.174766000 | 54.089436000 |
| C | 42.637672000 | 29.961501000 | 55.106181000 |
| H | 41.688988000 | 30.497189000 | 55.242740000 |
| H | 43.360540000 | 30.309705000 | 55.846352000 |
| H | 42.988940000 | 30.166084000 | 54.090305000 |
| C | 43.813997000 | 26.436996000 | 51.433000000 |
| H | 44.120231000 | 25.409010000 | 51.627093000 |
| H | 43.290187000 | 26.444229000 | 50.463852000 |
| C | 46.133664000 | 29.475766000 | 51.183401000 |
| H | 47.058990000 | 29.049053000 | 51.582095000 |

|   |              |              |              |
|---|--------------|--------------|--------------|
| H | 46.290580000 | 29.627205000 | 50.102373000 |
| H | 45.949973000 | 30.441094000 | 51.667292000 |
| O | 39.712320000 | 33.088147000 | 54.055218000 |
| H | 40.066400000 | 32.186422000 | 54.145350000 |
| H | 40.478927000 | 33.622115000 | 53.748833000 |
| H | 37.880744000 | 30.776303000 | 49.350176000 |
| O | 34.489422000 | 29.087509000 | 51.178595000 |
| H | 35.223978000 | 29.355760000 | 50.584253000 |
| H | 34.016918000 | 29.934278000 | 51.365015000 |

dissociative Re (-4203.622033 A.U.)

|   |              |              |              |
|---|--------------|--------------|--------------|
| C | 42.534030000 | 28.442193000 | 55.165946000 |
| O | 43.418810000 | 27.750774000 | 55.671364000 |
| N | 41.413090000 | 27.890470000 | 54.602721000 |
| H | 40.761848000 | 28.505488000 | 54.111432000 |
| C | 42.359958000 | 25.920868000 | 53.341099000 |
| O | 42.589289000 | 24.716857000 | 53.258269000 |
| N | 42.950388000 | 26.849901000 | 52.530725000 |
| H | 42.636554000 | 27.818075000 | 52.540479000 |
| C | 44.686274000 | 27.549839000 | 50.819347000 |
| O | 44.762505000 | 27.683399000 | 49.597239000 |
| N | 45.448333000 | 28.286517000 | 51.680853000 |
| H | 45.102489000 | 28.331643000 | 52.632761000 |
| C | 49.405344000 | 32.464578000 | 48.492291000 |
| H | 50.027828000 | 32.310766000 | 47.598951000 |
| H | 49.592027000 | 31.599684000 | 49.144228000 |
| C | 47.926373000 | 32.476568000 | 48.079072000 |
| H | 47.306858000 | 32.618712000 | 48.976610000 |
| H | 47.733359000 | 33.354606000 | 47.445021000 |
| C | 47.488373000 | 31.212305000 | 47.319351000 |
| H | 48.090073000 | 31.123449000 | 46.403579000 |
| H | 47.702625000 | 30.315424000 | 47.918102000 |
| C | 46.002845000 | 31.213567000 | 46.924062000 |
| H | 45.771554000 | 32.153347000 | 46.405038000 |
| H | 45.796501000 | 30.402966000 | 46.218114000 |
| N | 45.060441000 | 31.072901000 | 48.059311000 |
| H | 45.506815000 | 31.382455000 | 48.922364000 |
| H | 43.845079000 | 32.107347000 | 48.093203000 |
| H | 44.812375000 | 30.095840000 | 48.232576000 |
| C | 33.135603000 | 31.164698000 | 50.462584000 |
| H | 32.455832000 | 31.181234000 | 51.327264000 |
| H | 33.592434000 | 30.166966000 | 50.476937000 |
| C | 34.261344000 | 32.179815000 | 50.768815000 |
| O | 35.039982000 | 31.876723000 | 51.727751000 |

|    |              |              |              |
|----|--------------|--------------|--------------|
| O  | 34.340731000 | 33.235795000 | 50.083116000 |
| C  | 37.350760000 | 36.902481000 | 55.986073000 |
| H  | 38.362320000 | 37.273551000 | 56.196824000 |
| H  | 36.892634000 | 36.710189000 | 56.967211000 |
| C  | 37.476538000 | 35.561983000 | 55.222495000 |
| H  | 37.745021000 | 35.754400000 | 54.177652000 |
| H  | 38.329303000 | 35.012023000 | 55.644786000 |
| C  | 36.217786000 | 34.675322000 | 55.293002000 |
| H  | 36.073444000 | 34.345096000 | 56.332888000 |
| H  | 35.329047000 | 35.270358000 | 55.043967000 |
| C  | 36.183666000 | 33.456037000 | 54.360125000 |
| H  | 35.287367000 | 32.861838000 | 54.551104000 |
| H  | 36.137966000 | 33.739562000 | 53.307933000 |
| N  | 37.366303000 | 32.536105000 | 54.507994000 |
| H  | 37.108679000 | 31.478601000 | 54.574998000 |
| H  | 38.000186000 | 32.548792000 | 53.663011000 |
| H  | 37.933274000 | 32.758487000 | 55.327721000 |
| C  | 37.096247000 | 36.193800000 | 50.465532000 |
| H  | 36.020563000 | 36.083238000 | 50.297135000 |
| H  | 37.543104000 | 36.608016000 | 49.553139000 |
| C  | 37.739107000 | 34.855407000 | 50.745547000 |
| O  | 38.965189000 | 34.870782000 | 51.062738000 |
| N  | 36.994579000 | 33.766902000 | 50.700130000 |
| H  | 37.394540000 | 32.895792000 | 51.055239000 |
| H  | 35.970427000 | 33.740751000 | 50.472403000 |
| C  | 38.799280000 | 33.105152000 | 47.363545000 |
| H  | 37.718859000 | 33.277931000 | 47.277032000 |
| H  | 39.087828000 | 32.547043000 | 46.463610000 |
| C  | 39.021263000 | 32.218123000 | 48.567901000 |
| O  | 38.413117000 | 31.062646000 | 48.585832000 |
| O  | 39.750206000 | 32.607830000 | 49.479798000 |
| Mg | 40.234062000 | 33.340071000 | 51.307992000 |
| O  | 38.829208000 | 32.145247000 | 52.245412000 |
| P  | 39.438602000 | 30.704496000 | 52.086359000 |
| O  | 38.841527000 | 29.943904000 | 50.909450000 |
| O  | 39.648773000 | 29.965799000 | 53.389674000 |
| O  | 40.989150000 | 31.304645000 | 51.548755000 |
| P  | 42.550261000 | 31.102221000 | 51.948058000 |
| O  | 42.926841000 | 32.169761000 | 52.957576000 |
| O  | 42.954671000 | 29.679533000 | 52.080810000 |
| O  | 43.217932000 | 31.635392000 | 50.476842000 |
| P  | 43.162493000 | 33.118894000 | 49.878241000 |
| O  | 42.047910000 | 33.963769000 | 50.430648000 |
| O  | 43.191769000 | 32.903273000 | 48.326904000 |

|   |              |              |              |
|---|--------------|--------------|--------------|
| O | 44.613885000 | 33.763288000 | 50.174864000 |
| O | 37.081285000 | 29.901864000 | 54.566115000 |
| H | 38.024232000 | 29.738661000 | 54.328186000 |
| H | 36.612036000 | 29.639553000 | 53.716101000 |
| C | 44.930859000 | 34.247378000 | 51.496349000 |
| H | 44.649920000 | 33.515026000 | 52.258145000 |
| H | 46.009367000 | 34.419247000 | 51.504276000 |
| H | 44.409545000 | 35.193152000 | 51.676840000 |
| C | 49.850235000 | 33.747969000 | 49.207002000 |
| H | 49.269289000 | 33.912830000 | 50.122759000 |
| H | 50.908759000 | 33.701300000 | 49.487574000 |
| H | 49.711918000 | 34.627112000 | 48.565622000 |
| C | 32.345669000 | 31.384998000 | 49.167324000 |
| H | 32.998423000 | 31.303246000 | 48.291143000 |
| H | 31.541421000 | 30.645295000 | 49.065272000 |
| H | 31.905412000 | 32.387257000 | 49.147443000 |
| C | 36.569710000 | 38.022302000 | 55.269591000 |
| H | 35.549443000 | 37.712424000 | 55.012683000 |
| H | 36.493014000 | 38.907801000 | 55.911150000 |
| H | 37.069970000 | 38.321419000 | 54.342752000 |
| C | 37.395919000 | 37.108470000 | 51.657067000 |
| H | 38.470391000 | 37.148433000 | 51.846186000 |
| H | 37.032326000 | 38.126598000 | 51.472148000 |
| H | 36.894087000 | 36.740301000 | 52.554897000 |
| C | 39.582522000 | 34.418978000 | 47.496449000 |
| H | 40.655354000 | 34.224834000 | 47.573151000 |
| H | 39.403845000 | 35.052816000 | 46.619541000 |
| H | 39.286346000 | 34.970240000 | 48.390459000 |
| C | 41.338989000 | 26.450985000 | 54.389966000 |
| H | 41.547028000 | 25.911856000 | 55.316830000 |
| H | 40.331879000 | 26.194027000 | 54.049478000 |
| C | 42.637660000 | 29.961503000 | 55.106163000 |
| H | 41.737552000 | 30.436042000 | 54.717498000 |
| H | 42.834553000 | 30.329047000 | 56.120824000 |
| H | 43.486778000 | 30.235782000 | 54.484557000 |
| C | 43.813994000 | 26.437016000 | 51.433000000 |
| H | 44.461465000 | 25.630099000 | 51.797171000 |
| H | 43.234316000 | 26.029124000 | 50.596464000 |
| C | 46.133659000 | 29.475758000 | 51.183399000 |
| H | 46.670083000 | 29.213343000 | 50.269195000 |
| H | 45.423918000 | 30.283791000 | 50.973381000 |
| H | 46.850764000 | 29.812818000 | 51.937807000 |
| O | 41.091858000 | 34.035072000 | 53.105126000 |
| H | 41.810396000 | 33.333391000 | 53.222650000 |

|                                           |              |              |              |
|-------------------------------------------|--------------|--------------|--------------|
| H                                         | 41.583743000 | 34.831692000 | 52.850104000 |
| H                                         | 38.606509000 | 30.596461000 | 49.491441000 |
| O                                         | 36.091602000 | 29.424875000 | 52.117418000 |
| H                                         | 36.914491000 | 29.461752000 | 51.589619000 |
| H                                         | 35.636517000 | 30.293084000 | 51.935883000 |
| <u>dissociative TS (-4203.59129 A.U.)</u> |              |              |              |
| C                                         | 42.508449000 | 28.444057000 | 55.220047000 |
| O                                         | 43.358446000 | 27.762178000 | 55.793052000 |
| N                                         | 41.410109000 | 27.887326000 | 54.617700000 |
| H                                         | 40.786137000 | 28.485767000 | 54.073928000 |
| C                                         | 42.357293000 | 25.933425000 | 53.333585000 |
| O                                         | 42.576074000 | 24.727955000 | 53.236755000 |
| N                                         | 42.962247000 | 26.866136000 | 52.536179000 |
| H                                         | 42.645380000 | 27.835616000 | 52.532033000 |
| C                                         | 44.724367000 | 27.520069000 | 50.823840000 |
| O                                         | 44.874535000 | 27.585140000 | 49.603721000 |
| N                                         | 45.431318000 | 28.301522000 | 51.693226000 |
| H                                         | 45.010411000 | 28.406654000 | 52.609156000 |
| C                                         | 49.344012000 | 32.540831000 | 48.405837000 |
| H                                         | 49.886773000 | 32.484347000 | 47.451151000 |
| H                                         | 49.584255000 | 31.614916000 | 48.946830000 |
| C                                         | 47.835463000 | 32.586561000 | 48.122880000 |
| H                                         | 47.296377000 | 32.626054000 | 49.080846000 |
| H                                         | 47.593376000 | 33.526626000 | 47.604949000 |
| C                                         | 47.330488000 | 31.408169000 | 47.273332000 |
| H                                         | 47.896137000 | 31.385085000 | 46.330565000 |
| H                                         | 47.536792000 | 30.455844000 | 47.782203000 |
| C                                         | 45.834037000 | 31.491095000 | 46.930633000 |
| H                                         | 45.622346000 | 32.478247000 | 46.498141000 |
| H                                         | 45.578793000 | 30.750400000 | 46.165928000 |
| N                                         | 44.910696000 | 31.288799000 | 48.068180000 |
| H                                         | 45.338640000 | 31.606129000 | 48.937787000 |
| H                                         | 43.616192000 | 32.273188000 | 48.128375000 |
| H                                         | 44.708920000 | 30.299125000 | 48.222868000 |
| C                                         | 33.350736000 | 32.033454000 | 48.207113000 |
| H                                         | 33.696346000 | 31.286430000 | 47.481393000 |
| H                                         | 32.882902000 | 32.859549000 | 47.660926000 |
| C                                         | 34.561482000 | 32.560971000 | 48.991124000 |
| O                                         | 35.359996000 | 31.710897000 | 49.475353000 |
| O                                         | 34.650809000 | 33.815937000 | 49.144907000 |
| C                                         | 37.638899000 | 37.183908000 | 55.992662000 |
| H                                         | 38.550716000 | 37.788397000 | 56.084166000 |
| H                                         | 37.311374000 | 36.976804000 | 57.021852000 |
| C                                         | 37.999223000 | 35.852760000 | 55.299191000 |

|    |              |              |              |
|----|--------------|--------------|--------------|
| H  | 38.148040000 | 36.028196000 | 54.226817000 |
| H  | 38.966848000 | 35.504235000 | 55.685736000 |
| C  | 36.947390000 | 34.744675000 | 55.496425000 |
| H  | 37.004470000 | 34.354615000 | 56.523253000 |
| H  | 35.939582000 | 35.167924000 | 55.392575000 |
| C  | 37.020166000 | 33.596434000 | 54.488531000 |
| H  | 36.232093000 | 32.860072000 | 54.669128000 |
| H  | 36.894019000 | 33.962801000 | 53.468165000 |
| N  | 38.308934000 | 32.837151000 | 54.484135000 |
| H  | 38.450263000 | 32.283664000 | 55.331245000 |
| H  | 38.331750000 | 32.182571000 | 53.609398000 |
| H  | 39.153463000 | 33.419493000 | 54.316873000 |
| C  | 37.235659000 | 36.132921000 | 50.493762000 |
| H  | 36.214234000 | 36.123008000 | 50.102303000 |
| H  | 37.909155000 | 36.413529000 | 49.674449000 |
| C  | 37.638041000 | 34.755368000 | 50.963804000 |
| O  | 38.761858000 | 34.635412000 | 51.544448000 |
| N  | 36.774948000 | 33.776612000 | 50.808768000 |
| H  | 37.062127000 | 32.824242000 | 51.030403000 |
| H  | 35.923615000 | 33.867275000 | 50.186094000 |
| C  | 39.599477000 | 32.918606000 | 47.181499000 |
| H  | 38.833204000 | 32.639552000 | 46.447345000 |
| H  | 40.564069000 | 32.613074000 | 46.758656000 |
| C  | 39.381370000 | 32.101325000 | 48.432546000 |
| O  | 39.391470000 | 30.798653000 | 48.296308000 |
| O  | 39.213558000 | 32.665355000 | 49.513272000 |
| Mg | 39.979410000 | 33.030345000 | 51.356608000 |
| O  | 38.536341000 | 31.731553000 | 52.173788000 |
| P  | 39.027086000 | 30.263306000 | 51.992253000 |
| O  | 38.835195000 | 29.641918000 | 50.629679000 |
| O  | 39.526293000 | 29.542083000 | 53.201942000 |
| O  | 40.927301000 | 31.233302000 | 51.432751000 |
| P  | 42.413533000 | 31.135246000 | 51.921460000 |
| O  | 42.695827000 | 32.183127000 | 53.012244000 |
| O  | 42.985997000 | 29.762209000 | 52.052329000 |
| O  | 43.241473000 | 31.817463000 | 50.548833000 |
| P  | 42.914342000 | 33.241185000 | 49.927462000 |
| O  | 41.680108000 | 33.912758000 | 50.472221000 |
| O  | 42.924734000 | 33.020050000 | 48.368177000 |
| O  | 44.239067000 | 34.133112000 | 50.174698000 |
| O  | 36.847359000 | 29.665726000 | 52.676285000 |
| H  | 37.057732000 | 28.775390000 | 52.998226000 |
| H  | 36.367273000 | 29.514265000 | 51.801402000 |
| C  | 44.538359000 | 34.553363000 | 51.521191000 |



|   |              |              |              |
|---|--------------|--------------|--------------|
| H | 44.334970000 | 33.752734000 | 52.239181000 |
| H | 45.598871000 | 34.815568000 | 51.532286000 |
| H | 43.941324000 | 35.436692000 | 51.771641000 |
| C | 49.850235000 | 33.747969000 | 49.207002000 |
| H | 49.354045000 | 33.811741000 | 50.183127000 |
| H | 50.929831000 | 33.683581000 | 49.385568000 |
| H | 49.653993000 | 34.686888000 | 48.674612000 |
| C | 32.345668000 | 31.384998000 | 49.167324000 |
| H | 31.979166000 | 32.117739000 | 49.896940000 |
| H | 31.476857000 | 30.978172000 | 48.633835000 |
| H | 32.822403000 | 30.568572000 | 49.719461000 |
| C | 36.569710000 | 38.022303000 | 55.269591000 |
| H | 35.637134000 | 37.463893000 | 55.123699000 |
| H | 36.325044000 | 38.920448000 | 55.848520000 |
| H | 36.921536000 | 38.344053000 | 54.284331000 |
| C | 37.395919000 | 37.108467000 | 51.657066000 |
| H | 38.418888000 | 37.080353000 | 52.039512000 |
| H | 37.169110000 | 38.136018000 | 51.347596000 |
| H | 36.710203000 | 36.853213000 | 52.471843000 |
| C | 39.582522000 | 34.418981000 | 47.496449000 |
| H | 40.351139000 | 34.664729000 | 48.231527000 |
| H | 39.769341000 | 34.997778000 | 46.584232000 |
| H | 38.610544000 | 34.717463000 | 47.899052000 |
| C | 41.338990000 | 26.450982000 | 54.389967000 |
| H | 41.549279000 | 25.902491000 | 55.310687000 |
| H | 40.331979000 | 26.196797000 | 54.046716000 |
| C | 42.637661000 | 29.961504000 | 55.106164000 |
| H | 41.721333000 | 30.441416000 | 54.762510000 |
| H | 42.921415000 | 30.358978000 | 56.087201000 |
| H | 43.428442000 | 30.197195000 | 54.397488000 |
| C | 43.813993000 | 26.437017000 | 51.433000000 |
| H | 44.435031000 | 25.607724000 | 51.791734000 |
| H | 43.221651000 | 26.051340000 | 50.594960000 |
| C | 46.133660000 | 29.475759000 | 51.183399000 |
| H | 46.651624000 | 29.195766000 | 50.264262000 |
| H | 45.432621000 | 30.293596000 | 50.979751000 |
| H | 46.866344000 | 29.805134000 | 51.926831000 |
| O | 40.714849000 | 33.672215000 | 53.292264000 |
| H | 41.584629000 | 33.067311000 | 53.290182000 |
| H | 41.015071000 | 34.572749000 | 53.092074000 |
| H | 39.237119000 | 30.366400000 | 49.205984000 |
| O | 35.995314000 | 29.206863000 | 50.215793000 |
| H | 36.950830000 | 29.245713000 | 50.014135000 |
| H | 35.643815000 | 30.063861000 | 49.855401000 |

dissociative Pr (-4203.645155 A.U.)

|   |              |              |              |
|---|--------------|--------------|--------------|
| C | 42.570112000 | 28.437816000 | 55.094028000 |
| O | 43.521427000 | 27.749464000 | 55.469338000 |
| N | 41.422998000 | 27.890156000 | 54.594986000 |
| H | 40.634709000 | 28.492874000 | 54.307618000 |
| C | 42.408647000 | 25.928776000 | 53.391640000 |
| O | 42.754755000 | 24.753631000 | 53.398447000 |
| N | 42.914750000 | 26.847911000 | 52.501770000 |
| H | 42.440356000 | 27.740218000 | 52.436635000 |
| C | 44.746432000 | 27.486357000 | 50.835466000 |
| O | 45.104486000 | 27.366094000 | 49.664181000 |
| N | 45.174421000 | 28.482936000 | 51.649917000 |
| H | 44.887011000 | 28.471818000 | 52.621076000 |
| C | 48.841852000 | 32.820690000 | 48.516050000 |
| H | 49.124290000 | 32.708301000 | 47.458582000 |
| H | 48.904811000 | 31.815726000 | 48.955682000 |
| C | 47.391281000 | 33.321816000 | 48.596909000 |
| H | 47.051045000 | 33.319879000 | 49.641049000 |
| H | 47.355415000 | 34.369024000 | 48.260783000 |
| C | 46.432568000 | 32.497069000 | 47.720966000 |
| H | 46.827804000 | 32.463950000 | 46.696138000 |
| H | 46.395191000 | 31.453924000 | 48.065208000 |
| C | 45.013208000 | 33.065256000 | 47.633298000 |
| H | 45.036894000 | 34.151863000 | 47.508891000 |
| H | 44.472760000 | 32.647153000 | 46.779050000 |
| N | 44.178494000 | 32.812249000 | 48.847667000 |
| H | 44.711198000 | 32.808228000 | 49.768138000 |
| H | 43.458779000 | 33.598788000 | 48.954579000 |
| H | 43.686789000 | 31.916589000 | 48.813731000 |
| C | 33.790237000 | 30.876434000 | 49.140605000 |
| H | 33.961136000 | 30.111236000 | 49.909881000 |
| H | 34.014202000 | 30.377211000 | 48.188046000 |
| C | 34.827175000 | 31.979187000 | 49.329875000 |
| O | 36.105025000 | 31.611294000 | 49.343849000 |
| O | 34.524298000 | 33.159186000 | 49.443525000 |
| C | 37.860063000 | 37.599804000 | 55.991864000 |
| H | 38.622754000 | 38.371086000 | 55.817565000 |
| H | 37.687495000 | 37.588732000 | 57.078396000 |
| C | 38.416543000 | 36.231140000 | 55.550736000 |
| H | 38.379779000 | 36.154635000 | 54.456940000 |
| H | 39.477608000 | 36.167160000 | 55.822761000 |
| C | 37.677417000 | 35.030061000 | 56.164737000 |
| H | 37.933182000 | 34.951948000 | 57.233161000 |
| H | 36.592077000 | 35.202173000 | 56.129272000 |

|    |              |              |              |
|----|--------------|--------------|--------------|
| C  | 37.940349000 | 33.691392000 | 55.463236000 |
| H  | 37.316223000 | 32.914907000 | 55.937074000 |
| H  | 37.630793000 | 33.766488000 | 54.418071000 |
| N  | 39.361811000 | 33.302162000 | 55.440602000 |
| H  | 39.670940000 | 32.999387000 | 56.363751000 |
| H  | 39.481872000 | 32.512904000 | 54.792467000 |
| H  | 40.492960000 | 34.142978000 | 54.511327000 |
| C  | 37.471471000 | 35.863453000 | 50.765235000 |
| H  | 36.566343000 | 35.760419000 | 50.156434000 |
| H  | 38.331220000 | 35.949505000 | 50.091450000 |
| C  | 37.714532000 | 34.610697000 | 51.585259000 |
| O  | 38.705489000 | 34.549221000 | 52.347976000 |
| N  | 36.825913000 | 33.620652000 | 51.489328000 |
| H  | 37.049405000 | 32.721302000 | 51.924781000 |
| H  | 36.114196000 | 33.627723000 | 50.761118000 |
| C  | 39.436334000 | 32.903101000 | 47.633700000 |
| H  | 38.427716000 | 32.572851000 | 47.348397000 |
| H  | 40.121112000 | 32.367616000 | 46.964301000 |
| C  | 39.666232000 | 32.368052000 | 49.036362000 |
| O  | 39.776667000 | 31.072793000 | 49.091412000 |
| O  | 39.715533000 | 33.123750000 | 50.016133000 |
| Mg | 40.529363000 | 33.475630000 | 51.911420000 |
| O  | 39.846754000 | 31.851885000 | 52.891226000 |
| P  | 39.123139000 | 30.506788000 | 52.672973000 |
| O  | 39.277230000 | 29.953737000 | 51.234712000 |
| O  | 39.268406000 | 29.521277000 | 53.812538000 |
| O  | 42.446673000 | 32.801737000 | 51.513540000 |
| P  | 43.766198000 | 33.413529000 | 51.975653000 |
| O  | 43.829713000 | 33.536964000 | 53.574646000 |
| O  | 45.041414000 | 32.810159000 | 51.430977000 |
| O  | 43.728305000 | 35.006750000 | 51.485235000 |
| P  | 42.525029000 | 35.569734000 | 50.503799000 |
| O  | 41.205519000 | 35.406805000 | 51.243373000 |
| O  | 42.700892000 | 35.019090000 | 49.105678000 |
| O  | 42.928854000 | 37.141722000 | 50.436770000 |
| O  | 37.442960000 | 30.919611000 | 52.717276000 |
| H  | 37.160017000 | 30.719895000 | 53.624362000 |
| H  | 36.598920000 | 29.789540000 | 51.400251000 |
| C  | 42.800874000 | 37.939835000 | 51.612254000 |
| H  | 43.468120000 | 37.578901000 | 52.403828000 |
| H  | 43.089074000 | 38.957418000 | 51.334148000 |
| H  | 41.767127000 | 37.939693000 | 51.975233000 |
| C  | 49.850235000 | 33.747969000 | 49.207002000 |
| H  | 49.613733000 | 33.867511000 | 50.270904000 |

|   |              |              |              |
|---|--------------|--------------|--------------|
| H | 50.869688000 | 33.351882000 | 49.132453000 |
| H | 49.843698000 | 34.746464000 | 48.752504000 |
| C | 32.345668000 | 31.384998000 | 49.167324000 |
| H | 32.180695000 | 32.129363000 | 48.382893000 |
| H | 31.644813000 | 30.556512000 | 49.016795000 |
| H | 32.116888000 | 31.863694000 | 50.124349000 |
| C | 36.569710000 | 38.022303000 | 55.269591000 |
| H | 35.784384000 | 37.262026000 | 55.360587000 |
| H | 36.171986000 | 38.956151000 | 55.685726000 |
| H | 36.753617000 | 38.183923000 | 54.203763000 |
| C | 37.395919000 | 37.108468000 | 51.657066000 |
| H | 38.306224000 | 37.199323000 | 52.254610000 |
| H | 37.290657000 | 38.012961000 | 51.047400000 |
| H | 36.535626000 | 37.054981000 | 52.332338000 |
| C | 39.582522000 | 34.418981000 | 47.496449000 |
| H | 40.566123000 | 34.755354000 | 47.837117000 |
| H | 39.447550000 | 34.716445000 | 46.449498000 |
| H | 38.827090000 | 34.936914000 | 48.093686000 |
| C | 41.338991000 | 26.450981000 | 54.389966000 |
| H | 41.496658000 | 25.891103000 | 55.316250000 |
| H | 40.344830000 | 26.218968000 | 53.996424000 |
| C | 42.637660000 | 29.961506000 | 55.106165000 |
| H | 41.720356000 | 30.433439000 | 54.743730000 |
| H | 42.857329000 | 30.300857000 | 56.124116000 |
| H | 43.470511000 | 30.288180000 | 54.474575000 |
| C | 43.813991000 | 26.437015000 | 51.433000000 |
| H | 44.421193000 | 25.616736000 | 51.832681000 |
| H | 43.264022000 | 26.022128000 | 50.578627000 |
| C | 46.133660000 | 29.475760000 | 51.183399000 |
| H | 47.125466000 | 29.305576000 | 51.623491000 |
| H | 46.209773000 | 29.359776000 | 50.101183000 |
| H | 45.798882000 | 30.488218000 | 51.432247000 |
| O | 41.200535000 | 34.368538000 | 53.810898000 |
| H | 42.933733000 | 33.818391000 | 53.888277000 |
| H | 41.056658000 | 35.279307000 | 53.501602000 |
| H | 39.676205000 | 30.684420000 | 50.084805000 |
| O | 36.698011000 | 29.382698000 | 50.512002000 |
| H | 37.690473000 | 29.359954000 | 50.504925000 |
| H | 36.285128000 | 30.649203000 | 49.640948000 |

#### 4. Double Mg<sup>2+</sup> model for AceK

associative Re (-4556.515315 A.U.)

|   |              |              |              |
|---|--------------|--------------|--------------|
| C | 42.522701000 | 28.443875000 | 55.209963000 |
|---|--------------|--------------|--------------|

|   |              |              |              |
|---|--------------|--------------|--------------|
| O | 43.384577000 | 27.765562000 | 55.753946000 |
| N | 41.423278000 | 27.885795000 | 54.603907000 |
| H | 40.719770000 | 28.493039000 | 54.193373000 |
| C | 42.258618000 | 25.892297000 | 53.268024000 |
| O | 42.315832000 | 24.684287000 | 53.076233000 |
| N | 42.958674000 | 26.818451000 | 52.547450000 |
| H | 42.722587000 | 27.796111000 | 52.668307000 |
| C | 45.111751000 | 27.259028000 | 51.270150000 |
| O | 46.213329000 | 26.734611000 | 51.295694000 |
| N | 44.963978000 | 28.615026000 | 51.001801000 |
| H | 44.086287000 | 29.029603000 | 51.314707000 |
| C | 49.405773000 | 32.436968000 | 48.546707000 |
| H | 49.941249000 | 32.305998000 | 47.596652000 |
| H | 49.694130000 | 31.587504000 | 49.180434000 |
| C | 47.894207000 | 32.378042000 | 48.276467000 |
| H | 47.366241000 | 32.501373000 | 49.236122000 |
| H | 47.602445000 | 33.236774000 | 47.654662000 |
| C | 47.455415000 | 31.079596000 | 47.577936000 |
| H | 48.030331000 | 30.957875000 | 46.651431000 |
| H | 47.695433000 | 30.206078000 | 48.199117000 |
| C | 45.979187000 | 31.046124000 | 47.180067000 |
| H | 45.703727000 | 31.941067000 | 46.615322000 |
| H | 45.738117000 | 30.170534000 | 46.573082000 |
| N | 45.052646000 | 31.011192000 | 48.370634000 |
| H | 45.388785000 | 31.618091000 | 49.126796000 |
| H | 44.096379000 | 31.421037000 | 48.151467000 |
| H | 44.947342000 | 30.071892000 | 48.780090000 |
| C | 32.649429000 | 31.321793000 | 50.670462000 |
| H | 32.754166000 | 32.320776000 | 51.104665000 |
| H | 31.825187000 | 30.817226000 | 51.189718000 |
| C | 33.913772000 | 30.529751000 | 50.913905000 |
| O | 34.913503000 | 31.048716000 | 51.517764000 |
| O | 33.987182000 | 29.338666000 | 50.467969000 |
| C | 37.597177000 | 37.316697000 | 56.167141000 |
| H | 38.498575000 | 37.937970000 | 56.231542000 |
| H | 37.210883000 | 37.239261000 | 57.192134000 |
| C | 37.986641000 | 35.911126000 | 55.668202000 |
| H | 38.139979000 | 35.957640000 | 54.579441000 |
| H | 38.955135000 | 35.626294000 | 56.099353000 |
| C | 36.939881000 | 34.826766000 | 56.006894000 |
| H | 37.129263000 | 34.427843000 | 57.011261000 |
| H | 35.937465000 | 35.271057000 | 56.042071000 |
| C | 36.862195000 | 33.686320000 | 54.991896000 |
| H | 36.169761000 | 32.904473000 | 55.315780000 |

|    |              |              |              |
|----|--------------|--------------|--------------|
| H  | 36.516165000 | 34.057817000 | 54.023762000 |
| N  | 38.181943000 | 33.023929000 | 54.744956000 |
| H  | 38.506161000 | 32.391885000 | 55.526221000 |
| H  | 38.164955000 | 32.431609000 | 53.879051000 |
| H  | 38.926705000 | 33.709107000 | 54.556913000 |
| C  | 36.627384000 | 36.011017000 | 50.905849000 |
| H  | 35.569834000 | 35.997522000 | 51.192254000 |
| H  | 36.661265000 | 36.206632000 | 49.825706000 |
| C  | 37.254153000 | 34.653202000 | 51.141433000 |
| O  | 38.504704000 | 34.561136000 | 51.176153000 |
| N  | 36.465289000 | 33.593647000 | 51.335776000 |
| H  | 36.880429000 | 32.677694000 | 51.520460000 |
| H  | 35.457853000 | 33.632057000 | 51.271133000 |
| C  | 38.890152000 | 33.062903000 | 47.229550000 |
| H  | 37.802036000 | 33.178308000 | 47.285396000 |
| H  | 39.153975000 | 32.674409000 | 46.243477000 |
| C  | 39.309255000 | 32.084365000 | 48.284709000 |
| O  | 40.081620000 | 31.098960000 | 47.864806000 |
| O  | 38.985588000 | 32.193743000 | 49.477223000 |
| Mg | 39.807220000 | 33.022971000 | 51.372545000 |
| O  | 38.464308000 | 31.711670000 | 52.262878000 |
| P  | 38.810389000 | 30.189342000 | 52.471137000 |
| O  | 37.733256000 | 29.270309000 | 51.891353000 |
| O  | 39.248378000 | 29.852314000 | 53.876922000 |
| O  | 40.101632000 | 29.909074000 | 51.419256000 |
| P  | 41.549667000 | 30.608401000 | 51.638214000 |
| O  | 41.303925000 | 31.917574000 | 52.383456000 |
| O  | 42.599869000 | 29.656300000 | 52.079490000 |
| O  | 41.869231000 | 31.075732000 | 50.067635000 |
| P  | 42.431906000 | 32.608190000 | 49.696258000 |
| O  | 41.405398000 | 33.614329000 | 50.193631000 |
| O  | 42.808247000 | 32.508842000 | 48.244827000 |
| O  | 43.829152000 | 32.710472000 | 50.531158000 |
| O  | 39.360725000 | 31.136001000 | 56.238525000 |
| H  | 39.379224000 | 30.524317000 | 55.459024000 |
| H  | 39.219401000 | 30.586782000 | 57.023058000 |
| C  | 44.000990000 | 33.526183000 | 51.706719000 |
| H  | 43.598629000 | 33.009964000 | 52.580162000 |
| H  | 45.076113000 | 33.673587000 | 51.822913000 |
| H  | 43.511140000 | 34.493792000 | 51.572663000 |
| C  | 49.850245000 | 33.747972000 | 49.207006000 |
| H  | 49.361265000 | 33.892538000 | 50.178209000 |
| H  | 50.931578000 | 33.752533000 | 49.377018000 |
| H  | 49.607593000 | 34.612658000 | 48.577890000 |

|    |              |              |              |
|----|--------------|--------------|--------------|
| C  | 32.345670000 | 31.385019000 | 49.167293000 |
| H  | 32.229747000 | 30.377562000 | 48.760359000 |
| H  | 31.422112000 | 31.942654000 | 48.981543000 |
| H  | 33.155414000 | 31.881599000 | 48.620333000 |
| C  | 36.569708000 | 38.022328000 | 55.269590000 |
| H  | 35.688063000 | 37.396877000 | 55.080050000 |
| H  | 36.214420000 | 38.946830000 | 55.736886000 |
| H  | 37.007195000 | 38.292425000 | 54.304165000 |
| C  | 37.395943000 | 37.108497000 | 51.657044000 |
| H  | 38.431811000 | 37.154405000 | 51.313630000 |
| H  | 36.928487000 | 38.082542000 | 51.484677000 |
| H  | 37.395789000 | 36.918409000 | 52.731528000 |
| C  | 39.582551000 | 34.418942000 | 47.496451000 |
| H  | 40.669244000 | 34.313031000 | 47.460737000 |
| H  | 39.275523000 | 35.134783000 | 46.727778000 |
| H  | 39.307035000 | 34.812727000 | 48.477154000 |
| C  | 41.339009000 | 26.451011000 | 54.389993000 |
| H  | 41.622968000 | 25.919435000 | 55.301909000 |
| H  | 40.308453000 | 26.181358000 | 54.142540000 |
| C  | 42.637667000 | 29.961492000 | 55.106186000 |
| H  | 41.698342000 | 30.456559000 | 54.856117000 |
| H  | 43.012139000 | 30.343684000 | 56.060586000 |
| H  | 43.371454000 | 30.193229000 | 54.331591000 |
| C  | 43.814003000 | 26.436992000 | 51.433005000 |
| H  | 44.111707000 | 25.399676000 | 51.585986000 |
| H  | 43.260376000 | 26.488468000 | 50.480182000 |
| C  | 46.133662000 | 29.475747000 | 51.183405000 |
| H  | 46.856713000 | 29.337487000 | 50.371358000 |
| H  | 45.795853000 | 30.516442000 | 51.211201000 |
| H  | 46.663338000 | 29.254657000 | 52.117725000 |
| O  | 40.407462000 | 34.150531000 | 53.235095000 |
| H  | 41.120991000 | 33.487455000 | 53.362924000 |
| H  | 40.832470000 | 35.001486000 | 53.042742000 |
| H  | 40.508443000 | 30.676837000 | 48.648241000 |
| Mg | 35.979684000 | 29.286497000 | 51.013616000 |
| O  | 35.589510000 | 27.925362000 | 52.630575000 |
| H  | 34.816188000 | 27.990130000 | 53.211335000 |
| H  | 36.387218000 | 28.073731000 | 53.170943000 |
| O  | 36.122819000 | 27.560204000 | 49.743898000 |
| H  | 36.379892000 | 26.749150000 | 50.212943000 |
| H  | 35.198668000 | 27.427491000 | 49.467024000 |
| O  | 36.812547000 | 30.235398000 | 49.291910000 |
| H  | 37.272090000 | 29.523319000 | 48.815916000 |
| H  | 37.510533000 | 30.864602000 | 49.563537000 |

associative TS (-4556.461466 A.U.)

|   |              |              |              |
|---|--------------|--------------|--------------|
| C | 42.483486000 | 28.450788000 | 55.279039000 |
| O | 43.271682000 | 27.787783000 | 55.938847000 |
| N | 41.423085000 | 27.883837000 | 54.608182000 |
| H | 40.846855000 | 28.494234000 | 54.044858000 |
| C | 42.231942000 | 25.892530000 | 53.245412000 |
| O | 42.236399000 | 24.690205000 | 53.011117000 |
| N | 42.980892000 | 26.812550000 | 52.568138000 |
| H | 42.742470000 | 27.791558000 | 52.681968000 |
| C | 45.095914000 | 27.273405000 | 51.252641000 |
| O | 46.198362000 | 26.749173000 | 51.202114000 |
| N | 44.941522000 | 28.636821000 | 51.057658000 |
| H | 44.066254000 | 29.055700000 | 51.376420000 |
| C | 49.413969000 | 32.438872000 | 48.536000000 |
| H | 49.946410000 | 32.323617000 | 47.582129000 |
| H | 49.715680000 | 31.586309000 | 49.159345000 |
| C | 47.901617000 | 32.361533000 | 48.270096000 |
| H | 47.372494000 | 32.456712000 | 49.232025000 |
| H | 47.594675000 | 33.226504000 | 47.664353000 |
| C | 47.485003000 | 31.068443000 | 47.547088000 |
| H | 48.068010000 | 30.972602000 | 46.622546000 |
| H | 47.737079000 | 30.188496000 | 48.154651000 |
| C | 46.011721000 | 31.012875000 | 47.138173000 |
| H | 45.719101000 | 31.916682000 | 46.596312000 |
| H | 45.798765000 | 30.150901000 | 46.501613000 |
| N | 45.075506000 | 30.917641000 | 48.314239000 |
| H | 45.357228000 | 31.539703000 | 49.079919000 |
| H | 44.089792000 | 31.266521000 | 48.091531000 |
| H | 45.021074000 | 29.973735000 | 48.719739000 |
| C | 32.552693000 | 31.483335000 | 50.686311000 |
| H | 32.626832000 | 32.524466000 | 51.014115000 |
| H | 31.701648000 | 31.023479000 | 51.202410000 |
| C | 33.807998000 | 30.739140000 | 51.076196000 |
| O | 34.816413000 | 31.354423000 | 51.562109000 |
| O | 33.870674000 | 29.483178000 | 50.857816000 |
| C | 36.665488000 | 37.352301000 | 56.648330000 |
| H | 37.368231000 | 37.926841000 | 57.264681000 |
| H | 35.694239000 | 37.423501000 | 57.156668000 |
| C | 37.122225000 | 35.877477000 | 56.672067000 |
| H | 38.090715000 | 35.795752000 | 56.152222000 |
| H | 37.329242000 | 35.614578000 | 57.715681000 |
| C | 36.112395000 | 34.845648000 | 56.103880000 |
| H | 36.093746000 | 33.946748000 | 56.734094000 |
| H | 35.098374000 | 35.261104000 | 56.153861000 |



|    |             |             |             |
|----|-------------|-------------|-------------|
| C  | 36.35776000 | 34.41098200 | 54.65648600 |
| H  | 35.50883300 | 33.84705200 | 54.26011200 |
| H  | 36.51453600 | 35.28002800 | 54.01443600 |
| N  | 37.55533400 | 33.51535300 | 54.52584000 |
| H  | 37.33760500 | 32.40066600 | 54.54917000 |
| H  | 38.00483700 | 33.58461200 | 53.60606900 |
| H  | 38.27671200 | 33.75314300 | 55.21038000 |
| C  | 36.71338800 | 36.09574200 | 50.72832800 |
| H  | 35.62901000 | 36.07522100 | 50.88153700 |
| H  | 36.89101000 | 36.37408400 | 49.68221600 |
| C  | 37.31804700 | 34.73252000 | 50.96177900 |
| O  | 38.56797600 | 34.63279500 | 50.99959400 |
| N  | 36.51782800 | 33.69103500 | 51.19121600 |
| H  | 36.93525800 | 32.79086200 | 51.43032400 |
| H  | 35.51022300 | 33.72810400 | 51.13028500 |
| C  | 38.82163200 | 33.10341000 | 47.20911800 |
| H  | 37.74089100 | 33.27687500 | 47.25963900 |
| H  | 39.07093500 | 32.71499400 | 46.21916500 |
| C  | 39.17928600 | 32.08761700 | 48.25341900 |
| O  | 39.90906100 | 31.07258300 | 47.82544000 |
| O  | 38.85180600 | 32.19495500 | 49.44442100 |
| Mg | 39.86778100 | 33.09880600 | 51.30287700 |
| O  | 38.48488300 | 31.96462300 | 52.26854600 |
| P  | 38.58001200 | 30.49904800 | 52.76791100 |
| O  | 37.60051400 | 29.42767200 | 52.27182200 |
| O  | 39.52447200 | 30.11720200 | 54.03787700 |
| O  | 39.89192000 | 29.97858300 | 51.67195500 |
| P  | 41.37446000 | 30.57730300 | 51.69787100 |
| O  | 41.31853400 | 31.95885200 | 52.35757800 |
| O  | 42.42501000 | 29.59032300 | 52.07975700 |
| O  | 41.63295900 | 30.95734100 | 50.06975000 |
| P  | 42.35194800 | 32.38877400 | 49.62132600 |
| O  | 41.42159200 | 33.51983900 | 50.04283000 |
| O  | 42.73409800 | 32.19761600 | 48.17811400 |
| O  | 43.75891100 | 32.44081400 | 50.45080600 |
| O  | 37.33268600 | 30.98138700 | 54.28268800 |
| H  | 38.93527500 | 30.19656500 | 54.81593500 |
| H  | 36.46177800 | 30.58318800 | 54.12546600 |
| C  | 43.99401200 | 33.31538000 | 51.57304300 |
| H  | 43.57596100 | 32.87422400 | 52.47832300 |
| H  | 45.07784500 | 33.41180200 | 51.66424800 |
| H  | 43.55329000 | 34.29777200 | 51.38668900 |
| C  | 49.85024500 | 33.74797200 | 49.20700600 |
| H  | 49.36556200 | 33.87882000 | 50.18227900 |

|    |              |              |              |
|----|--------------|--------------|--------------|
| H  | 50.932493000 | 33.760120000 | 49.370729000 |
| H  | 49.596261000 | 34.616436000 | 48.587632000 |
| C  | 32.345670000 | 31.385019000 | 49.167294000 |
| H  | 32.257179000 | 30.339243000 | 48.862434000 |
| H  | 31.435034000 | 31.912786000 | 48.866480000 |
| H  | 33.188439000 | 31.828388000 | 48.624886000 |
| C  | 36.569708000 | 38.022328000 | 55.269590000 |
| H  | 35.823906000 | 37.538916000 | 54.626338000 |
| H  | 36.274452000 | 39.071743000 | 55.372031000 |
| H  | 37.535511000 | 37.999992000 | 54.750470000 |
| C  | 37.395943000 | 37.108497000 | 51.657044000 |
| H  | 38.467602000 | 37.149649000 | 51.451451000 |
| H  | 36.975609000 | 38.107898000 | 51.508239000 |
| H  | 37.257447000 | 36.844835000 | 52.708565000 |
| C  | 39.582551000 | 34.418941000 | 47.496451000 |
| H  | 40.662160000 | 34.256505000 | 47.469134000 |
| H  | 39.319844000 | 35.156495000 | 46.731504000 |
| H  | 39.321287000 | 34.817675000 | 48.478285000 |
| C  | 41.339007000 | 26.451018000 | 54.389993000 |
| H  | 41.651817000 | 25.933750000 | 55.300209000 |
| H  | 40.304604000 | 26.166564000 | 54.175598000 |
| C  | 42.637666000 | 29.961490000 | 55.106187000 |
| H  | 41.716662000 | 30.466389000 | 54.816791000 |
| H  | 43.017625000 | 30.372404000 | 56.046135000 |
| H  | 43.382361000 | 30.140730000 | 54.326856000 |
| C  | 43.814009000 | 26.436987000 | 51.433002000 |
| H  | 44.125861000 | 25.402354000 | 51.573885000 |
| H  | 43.240020000 | 26.486521000 | 50.492270000 |
| C  | 46.133658000 | 29.475747000 | 51.183406000 |
| H  | 46.831008000 | 29.289828000 | 50.359061000 |
| H  | 45.819555000 | 30.523616000 | 51.183443000 |
| H  | 46.681951000 | 29.273154000 | 52.111313000 |
| O  | 40.383596000 | 34.218155000 | 53.147339000 |
| H  | 41.022623000 | 33.497083000 | 53.342440000 |
| H  | 40.906918000 | 35.018877000 | 52.984456000 |
| H  | 40.321773000 | 30.633983000 | 48.608744000 |
| Mg | 35.856276000 | 29.512074000 | 51.367080000 |
| O  | 35.114898000 | 28.755307000 | 53.263313000 |
| H  | 34.201771000 | 28.426122000 | 53.247624000 |
| H  | 35.644922000 | 28.152141000 | 53.807039000 |
| O  | 36.541554000 | 27.641035000 | 50.563793000 |
| H  | 37.355223000 | 27.469355000 | 51.071397000 |
| H  | 36.079056000 | 26.798984000 | 50.434618000 |
| O  | 36.711824000 | 30.240153000 | 49.558355000 |

|                                           |              |              |              |
|-------------------------------------------|--------------|--------------|--------------|
| H                                         | 37.146418000 | 29.473873000 | 49.148876000 |
| H                                         | 37.419893000 | 30.905681000 | 49.689199000 |
| <u>associative Pr (-4556.538818 A.U.)</u> |              |              |              |
| C                                         | 42.260164000 | 28.505283000 | 55.418771000 |
| O                                         | 42.723054000 | 27.923268000 | 56.386988000 |
| N                                         | 41.397073000 | 27.909748000 | 54.519614000 |
| H                                         | 41.215666000 | 28.446147000 | 53.675269000 |
| C                                         | 42.274678000 | 25.874119000 | 53.293704000 |
| O                                         | 42.362138000 | 24.663912000 | 53.142369000 |
| N                                         | 42.961865000 | 26.799685000 | 52.555528000 |
| H                                         | 42.664740000 | 27.764513000 | 52.599449000 |
| C                                         | 45.120635000 | 27.238676000 | 51.352524000 |
| O                                         | 46.207210000 | 26.683551000 | 51.271009000 |
| N                                         | 44.979090000 | 28.604573000 | 51.329668000 |
| H                                         | 44.046897000 | 29.004525000 | 51.318149000 |
| C                                         | 48.802142000 | 34.760778000 | 48.732737000 |
| H                                         | 49.118831000 | 35.774478000 | 49.014113000 |
| H                                         | 48.751511000 | 34.750785000 | 47.635163000 |
| C                                         | 47.396652000 | 34.506213000 | 49.301565000 |
| H                                         | 47.077381000 | 33.492755000 | 49.010892000 |
| H                                         | 47.439184000 | 34.513744000 | 50.400307000 |
| C                                         | 46.375947000 | 35.552514000 | 48.825264000 |
| H                                         | 46.734116000 | 36.553305000 | 49.098321000 |
| H                                         | 46.316283000 | 35.548317000 | 47.726730000 |
| C                                         | 44.969953000 | 35.419866000 | 49.408717000 |
| H                                         | 44.974321000 | 35.398157000 | 50.501532000 |
| H                                         | 44.325942000 | 36.243395000 | 49.089681000 |
| N                                         | 44.267543000 | 34.158401000 | 48.984620000 |
| H                                         | 44.732879000 | 33.333500000 | 49.371587000 |
| H                                         | 43.233886000 | 34.137814000 | 49.367396000 |
| H                                         | 44.253736000 | 34.061948000 | 47.965457000 |
| C                                         | 32.601111000 | 31.138309000 | 50.659257000 |
| H                                         | 32.553628000 | 32.067051000 | 51.237733000 |
| H                                         | 31.808852000 | 30.491243000 | 51.062464000 |
| C                                         | 33.917563000 | 30.446647000 | 50.983616000 |
| O                                         | 34.552180000 | 30.776727000 | 52.039905000 |
| O                                         | 34.362678000 | 29.517132000 | 50.234255000 |
| C                                         | 36.905775000 | 37.916031000 | 56.763384000 |
| H                                         | 37.782484000 | 38.541229000 | 56.972420000 |
| H                                         | 36.083313000 | 38.343504000 | 57.352584000 |
| C                                         | 37.206072000 | 36.500192000 | 57.289937000 |
| H                                         | 38.093747000 | 36.103198000 | 56.771678000 |
| H                                         | 37.501535000 | 36.587364000 | 58.341710000 |
| C                                         | 36.034524000 | 35.496942000 | 57.203547000 |

|    |              |              |              |
|----|--------------|--------------|--------------|
| H  | 36.089654000 | 34.776204000 | 58.031244000 |
| H  | 35.085584000 | 36.029532000 | 57.343310000 |
| C  | 35.926713000 | 34.714174000 | 55.893551000 |
| H  | 34.990038000 | 34.153846000 | 55.835084000 |
| H  | 36.001362000 | 35.361519000 | 55.020317000 |
| N  | 37.023080000 | 33.697381000 | 55.748914000 |
| H  | 36.968096000 | 32.978760000 | 56.479563000 |
| H  | 36.981926000 | 33.160619000 | 54.843367000 |
| H  | 37.968270000 | 34.102643000 | 55.762113000 |
| C  | 36.210433000 | 36.161959000 | 51.838630000 |
| H  | 35.544955000 | 36.538773000 | 52.628745000 |
| H  | 35.597695000 | 36.117253000 | 50.929796000 |
| C  | 36.626032000 | 34.753176000 | 52.231877000 |
| O  | 37.729689000 | 34.552702000 | 52.793522000 |
| N  | 35.744864000 | 33.772628000 | 52.006014000 |
| H  | 35.931925000 | 32.809381000 | 52.285487000 |
| H  | 34.875932000 | 33.954639000 | 51.524597000 |
| C  | 38.450338000 | 34.085253000 | 48.475316000 |
| H  | 38.208459000 | 34.938216000 | 49.114154000 |
| H  | 37.542174000 | 33.811799000 | 47.920772000 |
| C  | 38.807508000 | 32.924624000 | 49.368179000 |
| O  | 39.251585000 | 31.880440000 | 48.712404000 |
| O  | 38.673982000 | 32.962802000 | 50.598331000 |
| Mg | 38.997441000 | 32.884044000 | 52.653890000 |
| O  | 37.325139000 | 31.959182000 | 53.643443000 |
| P  | 37.355389000 | 30.587759000 | 54.345193000 |
| O  | 36.833821000 | 29.397445000 | 53.569446000 |
| O  | 38.828039000 | 30.328595000 | 54.930292000 |
| O  | 39.698864000 | 29.977140000 | 50.424208000 |
| P  | 40.699687000 | 30.432624000 | 51.526392000 |
| O  | 39.915708000 | 31.059213000 | 52.724113000 |
| O  | 41.756879000 | 29.442202000 | 51.931688000 |
| O  | 41.488497000 | 31.739313000 | 50.817688000 |
| P  | 41.814823000 | 33.266227000 | 51.251963000 |
| O  | 40.894965000 | 33.698712000 | 52.391626000 |
| O  | 41.871300000 | 34.112764000 | 49.996515000 |
| O  | 43.367193000 | 33.217944000 | 51.742055000 |
| O  | 36.493990000 | 30.815499000 | 55.709121000 |
| H  | 39.449834000 | 30.341648000 | 54.139357000 |
| H  | 36.168479000 | 29.973632000 | 56.071260000 |
| C  | 43.763627000 | 32.412664000 | 52.864617000 |
| H  | 43.522738000 | 31.361993000 | 52.686342000 |
| H  | 44.843104000 | 32.534903000 | 52.972311000 |
| H  | 43.271793000 | 32.758514000 | 53.779103000 |

|    |              |              |              |
|----|--------------|--------------|--------------|
| C  | 49.850245000 | 33.747972000 | 49.207006000 |
| H  | 49.584761000 | 32.726935000 | 48.907750000 |
| H  | 50.832207000 | 33.974071000 | 48.779496000 |
| H  | 49.951331000 | 33.760660000 | 50.298676000 |
| C  | 32.345670000 | 31.385019000 | 49.167293000 |
| H  | 32.401820000 | 30.447897000 | 48.607123000 |
| H  | 31.353930000 | 31.822154000 | 49.015294000 |
| H  | 33.086199000 | 32.072775000 | 48.742314000 |
| C  | 36.569708000 | 38.022328000 | 55.269590000 |
| H  | 35.604462000 | 37.559494000 | 55.029415000 |
| H  | 36.501556000 | 39.071878000 | 54.964945000 |
| H  | 37.343854000 | 37.549476000 | 54.654071000 |
| C  | 37.395943000 | 37.108497000 | 51.657044000 |
| H  | 38.031378000 | 36.790560000 | 50.824242000 |
| H  | 37.040601000 | 38.121675000 | 51.447089000 |
| H  | 38.021296000 | 37.135600000 | 52.551263000 |
| C  | 39.582551000 | 34.418941000 | 47.496451000 |
| H  | 39.781484000 | 33.573709000 | 46.832779000 |
| H  | 39.304192000 | 35.281303000 | 46.881839000 |
| H  | 40.496355000 | 34.655590000 | 48.046589000 |
| C  | 41.339009000 | 26.451012000 | 54.389994000 |
| H  | 41.640773000 | 26.019070000 | 55.345728000 |
| H  | 40.317814000 | 26.119411000 | 54.174255000 |
| C  | 42.637666000 | 29.961491000 | 55.106186000 |
| H  | 41.944330000 | 30.452336000 | 54.421083000 |
| H  | 42.710840000 | 30.509989000 | 56.049080000 |
| H  | 43.631221000 | 29.952328000 | 54.644621000 |
| C  | 43.814004000 | 26.436993000 | 51.433005000 |
| H  | 44.081179000 | 25.386151000 | 51.540656000 |
| H  | 43.272137000 | 26.555138000 | 50.481017000 |
| C  | 46.133662000 | 29.475746000 | 51.183405000 |
| H  | 46.133613000 | 29.990922000 | 50.212344000 |
| H  | 46.169629000 | 30.226533000 | 51.982622000 |
| H  | 47.022048000 | 28.845706000 | 51.244258000 |
| O  | 39.703157000 | 33.265558000 | 54.746501000 |
| H  | 39.864109000 | 32.358229000 | 55.069075000 |
| H  | 40.553951000 | 33.576604000 | 54.372289000 |
| H  | 39.538445000 | 31.130806000 | 49.342150000 |
| Mg | 36.024673000 | 29.303391000 | 51.722132000 |
| O  | 34.995672000 | 27.459040000 | 51.827778000 |
| H  | 34.359077000 | 27.647640000 | 51.109431000 |
| H  | 35.515634000 | 26.689788000 | 51.541989000 |
| O  | 37.783290000 | 27.990801000 | 51.352686000 |
| H  | 38.548673000 | 28.444467000 | 50.926155000 |

|                                            |              |              |              |
|--------------------------------------------|--------------|--------------|--------------|
| H                                          | 38.099673000 | 27.762404000 | 52.242924000 |
| O                                          | 37.053071000 | 30.502512000 | 50.397741000 |
| H                                          | 36.752566000 | 30.385637000 | 49.482867000 |
| H                                          | 38.043045000 | 30.388547000 | 50.412306000 |
| <u>dissociative Re (-4556.534621 A.U.)</u> |              |              |              |
| C                                          | 42.637875000 | 28.452297000 | 54.967122000 |
| O                                          | 43.653764000 | 27.782016000 | 55.133995000 |
| N                                          | 41.439942000 | 27.883812000 | 54.626440000 |
| H                                          | 40.643898000 | 28.486636000 | 54.450693000 |
| C                                          | 42.288951000 | 25.918909000 | 53.277982000 |
| O                                          | 42.553298000 | 24.724888000 | 53.223394000 |
| N                                          | 42.765735000 | 26.826213000 | 52.373053000 |
| H                                          | 42.589447000 | 27.819404000 | 52.494478000 |
| C                                          | 44.571654000 | 27.639359000 | 50.826760000 |
| O                                          | 44.456227000 | 27.952875000 | 49.629731000 |
| N                                          | 45.438570000 | 28.279640000 | 51.644582000 |
| H                                          | 45.335431000 | 28.135776000 | 52.643499000 |
| C                                          | 49.453975000 | 32.342578000 | 48.717328000 |
| H                                          | 50.079394000 | 32.077582000 | 47.853710000 |
| H                                          | 49.690685000 | 31.606027000 | 49.497746000 |
| C                                          | 47.973387000 | 32.186395000 | 48.312593000 |
| H                                          | 47.333647000 | 32.399433000 | 49.183231000 |
| H                                          | 47.719837000 | 32.943717000 | 47.557110000 |
| C                                          | 47.667104000 | 30.786363000 | 47.738876000 |
| H                                          | 48.349793000 | 30.598694000 | 46.900261000 |
| H                                          | 47.893182000 | 30.008795000 | 48.481021000 |
| C                                          | 46.251963000 | 30.578960000 | 47.181063000 |
| H                                          | 45.969658000 | 31.412406000 | 46.531830000 |
| H                                          | 46.190617000 | 29.657297000 | 46.597972000 |
| N                                          | 45.176498000 | 30.487277000 | 48.236092000 |
| H                                          | 45.358598000 | 31.136128000 | 49.012232000 |
| H                                          | 44.254503000 | 30.836547000 | 47.884369000 |
| H                                          | 45.040309000 | 29.537704000 | 48.656551000 |
| C                                          | 32.845971000 | 30.305471000 | 50.140756000 |
| H                                          | 32.385381000 | 30.458092000 | 51.126343000 |
| H                                          | 32.569053000 | 29.302600000 | 49.804440000 |
| C                                          | 34.350545000 | 30.366723000 | 50.332188000 |
| O                                          | 34.891392000 | 31.489256000 | 50.556104000 |
| O                                          | 35.025148000 | 29.277316000 | 50.243796000 |
| C                                          | 37.604403000 | 37.229188000 | 56.086994000 |
| H                                          | 38.469433000 | 37.877538000 | 56.273425000 |
| H                                          | 37.189423000 | 36.992393000 | 57.076270000 |
| C                                          | 38.106290000 | 35.923251000 | 55.429460000 |
| H                                          | 38.330005000 | 36.111439000 | 54.369973000 |

|    |              |              |              |
|----|--------------|--------------|--------------|
| H  | 39.062113000 | 35.644641000 | 55.896784000 |
| C  | 37.122644000 | 34.743560000 | 55.549748000 |
| H  | 37.042849000 | 34.437390000 | 56.602977000 |
| H  | 36.114623000 | 35.069041000 | 55.262790000 |
| C  | 37.427481000 | 33.523619000 | 54.678780000 |
| H  | 36.689361000 | 32.727961000 | 54.797211000 |
| H  | 37.446428000 | 33.780024000 | 53.618660000 |
| N  | 38.781849000 | 32.910826000 | 54.955954000 |
| H  | 38.950508000 | 32.817135000 | 55.961426000 |
| H  | 38.893115000 | 31.936396000 | 54.523243000 |
| H  | 39.527938000 | 33.492752000 | 54.542058000 |
| C  | 37.079453000 | 36.170073000 | 50.478121000 |
| H  | 35.998400000 | 36.102305000 | 50.316971000 |
| H  | 37.533838000 | 36.558370000 | 49.560434000 |
| C  | 37.673197000 | 34.808020000 | 50.746289000 |
| O  | 38.922119000 | 34.692811000 | 50.810225000 |
| N  | 36.853869000 | 33.777318000 | 50.973016000 |
| H  | 37.256153000 | 32.887615000 | 51.285522000 |
| H  | 35.848993000 | 33.843498000 | 50.880400000 |
| C  | 40.010093000 | 33.065936000 | 46.934278000 |
| H  | 39.527427000 | 32.835736000 | 45.978139000 |
| H  | 41.093068000 | 33.033632000 | 46.757031000 |
| C  | 39.716709000 | 31.943923000 | 47.881649000 |
| O  | 39.686613000 | 30.746813000 | 47.328861000 |
| O  | 39.489239000 | 32.099877000 | 49.093765000 |
| Mg | 40.179101000 | 33.125252000 | 51.068571000 |
| O  | 38.757513000 | 31.911279000 | 51.825423000 |
| P  | 38.983085000 | 30.487823000 | 52.395371000 |
| O  | 37.889283000 | 29.500272000 | 51.938840000 |
| O  | 39.297906000 | 30.455027000 | 53.877347000 |
| O  | 40.334170000 | 29.889907000 | 51.520933000 |
| P  | 41.824547000 | 30.609633000 | 51.625352000 |
| O  | 41.575149000 | 31.974867000 | 52.263067000 |
| O  | 42.847465000 | 29.671176000 | 52.148364000 |
| O  | 42.114120000 | 30.933997000 | 50.036941000 |
| P  | 42.712837000 | 32.369692000 | 49.456848000 |
| O  | 41.831006000 | 33.510435000 | 49.950841000 |
| O  | 42.945875000 | 32.116067000 | 47.997275000 |
| O  | 44.188967000 | 32.477902000 | 50.162433000 |
| O  | 35.747041000 | 31.085849000 | 53.380015000 |
| H  | 36.318510000 | 30.320380000 | 53.199067000 |
| H  | 35.415820000 | 31.330064000 | 52.495865000 |
| C  | 44.454536000 | 33.371209000 | 51.261586000 |
| H  | 43.974223000 | 33.003516000 | 52.171058000 |

|    |              |              |              |
|----|--------------|--------------|--------------|
| H  | 45.538232000 | 33.381706000 | 51.392228000 |
| H  | 44.101073000 | 34.377539000 | 51.025733000 |
| C  | 49.850241000 | 33.747972000 | 49.207004000 |
| H  | 49.278343000 | 34.039277000 | 50.096511000 |
| H  | 50.912596000 | 33.778456000 | 49.468515000 |
| H  | 49.672797000 | 34.503535000 | 48.432785000 |
| C  | 32.345669000 | 31.385013000 | 49.167310000 |
| H  | 32.769731000 | 31.243517000 | 48.166984000 |
| H  | 31.255740000 | 31.343840000 | 49.078480000 |
| H  | 32.628702000 | 32.379866000 | 49.520754000 |
| C  | 36.569702000 | 38.022302000 | 55.269599000 |
| H  | 35.684231000 | 37.421973000 | 55.026858000 |
| H  | 36.224754000 | 38.895279000 | 55.833176000 |
| H  | 37.001242000 | 38.384084000 | 54.330065000 |
| C  | 37.395931000 | 37.108522000 | 51.657055000 |
| H  | 38.475752000 | 37.177996000 | 51.813348000 |
| H  | 37.011830000 | 38.112826000 | 51.454257000 |
| H  | 36.926925000 | 36.750008000 | 52.577151000 |
| C  | 39.582528000 | 34.418975000 | 47.496452000 |
| H  | 40.142788000 | 34.665169000 | 48.398405000 |
| H  | 39.769405000 | 35.201436000 | 46.753701000 |
| H  | 38.512805000 | 34.431312000 | 47.731008000 |
| C  | 41.338999000 | 26.451004000 | 54.389996000 |
| H  | 41.597098000 | 25.881297000 | 55.286824000 |
| H  | 40.306420000 | 26.213621000 | 54.118616000 |
| C  | 42.637669000 | 29.961500000 | 55.106183000 |
| H  | 41.692191000 | 30.422930000 | 54.812568000 |
| H  | 42.853548000 | 30.212054000 | 56.152198000 |
| H  | 43.441796000 | 30.362942000 | 54.489670000 |
| C  | 43.814000000 | 26.437008000 | 51.433004000 |
| H  | 44.521040000 | 25.771693000 | 51.943384000 |
| H  | 43.399321000 | 25.880303000 | 50.585938000 |
| C  | 46.133657000 | 29.475758000 | 51.183401000 |
| H  | 46.680245000 | 29.247441000 | 50.265686000 |
| H  | 45.430648000 | 30.300517000 | 51.024027000 |
| H  | 46.857108000 | 29.771821000 | 51.946811000 |
| O  | 40.690043000 | 34.176825000 | 53.091955000 |
| H  | 41.384823000 | 33.478089000 | 53.138409000 |
| H  | 41.135734000 | 35.036894000 | 53.035719000 |
| H  | 39.502782000 | 30.064666000 | 48.022720000 |
| Mg | 37.049139000 | 29.198277000 | 50.214718000 |
| O  | 36.573992000 | 27.159858000 | 50.101631000 |
| H  | 36.835067000 | 26.555481000 | 50.815721000 |
| H  | 35.601020000 | 27.252132000 | 50.153614000 |



|   |              |              |              |
|---|--------------|--------------|--------------|
| O | 39.048538000 | 28.820375000 | 49.344235000 |
| H | 39.668046000 | 29.087386000 | 50.077046000 |
| H | 39.302371000 | 27.919900000 | 49.079617000 |
| O | 37.051835000 | 30.919685000 | 49.158828000 |
| H | 37.851979000 | 31.469283000 | 49.301536000 |
| H | 36.278655000 | 31.378044000 | 49.594981000 |

dissociative TS (-4556.488156 A.U.)

|   |              |              |              |
|---|--------------|--------------|--------------|
| C | 42.619405000 | 28.447742000 | 55.010078000 |
| O | 43.618135000 | 27.773419000 | 55.242704000 |
| N | 41.427465000 | 27.879125000 | 54.646721000 |
| H | 40.670390000 | 28.478782000 | 54.345505000 |
| C | 42.303749000 | 25.918204000 | 53.291097000 |
| O | 42.568766000 | 24.722446000 | 53.244421000 |
| N | 42.791902000 | 26.825189000 | 52.398685000 |
| H | 42.558601000 | 27.818018000 | 52.463426000 |
| C | 44.538080000 | 27.662426000 | 50.828257000 |
| O | 44.375601000 | 28.017844000 | 49.650069000 |
| N | 45.429456000 | 28.283220000 | 51.637349000 |
| H | 45.375188000 | 28.096943000 | 52.632431000 |
| C | 49.348628000 | 32.404188000 | 48.646511000 |
| H | 49.871802000 | 32.194450000 | 47.703299000 |
| H | 49.631855000 | 31.595193000 | 49.334206000 |
| C | 47.829336000 | 32.333732000 | 48.387163000 |
| H | 47.291767000 | 32.484721000 | 49.336340000 |
| H | 47.532757000 | 33.166609000 | 47.733774000 |
| C | 47.408972000 | 31.004882000 | 47.724023000 |
| H | 48.007353000 | 30.868385000 | 46.814025000 |
| H | 47.661240000 | 30.154267000 | 48.371601000 |
| C | 45.942911000 | 30.904759000 | 47.279924000 |
| H | 45.639552000 | 31.811460000 | 46.748846000 |
| H | 45.793493000 | 30.053644000 | 46.611551000 |
| N | 44.957061000 | 30.732905000 | 48.408119000 |
| H | 45.214716000 | 31.294119000 | 49.228212000 |
| H | 44.017670000 | 31.141609000 | 48.167196000 |
| H | 44.835346000 | 29.750483000 | 48.743409000 |
| C | 33.144243000 | 30.080722000 | 49.199944000 |
| H | 32.503213000 | 29.241779000 | 49.502683000 |
| H | 33.501375000 | 29.816332000 | 48.195811000 |
| C | 34.363470000 | 30.049597000 | 50.120718000 |
| O | 34.670059000 | 31.051027000 | 50.808107000 |
| O | 35.012960000 | 28.934667000 | 50.128089000 |
| C | 37.606899000 | 37.252314000 | 56.102119000 |
| H | 38.494145000 | 37.884608000 | 56.227897000 |
| H | 37.215449000 | 37.078976000 | 57.113897000 |

|    |              |              |              |
|----|--------------|--------------|--------------|
| C  | 38.045808000 | 35.901933000 | 55.497331000 |
| H  | 38.257898000 | 36.030068000 | 54.426855000 |
| H  | 38.994813000 | 35.598985000 | 55.961945000 |
| C  | 37.005679000 | 34.783436000 | 55.689204000 |
| H  | 36.936785000 | 34.522108000 | 56.755233000 |
| H  | 36.009321000 | 35.149160000 | 55.410724000 |
| C  | 37.231953000 | 33.518598000 | 54.863189000 |
| H  | 36.460749000 | 32.769269000 | 55.049998000 |
| H  | 37.227751000 | 33.729009000 | 53.791876000 |
| N  | 38.557160000 | 32.852303000 | 55.133420000 |
| H  | 38.721317000 | 32.731992000 | 56.136639000 |
| H  | 38.592766000 | 31.888930000 | 54.674211000 |
| H  | 39.336420000 | 33.402584000 | 54.720914000 |
| C  | 36.935791000 | 36.111356000 | 50.581668000 |
| H  | 35.851816000 | 36.168117000 | 50.434144000 |
| H  | 37.406493000 | 36.362301000 | 49.622466000 |
| C  | 37.353944000 | 34.693348000 | 50.912681000 |
| O  | 38.545133000 | 34.464163000 | 51.234041000 |
| N  | 36.436495000 | 33.724198000 | 50.868471000 |
| H  | 36.711616000 | 32.764504000 | 51.079645000 |
| H  | 35.479248000 | 33.890236000 | 50.591895000 |
| C  | 39.690037000 | 32.982716000 | 46.983586000 |
| H  | 38.848772000 | 32.713609000 | 46.329328000 |
| H  | 40.604604000 | 32.820350000 | 46.405883000 |
| C  | 39.722150000 | 32.034288000 | 48.140938000 |
| O  | 40.181795000 | 30.803802000 | 47.893468000 |
| O  | 39.347963000 | 32.356785000 | 49.266749000 |
| Mg | 39.784348000 | 32.851524000 | 51.283997000 |
| O  | 38.137026000 | 31.502511000 | 51.603373000 |
| P  | 38.075401000 | 30.297941000 | 52.554573000 |
| O  | 37.476403000 | 28.992020000 | 52.071253000 |
| O  | 38.605338000 | 30.405899000 | 53.953685000 |
| O  | 40.060872000 | 29.496745000 | 51.456015000 |
| P  | 41.352659000 | 30.321308000 | 51.699380000 |
| O  | 40.949778000 | 31.624770000 | 52.441121000 |
| O  | 42.581048000 | 29.614335000 | 52.184447000 |
| O  | 41.741805000 | 30.934587000 | 50.146201000 |
| P  | 42.455290000 | 32.403237000 | 49.866209000 |
| O  | 41.578316000 | 33.488008000 | 50.485076000 |
| O  | 42.765598000 | 32.389313000 | 48.393740000 |
| O  | 43.899031000 | 32.351602000 | 50.632878000 |
| O  | 36.023786000 | 30.936081000 | 53.115776000 |
| H  | 35.678091000 | 30.168436000 | 53.601829000 |
| H  | 35.509053000 | 30.940925000 | 52.244951000 |

|    |              |              |              |
|----|--------------|--------------|--------------|
| C  | 44.078923000 | 32.792151000 | 51.991609000 |
| H  | 43.704934000 | 32.035266000 | 52.683737000 |
| H  | 45.153519000 | 32.928841000 | 52.130564000 |
| H  | 43.569124000 | 33.746176000 | 52.146794000 |
| C  | 49.850241000 | 33.747972000 | 49.207004000 |
| H  | 49.380218000 | 33.981022000 | 50.170114000 |
| H  | 50.933459000 | 33.720059000 | 49.361606000 |
| H  | 49.629776000 | 34.572605000 | 48.519113000 |
| C  | 32.345669000 | 31.385013000 | 49.167310000 |
| H  | 32.964618000 | 32.218617000 | 48.819297000 |
| H  | 31.490871000 | 31.290646000 | 48.490159000 |
| H  | 31.969045000 | 31.643987000 | 50.161765000 |
| C  | 36.569702000 | 38.022302000 | 55.269599000 |
| H  | 35.677004000 | 37.421301000 | 55.056634000 |
| H  | 36.235336000 | 38.917418000 | 55.804424000 |
| H  | 36.993972000 | 38.349293000 | 54.315006000 |
| C  | 37.395931000 | 37.108522000 | 51.657055000 |
| H  | 38.477341000 | 37.045591000 | 51.801348000 |
| H  | 37.143648000 | 38.129696000 | 51.356378000 |
| H  | 36.901272000 | 36.906246000 | 52.610124000 |
| C  | 39.582528000 | 34.418975000 | 47.496452000 |
| H  | 40.407256000 | 34.647066000 | 48.175422000 |
| H  | 39.618627000 | 35.119668000 | 46.656060000 |
| H  | 38.641802000 | 34.576592000 | 48.030507000 |
| C  | 41.339006000 | 26.451006000 | 54.389989000 |
| H  | 41.583710000 | 25.878349000 | 55.288279000 |
| H  | 40.310395000 | 26.212714000 | 54.104044000 |
| C  | 42.637668000 | 29.961499000 | 55.106183000 |
| H  | 41.699612000 | 30.432507000 | 54.804640000 |
| H  | 42.872068000 | 30.239425000 | 56.140810000 |
| H  | 43.436470000 | 30.330763000 | 54.463040000 |
| C  | 43.813993000 | 26.437007000 | 51.433011000 |
| H  | 44.537365000 | 25.774423000 | 51.922556000 |
| H  | 43.384181000 | 25.885617000 | 50.589183000 |
| C  | 46.133658000 | 29.475759000 | 51.183401000 |
| H  | 46.607625000 | 29.270695000 | 50.220961000 |
| H  | 45.449166000 | 30.327028000 | 51.103501000 |
| H  | 46.915148000 | 29.716978000 | 51.908073000 |
| O  | 40.476544000 | 33.887474000 | 53.377890000 |
| H  | 41.061173000 | 33.091085000 | 53.265618000 |
| H  | 40.999603000 | 34.671236000 | 53.147690000 |
| H  | 40.601614000 | 30.482988000 | 48.735905000 |
| Mg | 36.958511000 | 28.489947000 | 50.251672000 |
| O  | 36.099530000 | 26.593770000 | 50.030494000 |

|                                            |              |              |              |
|--------------------------------------------|--------------|--------------|--------------|
| H                                          | 36.166501000 | 25.854415000 | 50.654465000 |
| H                                          | 35.170495000 | 26.903623000 | 50.032701000 |
| O                                          | 38.892334000 | 27.827963000 | 49.824878000 |
| H                                          | 39.490105000 | 28.346889000 | 50.457878000 |
| H                                          | 39.218798000 | 26.916652000 | 49.798534000 |
| O                                          | 37.521560000 | 30.129263000 | 49.133417000 |
| H                                          | 38.328990000 | 29.960347000 | 48.614675000 |
| H                                          | 37.782202000 | 30.820330000 | 49.786014000 |
| <u>dissociative Pr (-4556.541640 A.U.)</u> |              |              |              |
| C                                          | 42.480200000 | 28.440743000 | 55.238670000 |
| O                                          | 43.309130000 | 27.770619000 | 55.841953000 |
| N                                          | 41.383287000 | 27.893085000 | 54.622910000 |
| H                                          | 40.903971000 | 28.442561000 | 53.912133000 |
| C                                          | 42.471029000 | 25.940541000 | 53.447865000 |
| O                                          | 43.018786000 | 24.862990000 | 53.628961000 |
| N                                          | 42.801818000 | 26.794260000 | 52.420694000 |
| H                                          | 42.111513000 | 27.500473000 | 52.152615000 |
| C                                          | 44.453601000 | 27.727319000 | 50.874761000 |
| O                                          | 44.048613000 | 28.291993000 | 49.849968000 |
| N                                          | 45.498886000 | 28.230082000 | 51.580933000 |
| H                                          | 45.730585000 | 27.819496000 | 52.475435000 |
| C                                          | 49.028040000 | 32.608850000 | 48.567344000 |
| H                                          | 49.281218000 | 32.551764000 | 47.499484000 |
| H                                          | 49.343550000 | 31.649733000 | 49.001259000 |
| C                                          | 47.490926000 | 32.729514000 | 48.691612000 |
| H                                          | 47.204458000 | 32.705055000 | 49.754244000 |
| H                                          | 47.170450000 | 33.709182000 | 48.309356000 |
| C                                          | 46.761660000 | 31.620106000 | 47.898164000 |
| H                                          | 47.143149000 | 31.637928000 | 46.868959000 |
| H                                          | 47.030933000 | 30.629158000 | 48.288289000 |
| C                                          | 45.231821000 | 31.728386000 | 47.765936000 |
| H                                          | 44.928528000 | 32.760540000 | 47.567850000 |
| H                                          | 44.876594000 | 31.111857000 | 46.936821000 |
| N                                          | 44.431587000 | 31.286665000 | 48.965237000 |
| H                                          | 44.771621000 | 31.717963000 | 49.830076000 |
| H                                          | 43.416252000 | 31.625235000 | 48.914961000 |
| H                                          | 44.415119000 | 30.258395000 | 49.122278000 |
| C                                          | 32.800721000 | 29.934200000 | 49.374949000 |
| H                                          | 31.935167000 | 29.256100000 | 49.387084000 |
| H                                          | 33.441097000 | 29.585844000 | 48.558086000 |
| C                                          | 33.558223000 | 29.687265000 | 50.656868000 |
| O                                          | 33.342912000 | 30.591601000 | 51.581807000 |
| O                                          | 34.299159000 | 28.702912000 | 50.817630000 |
| C                                          | 37.901715000 | 37.434815000 | 55.754502000 |

|    |              |              |              |
|----|--------------|--------------|--------------|
| H  | 38.717530000 | 37.856424000 | 55.154032000 |
| H  | 38.091345000 | 37.754310000 | 56.788248000 |
| C  | 37.978776000 | 35.900137000 | 55.667592000 |
| H  | 37.724890000 | 35.588382000 | 54.644594000 |
| H  | 39.019651000 | 35.586770000 | 55.827278000 |
| C  | 37.064155000 | 35.172160000 | 56.669569000 |
| H  | 37.508840000 | 35.191108000 | 57.674364000 |
| H  | 36.106368000 | 35.698522000 | 56.757572000 |
| C  | 36.720241000 | 33.740259000 | 56.271287000 |
| H  | 36.054691000 | 33.267983000 | 56.999365000 |
| H  | 36.221403000 | 33.715612000 | 55.298009000 |
| N  | 37.908427000 | 32.838606000 | 56.135952000 |
| H  | 38.381285000 | 32.687432000 | 57.029856000 |
| H  | 37.573266000 | 31.891890000 | 55.714423000 |
| H  | 38.603856000 | 33.171443000 | 55.444360000 |
| C  | 36.165807000 | 36.210559000 | 51.618340000 |
| H  | 35.370736000 | 36.593329000 | 52.271269000 |
| H  | 35.740489000 | 36.194580000 | 50.604784000 |
| C  | 36.462526000 | 34.771924000 | 52.001022000 |
| O  | 37.640097000 | 34.353903000 | 52.066147000 |
| N  | 35.410922000 | 33.987089000 | 52.270095000 |
| H  | 35.586258000 | 32.986720000 | 52.427668000 |
| H  | 34.467913000 | 34.329592000 | 52.153627000 |
| C  | 38.286477000 | 33.599096000 | 47.660718000 |
| H  | 37.470432000 | 34.230974000 | 48.021467000 |
| H  | 37.999110000 | 33.164278000 | 46.697877000 |
| C  | 38.498721000 | 32.479886000 | 48.647029000 |
| O  | 39.133539000 | 31.455030000 | 48.152043000 |
| O  | 38.118456000 | 32.557311000 | 49.829941000 |
| Mg | 38.541349000 | 32.498992000 | 51.845067000 |
| O  | 36.697082000 | 31.572149000 | 52.483130000 |
| P  | 36.408545000 | 30.513089000 | 53.589227000 |
| O  | 36.465514000 | 29.064480000 | 53.070829000 |
| O  | 37.037162000 | 30.721156000 | 54.949718000 |
| O  | 39.390056000 | 29.671729000 | 49.993148000 |
| P  | 40.120548000 | 29.784692000 | 51.378418000 |
| O  | 39.294645000 | 30.684006000 | 52.328197000 |
| O  | 40.515315000 | 28.446472000 | 51.944098000 |
| O  | 41.529474000 | 30.649470000 | 51.123490000 |
| P  | 41.689506000 | 32.229826000 | 50.740804000 |
| O  | 40.569142000 | 33.040129000 | 51.396549000 |
| O  | 41.971433000 | 32.358387000 | 49.266362000 |
| O  | 43.115670000 | 32.573448000 | 51.476268000 |
| O  | 34.744339000 | 30.799754000 | 53.803999000 |

|   |              |              |              |
|---|--------------|--------------|--------------|
| H | 34.451175000 | 30.373994000 | 54.627034000 |
| H | 33.872348000 | 30.466403000 | 52.428819000 |
| C | 43.154914000 | 33.095103000 | 52.808020000 |
| H | 42.701143000 | 32.400730000 | 53.523037000 |
| H | 44.208450000 | 33.224512000 | 53.065825000 |
| H | 42.651646000 | 34.066057000 | 52.855826000 |
| C | 49.850241000 | 33.747972000 | 49.207004000 |
| H | 49.667190000 | 33.820351000 | 50.285778000 |
| H | 50.920450000 | 33.572818000 | 49.059676000 |
| H | 49.602345000 | 34.717206000 | 48.758917000 |
| C | 32.345669000 | 31.385013000 | 49.167310000 |
| H | 33.200951000 | 32.067828000 | 49.154173000 |
| H | 31.826555000 | 31.473971000 | 48.208314000 |
| H | 31.663215000 | 31.705523000 | 49.958140000 |
| C | 36.569702000 | 38.022302000 | 55.269599000 |
| H | 35.723404000 | 37.697293000 | 55.886012000 |
| H | 36.592187000 | 39.116481000 | 55.309759000 |
| H | 36.358777000 | 37.734437000 | 54.234586000 |
| C | 37.395931000 | 37.108522000 | 51.657055000 |
| H | 38.153175000 | 36.760720000 | 50.949601000 |
| H | 37.123131000 | 38.134956000 | 51.393009000 |
| H | 37.856442000 | 37.121226000 | 52.647766000 |
| C | 39.582528000 | 34.418975000 | 47.496452000 |
| H | 40.407946000 | 33.778042000 | 47.177580000 |
| H | 39.431844000 | 35.204957000 | 46.749793000 |
| H | 39.870517000 | 34.888049000 | 48.442289000 |
| C | 41.339000000 | 26.451003000 | 54.389996000 |
| H | 41.459629000 | 25.909087000 | 55.328524000 |
| H | 40.364800000 | 26.209057000 | 53.955247000 |
| C | 42.637669000 | 29.961501000 | 55.106183000 |
| H | 41.674180000 | 30.483740000 | 55.078458000 |
| H | 43.234561000 | 30.324576000 | 55.944847000 |
| H | 43.170752000 | 30.177173000 | 54.172449000 |
| C | 43.814000000 | 26.437008000 | 51.433003000 |
| H | 44.549754000 | 25.793560000 | 51.922201000 |
| H | 43.392153000 | 25.891949000 | 50.579143000 |
| C | 46.133657000 | 29.475758000 | 51.183401000 |
| H | 46.383040000 | 29.437421000 | 50.120603000 |
| H | 45.485066000 | 30.338909000 | 51.384141000 |
| H | 47.057475000 | 29.599667000 | 51.753234000 |
| O | 39.576709000 | 32.740721000 | 53.902553000 |
| H | 39.678184000 | 31.769699000 | 53.723725000 |
| H | 40.303580000 | 33.138875000 | 53.380373000 |
| H | 39.339834000 | 30.754342000 | 48.868955000 |

|    |              |              |              |
|----|--------------|--------------|--------------|
| Mg | 36.284842000 | 28.346717000 | 51.261039000 |
| O  | 35.895309000 | 26.549303000 | 52.290458000 |
| H  | 35.919122000 | 26.910018000 | 53.197456000 |
| H  | 35.084065000 | 26.024198000 | 52.209778000 |
| O  | 37.927095000 | 27.468675000 | 50.408118000 |
| H  | 38.582293000 | 28.160490000 | 50.091010000 |
| H  | 38.458935000 | 26.888605000 | 50.978903000 |
| O  | 36.716286000 | 30.031445000 | 50.197104000 |
| H  | 37.701391000 | 30.026165000 | 50.043298000 |
| H  | 36.601762000 | 30.755239000 | 50.860574000 |

## 5. Model for AceK-ICDH

associative Re (-4395.604049 A.U.)

|   |              |              |              |
|---|--------------|--------------|--------------|
| C | 71.448027000 | 60.735227000 | 31.209982000 |
| O | 72.310617000 | 59.948794000 | 30.813078000 |
| N | 71.712143000 | 61.671437000 | 32.168336000 |
| H | 70.971617000 | 62.256643000 | 32.564592000 |
| C | 73.422103000 | 60.541471000 | 33.667163000 |
| O | 74.602975000 | 60.340885000 | 33.941274000 |
| N | 72.394662000 | 59.784425000 | 34.138768000 |
| H | 71.434121000 | 60.036133000 | 33.916828000 |
| C | 71.771759000 | 57.402486000 | 34.717942000 |
| O | 71.586908000 | 56.574444000 | 35.607004000 |
| N | 71.294651000 | 57.266731000 | 33.446839000 |
| H | 71.371084000 | 58.086283000 | 32.857795000 |
| C | 65.242026000 | 53.170431000 | 32.079509000 |
| H | 65.884949000 | 54.001374000 | 32.395285000 |
| H | 64.696363000 | 53.524539000 | 31.192536000 |
| C | 64.231074000 | 52.834070000 | 33.186550000 |
| H | 63.609063000 | 51.990683000 | 32.855330000 |
| H | 64.770825000 | 52.480873000 | 34.077549000 |
| C | 63.312461000 | 54.003926000 | 33.579795000 |
| H | 62.807847000 | 54.386595000 | 32.679092000 |
| H | 62.518732000 | 53.640013000 | 34.248453000 |
| C | 64.060253000 | 55.153824000 | 34.262044000 |
| H | 64.508959000 | 54.811886000 | 35.201979000 |
| H | 64.880755000 | 55.512201000 | 33.636524000 |
| N | 63.236427000 | 56.341268000 | 34.578507000 |
| H | 62.516101000 | 56.117615000 | 35.264386000 |
| H | 64.310334000 | 57.481904000 | 35.009179000 |
| H | 62.753420000 | 56.667426000 | 33.741170000 |
| C | 66.103640000 | 68.005169000 | 38.845935000 |
| H | 66.010973000 | 69.068964000 | 39.105179000 |

|   |              |              |              |
|---|--------------|--------------|--------------|
| H | 67.057042000 | 67.682130000 | 39.282923000 |
| C | 66.253812000 | 67.919505000 | 37.320049000 |
| O | 67.261981000 | 68.543122000 | 36.843020000 |
| O | 65.398935000 | 67.278777000 | 36.658329000 |
| C | 63.893814000 | 66.311364000 | 31.317435000 |
| H | 64.189708000 | 65.340289000 | 31.733413000 |
| H | 64.344259000 | 66.365213000 | 30.316447000 |
| C | 64.448294000 | 67.433346000 | 32.205516000 |
| H | 64.230849000 | 68.410787000 | 31.748704000 |
| H | 63.892709000 | 67.419704000 | 33.154069000 |
| C | 65.950886000 | 67.332953000 | 32.533686000 |
| H | 66.201351000 | 66.293955000 | 32.777444000 |
| H | 66.560186000 | 67.614282000 | 31.663643000 |
| C | 66.258562000 | 68.216577000 | 33.742878000 |
| H | 66.122708000 | 69.277911000 | 33.504708000 |
| H | 65.575723000 | 67.970625000 | 34.561162000 |
| N | 67.621217000 | 68.070796000 | 34.340070000 |
| H | 68.307863000 | 68.693800000 | 33.914209000 |
| H | 67.512889000 | 68.305799000 | 35.452575000 |
| H | 68.054847000 | 67.118297000 | 34.291600000 |
| C | 62.938367000 | 64.864429000 | 34.987135000 |
| H | 62.895101000 | 65.947521000 | 34.820396000 |
| H | 62.849309000 | 64.730400000 | 36.073336000 |
| C | 64.295361000 | 64.344714000 | 34.555947000 |
| O | 64.332814000 | 63.354910000 | 33.778638000 |
| N | 65.379093000 | 64.957774000 | 35.010405000 |
| H | 66.279738000 | 64.554731000 | 34.723119000 |
| H | 65.340736000 | 65.741063000 | 35.673953000 |
| C | 64.815720000 | 61.213514000 | 37.891167000 |
| H | 64.498492000 | 61.962770000 | 38.625612000 |
| H | 65.551119000 | 60.578492000 | 38.403110000 |
| C | 65.620200000 | 61.927825000 | 36.821557000 |
| O | 65.591135000 | 61.584538000 | 35.635640000 |
| O | 66.336655000 | 62.917764000 | 37.297429000 |
| C | 69.463719000 | 60.847370000 | 39.768894000 |
| H | 69.852566000 | 61.694008000 | 40.343764000 |
| H | 70.297251000 | 60.143099000 | 39.640006000 |
| C | 69.042136000 | 61.327876000 | 38.390029000 |
| O | 68.175818000 | 60.762901000 | 37.745464000 |
| O | 69.708853000 | 62.411388000 | 37.999431000 |
| O | 67.242452000 | 63.339045000 | 33.757643000 |
| P | 68.575820000 | 63.038748000 | 34.488176000 |
| O | 68.494502000 | 63.575447000 | 35.942020000 |
| O | 69.829978000 | 63.396262000 | 33.717063000 |



|    |              |              |              |
|----|--------------|--------------|--------------|
| O  | 68.590251000 | 61.359115000 | 34.752869000 |
| P  | 68.279736000 | 60.230478000 | 33.665392000 |
| O  | 67.387269000 | 60.822908000 | 32.580043000 |
| O  | 69.472020000 | 59.405841000 | 33.335916000 |
| O  | 67.187308000 | 59.224775000 | 34.516877000 |
| P  | 65.729081000 | 58.852925000 | 34.009987000 |
| O  | 64.920610000 | 59.996859000 | 33.438588000 |
| O  | 65.108750000 | 58.094278000 | 35.236385000 |
| O  | 65.861322000 | 57.653023000 | 32.923900000 |
| Mg | 65.801902000 | 61.981718000 | 33.522141000 |
| O  | 69.448184000 | 66.036196000 | 34.632714000 |
| H  | 69.227904000 | 65.537556000 | 35.444226000 |
| H  | 69.745860000 | 65.292706000 | 34.057708000 |
| C  | 66.413189000 | 57.878776000 | 31.615328000 |
| H  | 67.488168000 | 58.061814000 | 31.681214000 |
| H  | 66.225616000 | 56.965354000 | 31.046352000 |
| H  | 65.926008000 | 58.726661000 | 31.126547000 |
| C  | 66.126789000 | 51.982015000 | 31.695881000 |
| H  | 66.832688000 | 52.251541000 | 30.902548000 |
| H  | 66.712111000 | 51.631657000 | 32.554583000 |
| H  | 65.526248000 | 51.136594000 | 31.336553000 |
| C  | 70.163179000 | 56.391444000 | 33.159156000 |
| H  | 70.204630000 | 56.071772000 | 32.112291000 |
| H  | 70.236008000 | 55.516131000 | 33.807616000 |
| H  | 69.214827000 | 56.906106000 | 33.348659000 |
| C  | 72.623034000 | 58.656971000 | 35.017016000 |
| H  | 72.411518000 | 58.904601000 | 36.064270000 |
| H  | 73.685840000 | 58.403601000 | 34.950535000 |
| C  | 73.032994000 | 61.737024000 | 32.780001000 |
| H  | 73.070597000 | 62.641239000 | 33.395461000 |
| H  | 73.808836000 | 61.805189000 | 32.012842000 |
| C  | 70.034184000 | 60.698192000 | 30.637991000 |
| H  | 70.105334000 | 60.838720000 | 29.552906000 |
| H  | 69.612839000 | 59.711883000 | 30.832137000 |
| H  | 69.369615000 | 61.452547000 | 31.061682000 |
| C  | 68.291755000 | 60.164557000 | 40.471254000 |
| H  | 67.910740000 | 59.345078000 | 39.856875000 |
| H  | 68.592865000 | 59.763551000 | 41.446611000 |
| H  | 67.469139000 | 60.870108000 | 40.634501000 |
| C  | 64.938028000 | 67.198099000 | 39.416220000 |
| H  | 65.049541000 | 66.135008000 | 39.180001000 |
| H  | 64.881859000 | 67.304607000 | 40.506850000 |
| H  | 63.986701000 | 67.527820000 | 38.986237000 |
| C  | 62.363476000 | 66.367999000 | 31.201856000 |

|                                           |              |              |              |
|-------------------------------------------|--------------|--------------|--------------|
| H                                         | 61.978378000 | 65.535417000 | 30.601823000 |
| H                                         | 61.888739000 | 66.316906000 | 32.187927000 |
| H                                         | 62.033297000 | 67.301422000 | 30.726731000 |
| C                                         | 61.830353000 | 64.128503000 | 34.247834000 |
| H                                         | 61.847718000 | 63.061149000 | 34.483437000 |
| H                                         | 60.847861000 | 64.526846000 | 34.530363000 |
| H                                         | 61.942219000 | 64.222323000 | 33.165891000 |
| C                                         | 63.637433000 | 60.372281000 | 37.385575000 |
| H                                         | 63.136197000 | 59.888230000 | 38.232015000 |
| H                                         | 62.899737000 | 60.993731000 | 36.864379000 |
| H                                         | 63.982500000 | 59.602520000 | 36.693736000 |
| H                                         | 69.329668000 | 62.755996000 | 37.132280000 |
| H                                         | 67.097321000 | 63.196504000 | 36.670843000 |
| O                                         | 65.270852000 | 61.845386000 | 31.387159000 |
| H                                         | 66.181791000 | 61.525881000 | 31.223565000 |
| H                                         | 64.777856000 | 61.020026000 | 31.549351000 |
| <u>associative TS (-4395.560534 A.U.)</u> |              |              |              |
| C                                         | 71.481562000 | 60.835635000 | 31.106349000 |
| O                                         | 72.389216000 | 60.221618000 | 30.550410000 |
| N                                         | 71.714495000 | 61.670144000 | 32.166723000 |
| H                                         | 70.940419000 | 62.099174000 | 32.663510000 |
| C                                         | 73.441177000 | 60.527772000 | 33.644075000 |
| O                                         | 74.629389000 | 60.303851000 | 33.860427000 |
| N                                         | 72.413661000 | 59.800830000 | 34.155243000 |
| H                                         | 71.456890000 | 60.108444000 | 34.000007000 |
| C                                         | 71.928654000 | 57.340696000 | 34.598865000 |
| O                                         | 72.064959000 | 56.338753000 | 35.297898000 |
| N                                         | 71.180358000 | 57.383093000 | 33.460467000 |
| H                                         | 70.986300000 | 58.304275000 | 33.093919000 |
| C                                         | 65.305239000 | 53.194437000 | 32.141532000 |
| H                                         | 65.990785000 | 53.995644000 | 32.444326000 |
| H                                         | 64.733987000 | 53.585753000 | 31.286962000 |
| C                                         | 64.333379000 | 52.870910000 | 33.286559000 |
| H                                         | 63.675602000 | 52.048704000 | 32.971811000 |
| H                                         | 64.900451000 | 52.491820000 | 34.149476000 |
| C                                         | 63.461723000 | 54.057392000 | 33.733096000 |
| H                                         | 62.924990000 | 54.461320000 | 32.860804000 |
| H                                         | 62.691355000 | 53.702119000 | 34.433186000 |
| C                                         | 64.260398000 | 55.184451000 | 34.395788000 |
| H                                         | 64.758641000 | 54.817075000 | 35.300583000 |
| H                                         | 65.047046000 | 55.552310000 | 33.732842000 |
| N                                         | 63.463604000 | 56.368819000 | 34.786851000 |
| H                                         | 62.771999000 | 56.126090000 | 35.495756000 |
| H                                         | 64.540105000 | 57.503637000 | 35.217094000 |

|   |              |              |              |
|---|--------------|--------------|--------------|
| H | 62.944864000 | 56.722741000 | 33.982619000 |
| C | 66.053498000 | 68.089864000 | 38.870761000 |
| H | 65.840714000 | 69.146041000 | 39.093466000 |
| H | 67.013280000 | 67.871658000 | 39.353013000 |
| C | 66.255021000 | 67.979656000 | 37.348003000 |
| O | 67.351993000 | 68.427442000 | 36.900564000 |
| O | 65.309980000 | 67.485293000 | 36.665913000 |
| C | 63.870828000 | 66.120664000 | 31.367630000 |
| H | 64.036426000 | 65.124973000 | 31.799016000 |
| H | 64.354499000 | 66.108335000 | 30.380743000 |
| C | 64.531319000 | 67.176360000 | 32.262795000 |
| H | 64.434530000 | 68.167370000 | 31.792775000 |
| H | 63.958226000 | 67.237924000 | 33.199381000 |
| C | 66.006434000 | 66.919674000 | 32.623731000 |
| H | 66.135422000 | 65.887918000 | 32.971093000 |
| H | 66.646803000 | 67.038778000 | 31.738058000 |
| C | 66.409919000 | 67.882617000 | 33.740068000 |
| H | 66.385227000 | 68.920898000 | 33.385168000 |
| H | 65.705156000 | 67.804492000 | 34.573355000 |
| N | 67.746434000 | 67.649349000 | 34.364705000 |
| H | 68.495187000 | 68.125210000 | 33.860669000 |
| H | 67.676047000 | 68.038700000 | 35.369414000 |
| H | 68.109043000 | 66.598141000 | 34.505235000 |
| C | 62.813617000 | 64.838737000 | 35.174465000 |
| H | 62.799808000 | 65.926419000 | 35.035142000 |
| H | 62.551443000 | 64.670253000 | 36.227677000 |
| C | 64.221799000 | 64.323098000 | 34.945208000 |
| O | 64.354320000 | 63.308212000 | 34.211537000 |
| N | 65.238666000 | 64.951610000 | 35.515056000 |
| H | 66.177507000 | 64.607836000 | 35.287317000 |
| H | 65.145657000 | 65.836885000 | 36.037948000 |
| C | 65.019671000 | 60.580371000 | 38.004428000 |
| H | 64.963448000 | 60.977980000 | 39.022483000 |
| H | 65.548559000 | 59.619403000 | 38.069037000 |
| C | 65.908752000 | 61.487724000 | 37.178267000 |
| O | 65.779280000 | 61.570412000 | 35.955264000 |
| O | 66.807570000 | 62.127913000 | 37.879218000 |
| C | 69.787551000 | 60.315693000 | 40.131206000 |
| H | 70.263039000 | 60.989677000 | 40.853006000 |
| H | 70.290455000 | 59.345288000 | 40.171973000 |
| C | 69.970400000 | 60.878394000 | 38.729648000 |
| O | 70.217364000 | 60.203851000 | 37.750861000 |
| O | 69.776237000 | 62.206746000 | 38.715728000 |
| O | 67.287244000 | 63.457464000 | 34.284777000 |

|    |              |              |              |
|----|--------------|--------------|--------------|
| P  | 68.606171000 | 63.219362000 | 35.033534000 |
| O  | 68.662183000 | 63.381321000 | 36.554972000 |
| O  | 69.975876000 | 63.362811000 | 34.171590000 |
| O  | 68.691897000 | 61.469771000 | 35.029420000 |
| P  | 68.387294000 | 60.440939000 | 33.870256000 |
| O  | 67.454041000 | 61.070266000 | 32.837642000 |
| O  | 69.570593000 | 59.659368000 | 33.418793000 |
| O  | 67.349755000 | 59.330997000 | 34.674040000 |
| P  | 65.887949000 | 58.935732000 | 34.203156000 |
| O  | 65.037772000 | 60.078094000 | 33.693675000 |
| O  | 65.326600000 | 58.136832000 | 35.434006000 |
| O  | 66.013294000 | 57.770770000 | 33.081161000 |
| Mg | 65.889626000 | 62.074513000 | 33.873636000 |
| O  | 68.950003000 | 65.417725000 | 34.883513000 |
| H  | 69.204458000 | 65.596469000 | 35.803114000 |
| H  | 70.028365000 | 64.367096000 | 34.170822000 |
| C  | 66.502507000 | 58.070568000 | 31.761148000 |
| H  | 67.557019000 | 58.352954000 | 31.799795000 |
| H  | 66.383870000 | 57.154365000 | 31.179012000 |
| H  | 65.920618000 | 58.877225000 | 31.306278000 |
| C  | 66.126789000 | 51.982015000 | 31.695881000 |
| H  | 66.806934000 | 52.241499000 | 30.877162000 |
| H  | 66.735352000 | 51.592121000 | 32.520695000 |
| H  | 65.478903000 | 51.167607000 | 31.347633000 |
| C  | 70.163182000 | 56.391445000 | 33.159158000 |
| H  | 70.185316000 | 56.125836000 | 32.094996000 |
| H  | 70.372856000 | 55.499957000 | 33.754504000 |
| H  | 69.164098000 | 56.769069000 | 33.413372000 |
| C  | 72.623029000 | 58.656979000 | 35.017007000 |
| H  | 72.260573000 | 58.867690000 | 36.031586000 |
| H  | 73.699117000 | 58.478449000 | 35.075373000 |
| C  | 73.032987000 | 61.737014000 | 32.780004000 |
| H  | 73.070468000 | 62.632096000 | 33.409664000 |
| H  | 73.795924000 | 61.825330000 | 32.003975000 |
| C  | 70.034191000 | 60.698193000 | 30.637994000 |
| H  | 70.017158000 | 60.830753000 | 29.550757000 |
| H  | 69.696535000 | 59.686050000 | 30.867535000 |
| H  | 69.346185000 | 61.401403000 | 31.110024000 |
| C  | 68.291755000 | 60.164557000 | 40.471255000 |
| H  | 67.810950000 | 59.463488000 | 39.780230000 |
| H  | 68.163874000 | 59.780769000 | 41.490354000 |
| H  | 67.778527000 | 61.126562000 | 40.388953000 |
| C  | 64.938027000 | 67.198099000 | 39.416221000 |
| H  | 65.164690000 | 66.139425000 | 39.246779000 |

|   |              |              |              |
|---|--------------|--------------|--------------|
| H | 64.801133000 | 67.345238000 | 40.495443000 |
| H | 63.993075000 | 67.414011000 | 38.909342000 |
| C | 62.363476000 | 66.367999000 | 31.201856000 |
| H | 61.895357000 | 65.593619000 | 30.582554000 |
| H | 61.853655000 | 66.373268000 | 32.172042000 |
| H | 62.170388000 | 67.337651000 | 30.724358000 |
| C | 61.830354000 | 64.128503000 | 34.247834000 |
| H | 61.809156000 | 63.055378000 | 34.452956000 |
| H | 60.817538000 | 64.526754000 | 34.386493000 |
| H | 62.108755000 | 64.254528000 | 33.199774000 |
| C | 63.637433000 | 60.372281000 | 37.385575000 |
| H | 63.059652000 | 59.653300000 | 37.978157000 |
| H | 63.073462000 | 61.311601000 | 37.353451000 |
| H | 63.727347000 | 59.996720000 | 36.365619000 |
| H | 69.657218000 | 62.531373000 | 37.783537000 |
| H | 67.479877000 | 62.643140000 | 37.294836000 |
| O | 65.306591000 | 62.089294000 | 31.733420000 |
| H | 66.194894000 | 61.723087000 | 31.544124000 |
| H | 64.754009000 | 61.294053000 | 31.834316000 |

associative Pr (-4395.627029 A.U.)

|   |              |              |              |
|---|--------------|--------------|--------------|
| C | 71.494270000 | 61.055341000 | 30.960002000 |
| O | 72.403938000 | 60.816573000 | 30.170017000 |
| N | 71.698404000 | 61.644130000 | 32.184270000 |
| H | 70.894752000 | 61.644317000 | 32.811249000 |
| C | 73.443265000 | 60.523006000 | 33.639026000 |
| O | 74.626017000 | 60.210366000 | 33.749275000 |
| N | 72.418911000 | 59.876052000 | 34.263049000 |
| H | 71.469829000 | 60.239579000 | 34.198144000 |
| C | 71.975853000 | 57.389968000 | 34.434056000 |
| O | 72.458806000 | 56.281340000 | 34.662630000 |
| N | 70.843043000 | 57.554001000 | 33.703266000 |
| H | 70.394754000 | 58.464946000 | 33.640640000 |
| C | 65.510882000 | 53.377451000 | 31.833331000 |
| H | 66.176389000 | 54.002691000 | 32.441686000 |
| H | 65.461495000 | 53.856619000 | 30.844980000 |
| C | 64.104229000 | 53.347806000 | 32.448708000 |
| H | 63.469465000 | 52.681069000 | 31.847993000 |
| H | 64.155547000 | 52.894375000 | 33.450082000 |
| C | 63.418513000 | 54.720758000 | 32.549531000 |
| H | 63.370992000 | 55.182672000 | 31.552099000 |
| H | 62.376719000 | 54.579465000 | 32.874127000 |
| C | 64.106021000 | 55.690224000 | 33.518952000 |
| H | 64.176769000 | 55.236062000 | 34.515185000 |
| H | 65.130638000 | 55.901848000 | 33.198339000 |

|   |              |              |              |
|---|--------------|--------------|--------------|
| N | 63.438285000 | 56.995185000 | 33.672596000 |
| H | 62.480977000 | 56.882682000 | 34.003370000 |
| H | 64.467429000 | 58.022549000 | 34.446345000 |
| H | 63.402424000 | 57.485974000 | 32.778966000 |
| C | 66.349804000 | 67.557027000 | 38.946961000 |
| H | 66.736015000 | 68.422841000 | 39.503436000 |
| H | 67.046753000 | 66.734841000 | 39.146873000 |
| C | 66.443674000 | 67.896396000 | 37.454011000 |
| O | 67.636643000 | 67.932317000 | 36.961214000 |
| O | 65.404183000 | 68.104848000 | 36.793529000 |
| C | 63.890374000 | 66.250807000 | 31.148201000 |
| H | 64.198023000 | 65.225003000 | 31.381404000 |
| H | 64.242154000 | 66.439510000 | 30.124817000 |
| C | 64.573918000 | 67.224281000 | 32.121330000 |
| H | 64.584974000 | 68.239901000 | 31.698175000 |
| H | 63.966009000 | 67.294837000 | 33.034552000 |
| C | 65.989602000 | 66.800129000 | 32.538864000 |
| H | 65.954485000 | 65.756101000 | 32.871804000 |
| H | 66.673906000 | 66.824217000 | 31.680201000 |
| C | 66.499741000 | 67.690949000 | 33.669856000 |
| H | 66.836238000 | 68.667900000 | 33.307101000 |
| H | 65.727290000 | 67.872603000 | 34.422676000 |
| N | 67.632860000 | 67.092638000 | 34.443043000 |
| H | 68.533994000 | 67.149735000 | 33.964983000 |
| H | 67.694257000 | 67.581609000 | 35.407849000 |
| H | 67.484523000 | 66.083121000 | 34.671300000 |
| C | 62.665529000 | 65.187574000 | 34.962393000 |
| H | 62.633963000 | 66.136369000 | 34.410460000 |
| H | 62.250998000 | 65.405808000 | 35.953918000 |
| C | 64.128311000 | 64.801942000 | 35.141575000 |
| O | 64.651959000 | 63.882499000 | 34.468633000 |
| N | 64.817870000 | 65.489611000 | 36.048377000 |
| H | 65.805506000 | 65.244872000 | 36.154619000 |
| H | 64.510602000 | 66.369032000 | 36.458855000 |
| C | 64.955420000 | 60.565319000 | 38.138478000 |
| H | 64.848591000 | 60.430443000 | 39.220089000 |
| H | 65.688064000 | 59.820919000 | 37.795502000 |
| C | 65.605867000 | 61.901844000 | 37.873352000 |
| O | 65.395138000 | 62.547313000 | 36.844176000 |
| O | 66.423226000 | 62.312742000 | 38.814854000 |
| C | 69.738761000 | 60.692531000 | 40.401568000 |
| H | 70.064551000 | 61.030669000 | 41.391298000 |
| H | 70.419096000 | 59.914660000 | 40.045439000 |
| C | 69.781266000 | 61.849801000 | 39.432051000 |

|    |              |              |              |
|----|--------------|--------------|--------------|
| O  | 70.116999000 | 61.718586000 | 38.261056000 |
| O  | 69.338379000 | 62.980158000 | 39.974934000 |
| O  | 67.429450000 | 64.467250000 | 35.610001000 |
| P  | 68.562391000 | 64.502713000 | 36.674400000 |
| O  | 68.046397000 | 64.247755000 | 38.099394000 |
| O  | 69.752597000 | 63.534636000 | 36.273213000 |
| O  | 67.722721000 | 61.230117000 | 35.611003000 |
| P  | 68.218223000 | 61.038717000 | 34.166945000 |
| O  | 67.682878000 | 62.253482000 | 33.361765000 |
| O  | 69.606213000 | 60.520816000 | 33.877083000 |
| O  | 67.214878000 | 59.708506000 | 33.585809000 |
| P  | 65.647948000 | 59.771785000 | 33.778905000 |
| O  | 65.127730000 | 61.136573000 | 34.152003000 |
| O  | 65.230938000 | 58.618242000 | 34.778173000 |
| O  | 65.025149000 | 59.219609000 | 32.383278000 |
| Mg | 66.364884000 | 62.709046000 | 34.998770000 |
| O  | 69.286491000 | 65.934582000 | 36.595648000 |
| H  | 68.725548000 | 66.668496000 | 36.983398000 |
| H  | 69.871501000 | 62.790686000 | 36.924042000 |
| C  | 65.433725000 | 59.844161000 | 31.143538000 |
| H  | 66.478214000 | 59.594860000 | 30.934905000 |
| H  | 64.789544000 | 59.423953000 | 30.367258000 |
| H  | 65.313416000 | 60.931299000 | 31.187559000 |
| C  | 66.126789000 | 51.982015000 | 31.695881000 |
| H  | 67.126725000 | 52.029984000 | 31.250806000 |
| H  | 66.221939000 | 51.493061000 | 32.673227000 |
| H  | 65.508023000 | 51.335235000 | 31.060883000 |
| C  | 70.163173000 | 56.391441000 | 33.159155000 |
| H  | 70.808086000 | 55.860786000 | 32.449611000 |
| H  | 69.887250000 | 55.684584000 | 33.951295000 |
| H  | 69.259310000 | 56.727531000 | 32.645038000 |
| C  | 72.623041000 | 58.656978000 | 35.017011000 |
| H  | 72.249237000 | 58.777546000 | 36.043729000 |
| H  | 73.696712000 | 58.472997000 | 35.070619000 |
| C  | 73.032987000 | 61.737020000 | 32.780006000 |
| H  | 73.093024000 | 62.642072000 | 33.396267000 |
| H  | 73.761524000 | 61.812987000 | 31.972775000 |
| C  | 70.034190000 | 60.698192000 | 30.637992000 |
| H  | 69.921522000 | 60.669037000 | 29.551852000 |
| H  | 69.817837000 | 59.704915000 | 31.046191000 |
| H  | 69.319672000 | 61.397167000 | 31.081298000 |
| C  | 68.291755000 | 60.164557000 | 40.471254000 |
| H  | 67.962200000 | 59.823027000 | 39.485683000 |
| H  | 68.230254000 | 59.319484000 | 41.167056000 |

|   |              |              |              |
|---|--------------|--------------|--------------|
| H | 67.607878000 | 60.947966000 | 40.804672000 |
| C | 64.938028000 | 67.198099000 | 39.416220000 |
| H | 64.587852000 | 66.276513000 | 38.938542000 |
| H | 64.916989000 | 67.037556000 | 40.500717000 |
| H | 64.229202000 | 67.993410000 | 39.166314000 |
| C | 62.363476000 | 66.367999000 | 31.201856000 |
| H | 61.884723000 | 65.688755000 | 30.486411000 |
| H | 61.979490000 | 66.122562000 | 32.197371000 |
| H | 62.030269000 | 67.387120000 | 30.963301000 |
| C | 61.830353000 | 64.128503000 | 34.247834000 |
| H | 61.818325000 | 63.192514000 | 34.814911000 |
| H | 60.797824000 | 64.474703000 | 34.127817000 |
| H | 62.239075000 | 63.904468000 | 33.259483000 |
| C | 63.637433000 | 60.372281000 | 37.385575000 |
| H | 63.249764000 | 59.362787000 | 37.561202000 |
| H | 62.880412000 | 61.090965000 | 37.721541000 |
| H | 63.792350000 | 60.506535000 | 36.313968000 |
| H | 69.048802000 | 63.612870000 | 39.247580000 |
| H | 66.951587000 | 63.121271000 | 38.491373000 |
| O | 65.579898000 | 63.138558000 | 31.713248000 |
| H | 66.430921000 | 62.830336000 | 32.098082000 |
| H | 64.972049000 | 63.036369000 | 32.464512000 |

dissociative Re (-4395.606456 A.U.)

|   |              |              |              |
|---|--------------|--------------|--------------|
| C | 71.483737000 | 60.810672000 | 31.113383000 |
| O | 72.385226000 | 60.168574000 | 30.574177000 |
| N | 71.715845000 | 61.653907000 | 32.164713000 |
| H | 70.935704000 | 62.100374000 | 32.650559000 |
| C | 73.438561000 | 60.536138000 | 33.654717000 |
| O | 74.623354000 | 60.329839000 | 33.906155000 |
| N | 72.410981000 | 59.784752000 | 34.134160000 |
| H | 71.455016000 | 60.083319000 | 33.962353000 |
| C | 71.891379000 | 57.347990000 | 34.638116000 |
| O | 71.921033000 | 56.395812000 | 35.414685000 |
| N | 71.240011000 | 57.330320000 | 33.439221000 |
| H | 71.152467000 | 58.223280000 | 32.974828000 |
| C | 65.181292000 | 53.022099000 | 32.300177000 |
| H | 65.690667000 | 53.993557000 | 32.318241000 |
| H | 64.303953000 | 53.146957000 | 31.648559000 |
| C | 64.706324000 | 52.647274000 | 33.712073000 |
| H | 64.207258000 | 51.669171000 | 33.671390000 |
| H | 65.579703000 | 52.515416000 | 34.367165000 |
| C | 63.746631000 | 53.668588000 | 34.345914000 |
| H | 62.895286000 | 53.838174000 | 33.668575000 |



|   |              |              |              |
|---|--------------|--------------|--------------|
| H | 63.326683000 | 53.252188000 | 35.273189000 |
| C | 64.416778000 | 55.009640000 | 34.658024000 |
| H | 65.228665000 | 54.871411000 | 35.381119000 |
| H | 64.865058000 | 55.444175000 | 33.761642000 |
| N | 63.514351000 | 56.045920000 | 35.207988000 |
| H | 63.102567000 | 55.740577000 | 36.089666000 |
| H | 64.388547000 | 57.348860000 | 35.328576000 |
| H | 62.742705000 | 56.217627000 | 34.563690000 |
| C | 64.996163000 | 68.394657000 | 38.451215000 |
| H | 63.995640000 | 68.601573000 | 38.053760000 |
| H | 65.346966000 | 69.281361000 | 38.990991000 |
| C | 65.954185000 | 68.119664000 | 37.276540000 |
| O | 67.166020000 | 68.411571000 | 37.464461000 |
| O | 65.456318000 | 67.595094000 | 36.233325000 |
| C | 63.806037000 | 65.851230000 | 31.262316000 |
| H | 63.814519000 | 64.850671000 | 31.713743000 |
| H | 64.198127000 | 65.727504000 | 30.242949000 |
| C | 64.749575000 | 66.756301000 | 32.069287000 |
| H | 64.868410000 | 67.723293000 | 31.558521000 |
| H | 64.289240000 | 66.984364000 | 33.040569000 |
| C | 66.120445000 | 66.107929000 | 32.318455000 |
| H | 65.967030000 | 65.098576000 | 32.714479000 |
| H | 66.659910000 | 65.984159000 | 31.368250000 |
| C | 66.967751000 | 66.901000000 | 33.313538000 |
| H | 67.355508000 | 67.829122000 | 32.880200000 |
| H | 66.402317000 | 67.165694000 | 34.215099000 |
| N | 68.143801000 | 66.106960000 | 33.799375000 |
| H | 68.847714000 | 65.950259000 | 33.074263000 |
| H | 68.587078000 | 66.620912000 | 34.629028000 |
| H | 67.846289000 | 65.144360000 | 34.119853000 |
| C | 62.766791000 | 64.998025000 | 35.079238000 |
| H | 62.795664000 | 66.033879000 | 34.717994000 |
| H | 62.437833000 | 65.055329000 | 36.124135000 |
| C | 64.164603000 | 64.417211000 | 35.041856000 |
| O | 64.348265000 | 63.415760000 | 34.302109000 |
| N | 65.115606000 | 64.960031000 | 35.787005000 |
| H | 66.048907000 | 64.550649000 | 35.701515000 |
| H | 65.048685000 | 65.930163000 | 36.148693000 |
| C | 65.050083000 | 60.271008000 | 37.957671000 |
| H | 65.092278000 | 60.579128000 | 39.010490000 |
| H | 65.418898000 | 59.239704000 | 37.924148000 |
| C | 66.035308000 | 61.113781000 | 37.178742000 |
| O | 65.649778000 | 61.826644000 | 36.244386000 |
| O | 67.274572000 | 61.017275000 | 37.560861000 |

|    |              |              |              |
|----|--------------|--------------|--------------|
| C  | 69.823690000 | 60.180885000 | 40.298036000 |
| H  | 70.261545000 | 60.930948000 | 40.967577000 |
| H  | 70.249443000 | 59.203593000 | 40.541915000 |
| C  | 70.211326000 | 60.507401000 | 38.865334000 |
| O  | 70.583993000 | 59.686777000 | 38.053466000 |
| O  | 70.045061000 | 61.816789000 | 38.604078000 |
| O  | 67.369242000 | 63.600765000 | 34.633757000 |
| P  | 68.636137000 | 62.674538000 | 34.743127000 |
| O  | 68.996802000 | 62.347162000 | 36.190400000 |
| O  | 69.712425000 | 62.995149000 | 33.750587000 |
| O  | 67.746424000 | 61.248593000 | 34.228333000 |
| P  | 68.068601000 | 59.939900000 | 33.307353000 |
| O  | 67.359149000 | 60.130218000 | 31.980946000 |
| O  | 69.473852000 | 59.492243000 | 33.443907000 |
| O  | 67.084750000 | 58.829533000 | 34.153111000 |
| P  | 65.492383000 | 58.881675000 | 34.103008000 |
| O  | 64.951241000 | 60.275736000 | 33.913208000 |
| O  | 65.064763000 | 58.138053000 | 35.414871000 |
| O  | 64.961601000 | 57.871231000 | 32.959335000 |
| Mg | 65.878997000 | 62.165008000 | 34.219293000 |
| O  | 69.065169000 | 67.525061000 | 35.892240000 |
| H  | 68.274411000 | 67.904187000 | 36.415073000 |
| H  | 69.512607000 | 66.962775000 | 36.543225000 |
| C  | 64.858565000 | 58.296584000 | 31.582123000 |
| H  | 65.810167000 | 58.708232000 | 31.240900000 |
| H  | 64.592846000 | 57.403011000 | 31.013332000 |
| H  | 64.066525000 | 59.045950000 | 31.485174000 |
| C  | 66.126779000 | 51.982031000 | 31.695864000 |
| H  | 66.441199000 | 52.268419000 | 30.686157000 |
| H  | 67.031727000 | 51.870388000 | 32.304857000 |
| H  | 65.646981000 | 50.997178000 | 31.630379000 |
| C  | 70.162656000 | 56.391220000 | 33.158986000 |
| H  | 70.175610000 | 56.106194000 | 32.100704000 |
| H  | 70.322723000 | 55.503112000 | 33.773999000 |
| H  | 69.189044000 | 56.832956000 | 33.401242000 |
| C  | 72.624505000 | 58.656791000 | 35.017428000 |
| H  | 72.287608000 | 58.887524000 | 36.035803000 |
| H  | 73.699863000 | 58.465899000 | 35.053016000 |
| C  | 73.032247000 | 61.736835000 | 32.780153000 |
| H  | 73.060428000 | 62.636264000 | 33.404191000 |
| H  | 73.802025000 | 61.823016000 | 32.009715000 |
| C  | 70.034419000 | 60.698314000 | 30.637846000 |
| H  | 70.027381000 | 60.819522000 | 29.548592000 |
| H  | 69.657820000 | 59.703510000 | 30.869179000 |

|                                            |              |              |              |
|--------------------------------------------|--------------|--------------|--------------|
| H                                          | 69.371768000 | 61.435998000 | 31.089184000 |
| C                                          | 68.291731000 | 60.164470000 | 40.471282000 |
| H                                          | 67.836131000 | 59.425970000 | 39.805638000 |
| H                                          | 68.029821000 | 59.909582000 | 41.505553000 |
| H                                          | 67.866017000 | 61.141518000 | 40.230899000 |
| C                                          | 64.938053000 | 67.198047000 | 39.416267000 |
| H                                          | 65.933780000 | 66.984667000 | 39.820476000 |
| H                                          | 64.262233000 | 67.393768000 | 40.257896000 |
| H                                          | 64.583933000 | 66.295794000 | 38.902967000 |
| C                                          | 62.363490000 | 66.368004000 | 31.201870000 |
| H                                          | 61.720478000 | 65.691434000 | 30.626456000 |
| H                                          | 61.933509000 | 66.463326000 | 32.205732000 |
| H                                          | 62.313326000 | 67.356632000 | 30.727705000 |
| C                                          | 61.830354000 | 64.128633000 | 34.247869000 |
| H                                          | 61.806486000 | 63.105260000 | 34.630961000 |
| H                                          | 60.809502000 | 64.530011000 | 34.276050000 |
| H                                          | 62.149369000 | 64.081755000 | 33.205326000 |
| C                                          | 63.637406000 | 60.372278000 | 37.385585000 |
| H                                          | 62.957049000 | 59.711094000 | 37.936364000 |
| H                                          | 63.254330000 | 61.394545000 | 37.464316000 |
| H                                          | 63.626295000 | 60.090091000 | 36.333135000 |
| H                                          | 70.045919000 | 61.960600000 | 37.624656000 |
| H                                          | 67.918454000 | 61.590903000 | 36.977329000 |
| O                                          | 65.891454000 | 62.299672000 | 32.109942000 |
| H                                          | 66.485932000 | 61.515106000 | 31.888604000 |
| H                                          | 65.004371000 | 62.022847000 | 31.833109000 |
| <u>dissociative TS (-4395.571911 A.U.)</u> |              |              |              |
| C                                          | 71.494702000 | 60.998930000 | 30.984056000 |
| O                                          | 72.420952000 | 60.672987000 | 30.245128000 |
| N                                          | 71.705704000 | 61.653948000 | 32.176270000 |
| H                                          | 70.905166000 | 61.784601000 | 32.784118000 |
| C                                          | 73.449953000 | 60.537842000 | 33.655407000 |
| O                                          | 74.641717000 | 60.293843000 | 33.834677000 |
| N                                          | 72.425307000 | 59.844329000 | 34.212338000 |
| H                                          | 71.469418000 | 60.160165000 | 34.072823000 |
| C                                          | 72.017811000 | 57.355044000 | 34.456489000 |
| O                                          | 72.499650000 | 56.264518000 | 34.766941000 |
| N                                          | 70.924768000 | 57.508546000 | 33.667222000 |
| H                                          | 70.490393000 | 58.426228000 | 33.579054000 |
| C                                          | 65.321766000 | 53.241511000 | 32.029055000 |
| H                                          | 66.009711000 | 54.025769000 | 32.368647000 |
| H                                          | 64.846186000 | 53.626450000 | 31.115259000 |
| C                                          | 64.240861000 | 52.991481000 | 33.090779000 |
| H                                          | 63.590606000 | 52.173650000 | 32.749151000 |

|   |              |              |              |
|---|--------------|--------------|--------------|
| H | 64.716097000 | 52.633408000 | 34.016071000 |
| C | 63.364580000 | 54.214011000 | 33.411823000 |
| H | 62.903214000 | 54.587458000 | 32.484812000 |
| H | 62.535861000 | 53.901975000 | 34.065025000 |
| C | 64.122169000 | 55.360206000 | 34.092147000 |
| H | 64.587262000 | 55.006702000 | 35.020231000 |
| H | 64.929751000 | 55.732107000 | 33.455839000 |
| N | 63.291542000 | 56.533103000 | 34.433945000 |
| H | 62.517648000 | 56.267244000 | 35.042125000 |
| H | 64.319629000 | 57.682631000 | 34.967555000 |
| H | 62.888834000 | 56.932778000 | 33.586968000 |
| C | 65.644735000 | 68.335114000 | 38.657110000 |
| H | 64.912460000 | 69.057262000 | 38.279965000 |
| H | 66.322954000 | 68.856379000 | 39.343548000 |
| C | 66.465371000 | 67.795593000 | 37.472481000 |
| O | 67.533159000 | 67.181057000 | 37.795150000 |
| O | 66.009967000 | 67.953883000 | 36.309298000 |
| C | 63.851004000 | 66.009956000 | 31.166665000 |
| H | 63.987185000 | 64.990362000 | 31.550302000 |
| H | 64.202672000 | 65.992034000 | 30.125414000 |
| C | 64.736929000 | 66.957282000 | 31.990317000 |
| H | 64.706114000 | 67.971137000 | 31.565467000 |
| H | 64.330632000 | 67.038001000 | 33.007701000 |
| C | 66.179192000 | 66.439650000 | 32.078580000 |
| H | 66.139182000 | 65.377619000 | 32.351068000 |
| H | 66.655598000 | 66.481102000 | 31.088380000 |
| C | 67.047597000 | 67.171269000 | 33.107943000 |
| H | 67.466462000 | 68.107498000 | 32.725889000 |
| H | 66.511097000 | 67.394919000 | 34.036271000 |
| N | 68.178922000 | 66.279261000 | 33.517118000 |
| H | 68.860163000 | 66.089547000 | 32.779358000 |
| H | 68.676739000 | 66.582128000 | 34.385816000 |
| H | 67.787727000 | 65.353454000 | 33.838613000 |
| C | 62.622999000 | 65.163663000 | 35.037267000 |
| H | 62.529225000 | 66.167985000 | 34.603397000 |
| H | 62.255958000 | 65.243473000 | 36.068643000 |
| C | 64.082768000 | 64.757405000 | 35.076639000 |
| O | 64.403151000 | 63.694412000 | 34.502542000 |
| N | 64.958431000 | 65.516472000 | 35.724140000 |
| H | 65.931628000 | 65.203531000 | 35.729222000 |
| H | 64.806013000 | 66.476663000 | 36.032091000 |
| C | 65.053521000 | 60.353725000 | 37.961378000 |
| H | 65.059957000 | 60.418957000 | 39.056754000 |
| H | 65.556654000 | 59.412348000 | 37.707998000 |

|    |              |              |              |
|----|--------------|--------------|--------------|
| C  | 65.926820000 | 61.461856000 | 37.415315000 |
| O  | 65.520969000 | 62.247477000 | 36.554550000 |
| O  | 67.132196000 | 61.501242000 | 37.920677000 |
| C  | 69.823959000 | 60.175505000 | 40.310931000 |
| H  | 70.278189000 | 60.713442000 | 41.152395000 |
| H  | 70.224204000 | 59.158123000 | 40.292163000 |
| C  | 70.227850000 | 60.858319000 | 39.016578000 |
| O  | 70.681159000 | 60.293422000 | 38.044558000 |
| O  | 69.972041000 | 62.180173000 | 39.077916000 |
| O  | 67.331390000 | 64.186463000 | 34.990889000 |
| P  | 68.742874000 | 63.826242000 | 35.514786000 |
| O  | 68.826251000 | 63.285743000 | 36.917304000 |
| O  | 69.881027000 | 63.937457000 | 34.565110000 |
| O  | 67.800163000 | 61.569173000 | 34.738419000 |
| P  | 68.161830000 | 60.516502000 | 33.662786000 |
| O  | 67.562357000 | 60.860853000 | 32.291667000 |
| O  | 69.569774000 | 59.997883000 | 33.702291000 |
| O  | 67.165308000 | 59.155922000 | 34.148573000 |
| P  | 65.593294000 | 59.263352000 | 34.065850000 |
| O  | 65.062210000 | 60.677639000 | 34.078213000 |
| O  | 65.076051000 | 58.327493000 | 35.227727000 |
| O  | 65.067137000 | 58.444293000 | 32.765536000 |
| Mg | 66.059809000 | 62.529553000 | 34.556840000 |
| O  | 68.984029000 | 66.058769000 | 36.085997000 |
| H  | 68.315241000 | 66.521577000 | 36.786799000 |
| H  | 69.866134000 | 66.099933000 | 36.487996000 |
| C  | 65.157343000 | 59.039284000 | 31.453432000 |
| H  | 66.139726000 | 59.493675000 | 31.304669000 |
| H  | 64.990955000 | 58.227671000 | 30.740938000 |
| H  | 64.374471000 | 59.797039000 | 31.337056000 |
| C  | 66.126779000 | 51.982031000 | 31.695864000 |
| H  | 66.890528000 | 52.186738000 | 30.937632000 |
| H  | 66.638666000 | 51.593619000 | 32.584693000 |
| H  | 65.477747000 | 51.184730000 | 31.311703000 |
| C  | 70.162655000 | 56.391220000 | 33.158985000 |
| H  | 70.213279000 | 56.332486000 | 32.062506000 |
| H  | 70.579100000 | 55.472880000 | 33.579758000 |
| H  | 69.109133000 | 56.484893000 | 33.450866000 |
| C  | 72.624506000 | 58.656791000 | 35.017429000 |
| H  | 72.202538000 | 58.810785000 | 36.020594000 |
| H  | 73.698539000 | 58.498483000 | 35.120275000 |
| C  | 73.032248000 | 61.736835000 | 32.780153000 |
| H  | 73.087013000 | 62.645643000 | 33.390651000 |
| H  | 73.768163000 | 61.808696000 | 31.978741000 |

|                                            |              |              |              |
|--------------------------------------------|--------------|--------------|--------------|
| C                                          | 70.034419000 | 60.698315000 | 30.637845000 |
| H                                          | 69.965197000 | 60.583407000 | 29.552560000 |
| H                                          | 69.740466000 | 59.763876000 | 31.119584000 |
| H                                          | 69.339979000 | 61.459512000 | 30.988078000 |
| C                                          | 68.291732000 | 60.164471000 | 40.471281000 |
| H                                          | 67.821072000 | 59.624611000 | 39.646268000 |
| H                                          | 68.014307000 | 59.672184000 | 41.411945000 |
| H                                          | 67.896528000 | 61.182081000 | 40.475544000 |
| C                                          | 64.938053000 | 67.198047000 | 39.416267000 |
| H                                          | 65.674289000 | 66.476346000 | 39.783387000 |
| H                                          | 64.369818000 | 67.582786000 | 40.271928000 |
| H                                          | 64.239258000 | 66.660496000 | 38.763502000 |
| C                                          | 62.363490000 | 66.368004000 | 31.201870000 |
| H                                          | 61.768442000 | 65.656046000 | 30.618078000 |
| H                                          | 61.975957000 | 66.362643000 | 32.226675000 |
| H                                          | 62.182944000 | 67.368320000 | 30.787366000 |
| C                                          | 61.830354000 | 64.128633000 | 34.247869000 |
| H                                          | 61.928007000 | 63.139497000 | 34.700354000 |
| H                                          | 60.766742000 | 64.396697000 | 34.221220000 |
| H                                          | 62.189568000 | 64.054510000 | 33.219107000 |
| C                                          | 63.637404000 | 60.372277000 | 37.385585000 |
| H                                          | 63.068741000 | 59.513290000 | 37.760472000 |
| H                                          | 63.105795000 | 61.285802000 | 37.673582000 |
| H                                          | 63.669038000 | 60.326036000 | 36.297037000 |
| H                                          | 69.962387000 | 62.556948000 | 38.165307000 |
| H                                          | 67.703586000 | 62.207186000 | 37.472769000 |
| O                                          | 66.110714000 | 62.919521000 | 32.468429000 |
| H                                          | 66.730573000 | 62.125959000 | 32.247385000 |
| H                                          | 65.227243000 | 62.626531000 | 32.196012000 |
| <u>dissociative Pr (-4395.627973 A.U.)</u> |              |              |              |
| C                                          | 71.439798000 | 60.698646000 | 31.238746000 |
| O                                          | 72.279364000 | 59.863143000 | 30.894248000 |
| N                                          | 71.711970000 | 61.663092000 | 32.164237000 |
| H                                          | 70.968042000 | 62.287596000 | 32.504664000 |
| C                                          | 73.432547000 | 60.504089000 | 33.608422000 |
| O                                          | 74.614164000 | 60.202665000 | 33.743581000 |
| N                                          | 72.401632000 | 59.821991000 | 34.184820000 |
| H                                          | 71.473740000 | 60.231359000 | 34.159367000 |
| C                                          | 71.764692000 | 57.427681000 | 34.704777000 |
| O                                          | 71.706252000 | 56.509705000 | 35.521167000 |
| N                                          | 71.093527000 | 57.444073000 | 33.527565000 |
| H                                          | 71.303333000 | 58.180631000 | 32.865121000 |
| C                                          | 65.088329000 | 53.099723000 | 31.829220000 |
| H                                          | 65.602194000 | 54.053963000 | 31.999658000 |

|   |              |              |              |
|---|--------------|--------------|--------------|
| H | 64.546564000 | 53.209059000 | 30.878145000 |
| C | 64.077405000 | 52.825421000 | 32.952523000 |
| H | 63.652946000 | 51.821213000 | 32.808794000 |
| H | 64.603116000 | 52.795758000 | 33.918383000 |
| C | 62.918889000 | 53.831667000 | 33.032367000 |
| H | 62.414794000 | 53.880433000 | 32.054661000 |
| H | 62.168076000 | 53.461188000 | 33.747336000 |
| C | 63.331493000 | 55.247132000 | 33.450827000 |
| H | 63.815221000 | 55.226742000 | 34.434427000 |
| H | 64.055554000 | 55.682280000 | 32.756516000 |
| N | 62.193253000 | 56.191170000 | 33.538341000 |
| H | 61.492457000 | 55.841690000 | 34.192545000 |
| H | 62.597027000 | 57.738412000 | 33.810906000 |
| H | 61.730509000 | 56.257676000 | 32.630552000 |
| C | 66.126015000 | 66.238711000 | 39.307004000 |
| H | 67.028272000 | 66.671990000 | 39.759126000 |
| H | 65.943982000 | 65.307686000 | 39.857490000 |
| C | 66.471855000 | 65.865148000 | 37.873497000 |
| O | 67.410966000 | 64.928043000 | 37.820252000 |
| O | 65.933818000 | 66.389554000 | 36.907066000 |
| C | 63.465376000 | 66.250729000 | 30.139309000 |
| H | 63.192267000 | 65.460769000 | 29.424451000 |
| H | 63.519868000 | 67.181017000 | 29.555319000 |
| C | 64.847598000 | 65.937402000 | 30.731794000 |
| H | 65.158952000 | 66.767113000 | 31.384591000 |
| H | 64.759619000 | 65.055776000 | 31.378649000 |
| C | 65.928126000 | 65.685781000 | 29.669015000 |
| H | 65.645069000 | 64.810630000 | 29.066300000 |
| H | 65.970457000 | 66.540145000 | 28.977837000 |
| C | 67.335708000 | 65.455640000 | 30.238302000 |
| H | 68.024486000 | 65.239329000 | 29.413461000 |
| H | 67.693042000 | 66.383354000 | 30.715727000 |
| N | 67.370306000 | 64.315949000 | 31.167504000 |
| H | 66.479097000 | 62.912262000 | 30.999865000 |
| H | 68.324788000 | 64.059273000 | 31.438600000 |
| H | 66.942695000 | 64.560205000 | 32.059447000 |
| C | 63.066333000 | 64.966207000 | 34.564441000 |
| H | 63.008299000 | 65.947474000 | 34.075545000 |
| H | 63.141216000 | 65.174065000 | 35.639479000 |
| C | 64.358478000 | 64.297625000 | 34.114696000 |
| O | 64.321119000 | 63.305367000 | 33.351566000 |
| N | 65.505964000 | 64.838333000 | 34.525148000 |
| H | 66.347303000 | 64.281539000 | 34.326602000 |
| H | 65.550014000 | 65.527003000 | 35.274131000 |

|    |              |              |              |
|----|--------------|--------------|--------------|
| C  | 65.043486000 | 59.796736000 | 37.207056000 |
| H  | 65.621368000 | 59.829223000 | 38.136829000 |
| H  | 64.990025000 | 58.736666000 | 36.922597000 |
| C  | 65.857599000 | 60.485643000 | 36.124962000 |
| O  | 65.305912000 | 61.160487000 | 35.245133000 |
| O  | 67.136634000 | 60.270011000 | 36.237236000 |
| C  | 69.016070000 | 61.402389000 | 39.924759000 |
| H  | 68.380044000 | 62.291670000 | 39.961865000 |
| H  | 69.905021000 | 61.605115000 | 40.537477000 |
| C  | 69.490129000 | 61.177354000 | 38.491307000 |
| O  | 70.110929000 | 60.189994000 | 38.147800000 |
| O  | 69.140729000 | 62.183828000 | 37.686283000 |
| O  | 67.195931000 | 62.854338000 | 33.656489000 |
| P  | 68.636676000 | 62.913105000 | 34.221349000 |
| O  | 68.973446000 | 61.676628000 | 35.079175000 |
| O  | 69.684082000 | 63.375293000 | 33.220036000 |
| O  | 66.585066000 | 59.821022000 | 32.941167000 |
| P  | 66.335751000 | 58.729373000 | 31.912356000 |
| O  | 66.216396000 | 59.422888000 | 30.448829000 |
| O  | 67.074215000 | 57.445969000 | 31.870385000 |
| O  | 64.678966000 | 58.268671000 | 32.162571000 |
| P  | 63.486819000 | 59.259898000 | 32.515619000 |
| O  | 63.859841000 | 60.711013000 | 32.533241000 |
| O  | 62.806897000 | 58.750709000 | 33.839334000 |
| O  | 62.363722000 | 58.916385000 | 31.396216000 |
| Mg | 65.668581000 | 61.618283000 | 33.233761000 |
| O  | 68.497330000 | 64.223528000 | 35.320512000 |
| H  | 67.670667000 | 64.668614000 | 36.891893000 |
| H  | 69.309535000 | 64.744297000 | 35.218007000 |
| C  | 62.663634000 | 59.240262000 | 30.027482000 |
| H  | 63.673303000 | 58.915860000 | 29.757203000 |
| H  | 61.926391000 | 58.716232000 | 29.414630000 |
| H  | 62.569505000 | 60.319786000 | 29.869491000 |
| C  | 66.126779000 | 51.982031000 | 31.695864000 |
| H  | 66.839615000 | 52.196678000 | 30.892291000 |
| H  | 66.701311000 | 51.863466000 | 32.622631000 |
| H  | 65.649013000 | 51.018540000 | 31.475026000 |
| C  | 70.162653000 | 56.391218000 | 33.158985000 |
| H  | 70.612638000 | 55.685331000 | 32.446071000 |
| H  | 69.909407000 | 55.845267000 | 34.069335000 |
| H  | 69.255162000 | 56.815695000 | 32.718967000 |
| C  | 72.624507000 | 58.656793000 | 35.017428000 |
| H  | 72.436879000 | 58.884157000 | 36.074089000 |
| H  | 73.681117000 | 58.393155000 | 34.918024000 |



|   |              |              |              |
|---|--------------|--------------|--------------|
| C | 73.032248000 | 61.736835000 | 32.780155000 |
| H | 73.045072000 | 62.618596000 | 33.429478000 |
| H | 73.813698000 | 61.849662000 | 32.023202000 |
| C | 70.034418000 | 60.698313000 | 30.637845000 |
| H | 70.117334000 | 60.858726000 | 29.557439000 |
| H | 69.577513000 | 59.715358000 | 30.787733000 |
| H | 69.385180000 | 61.462281000 | 31.073997000 |
| C | 68.291731000 | 60.164470000 | 40.471282000 |
| H | 68.930811000 | 59.282824000 | 40.369318000 |
| H | 68.030686000 | 60.293721000 | 41.528248000 |
| H | 67.368046000 | 59.971969000 | 39.913498000 |
| C | 64.938053000 | 67.198047000 | 39.416267000 |
| H | 64.032262000 | 66.750429000 | 38.995283000 |
| H | 64.743485000 | 67.448167000 | 40.464846000 |
| H | 65.131130000 | 68.124004000 | 38.866842000 |
| C | 62.363490000 | 66.368004000 | 31.201870000 |
| H | 61.396565000 | 66.617326000 | 30.748266000 |
| H | 62.245742000 | 65.426627000 | 31.744918000 |
| H | 62.599417000 | 67.152797000 | 31.931498000 |
| C | 61.830354000 | 64.128633000 | 34.247869000 |
| H | 61.858595000 | 63.175175000 | 34.783991000 |
| H | 60.918567000 | 64.663838000 | 34.537576000 |
| H | 61.773625000 | 63.889473000 | 33.183932000 |
| C | 63.637406000 | 60.372278000 | 37.385585000 |
| H | 63.098252000 | 59.823478000 | 38.166388000 |
| H | 63.676164000 | 61.427651000 | 37.676700000 |
| H | 63.072887000 | 60.299663000 | 36.452203000 |
| H | 69.307532000 | 61.949934000 | 36.722750000 |
| H | 67.750132000 | 60.790863000 | 35.593183000 |
| O | 65.863742000 | 62.094812000 | 31.105868000 |
| H | 66.174932000 | 60.404028000 | 30.555415000 |
| H | 64.962239000 | 62.390676000 | 30.902438000 |

# Energy corrections of reactants, transition structures and products

## 1. Model<sub>1-wat</sub> for AceK

|              |    | $E_{\text{opt}}$ | $\Delta E_{\text{freq}}$ | $\Delta E_{\text{basis set}}$ | $\Delta E_{\text{CPCM}}$ | $\Delta E_{\text{D2}}$ | $E_{\text{correct}}$ |
|--------------|----|------------------|--------------------------|-------------------------------|--------------------------|------------------------|----------------------|
| associative  | Re | -4126.553941     | 1.018049                 | -1.350113                     | -0.069784                | -0.211226              | -4127.167015         |
|              | TS | -4126.511088     | 1.014814                 | -1.352055                     | -0.071181                | -0.206113              | -4127.125624         |
|              | Pr | -4126.580031     | 1.019118                 | -1.352713                     | -0.074884                | -0.203390              | -4127.191900         |
| dissociative | Re | -4126.535051     | 1.017648                 | -1.353783                     | -0.076600                | -0.205684              | -4127.153471         |
|              | TS | -4126.520042     | 1.016886                 | -1.350666                     | -0.078837                | -0.205912              | -4127.138570         |
|              | Pr | -4126.569152     | 1.017796                 | -1.356364                     | -0.080378                | -0.193968              | -4127.182066         |

## 2. Model<sub>2-wat</sub> for AceK

|              |    | $E_{\text{opt}}$ | $\Delta E_{\text{freq}}$ | $\Delta E_{\text{basis set}}$ | $\Delta E_{\text{CPCM}}$ | $\Delta E_{\text{D2}}$ | $E_{\text{correct}}$ |
|--------------|----|------------------|--------------------------|-------------------------------|--------------------------|------------------------|----------------------|
| associative  | Re | -4202.981235     | 1.046632                 | -1.397075                     | -0.077244                | -0.209356              | -4203.618278         |
|              | TS | -4202.923531     | 1.042836                 | -1.396180                     | -0.075797                | -0.210317              | -4203.562989         |
|              | Pr | -4202.996976     | 1.046910                 | -1.395400                     | -0.075377                | -0.213185              | -4203.634028         |
| dissociative | Re | -4202.970481     | 1.046996                 | -1.392363                     | -0.076575                | -0.216090              | -4203.608513         |
|              | TS | -4202.936471     | 1.043389                 | -1.395292                     | -0.080744                | -0.215252              | -4203.584369         |
|              | Pr | -4202.963656     | 1.043444                 | -1.400138                     | -0.078808                | -0.210679              | -4203.609837         |

## 3. Two-lytic-water model for AceK

|              |    | $E_{\text{opt}}$ | $\Delta E_{\text{freq}}$ | $\Delta E_{\text{basis set}}$ | $\Delta E_{\text{CPCM}}$ | $\Delta E_{\text{D2}}$ | $E_{\text{correct}}$ |
|--------------|----|------------------|--------------------------|-------------------------------|--------------------------|------------------------|----------------------|
| associative  | Re | -4202.986110     | 1.045435                 | -1.391619                     | -0.073387                | -0.219608              | -4203.625289         |
|              | TS | -4202.938312     | 1.042343                 | -1.389669                     | -0.071257                | -0.218661              | -4203.575555         |
|              | Pr | -4203.028345     | 1.046283                 | -1.392196                     | -0.075710                | -0.211472              | -4203.661440         |
| dissociative | Re | -4202.985920     | 1.046214                 | -1.391519                     | -0.072069                | -0.218739              | -4203.622033         |
|              | TS | -4202.948299     | 1.044330                 | -1.393226                     | -0.076207                | -0.217887              | -4203.591290         |
|              | Pr | -4203.014493     | 1.044352                 | -1.397709                     | -0.073434                | -0.203872              | -4203.645155         |

#### 4. Double Mg<sup>2+</sup> model for AceK

|              |    | E <sub>opt</sub> | ΔE <sub>freq</sub> | ΔE <sub>basis set</sub> | ΔE <sub>CPCM</sub> | ΔE <sub>D2</sub> | E <sub>correct</sub> |
|--------------|----|------------------|--------------------|-------------------------|--------------------|------------------|----------------------|
|              | Re | -4555.828934     | 1.102274           | -1.468669               | -0.085336          | -0.234650        | -4556.515315         |
| associative  | TS | -4555.772486     | 1.099608           | -1.466398               | -0.085074          | -0.237116        | -4556.461466         |
|              | Pr | -4555.846460     | 1.100496           | -1.469561               | -0.089984          | -0.233309        | -4556.538818         |
|              | Re | -4555.854524     | 1.105563           | -1.462466               | -0.076545          | -0.246649        | -4556.534621         |
| dissociative | TS | -4555.806619     | 1.101817           | -1.461849               | -0.076148          | -0.245356        | -4556.488156         |
|              | Pr | -4555.866443     | 1.102070           | -1.466821               | -0.080396          | -0.230050        | -4556.541640         |

#### 5. Model for AceK-ICDH

|              |    | E <sub>opt</sub> | ΔE <sub>freq</sub> | ΔE <sub>basis set</sub> | ΔE <sub>CPCM</sub> | ΔE <sub>D2</sub> | E <sub>correct</sub> |
|--------------|----|------------------|--------------------|-------------------------|--------------------|------------------|----------------------|
|              | Re | -4394.953321     | 1.111220           | -1.458405               | -0.077742          | -0.225801        | -4395.604049         |
| associative  | TS | -4394.910198     | 1.109544           | -1.460130               | -0.077234          | -0.222516        | -4395.560534         |
|              | Pr | -4394.983287     | 1.113288           | -1.457886               | -0.077118          | -0.222028        | -4395.627029         |
|              | Re | -4394.952559     | 1.112495           | -1.461792               | -0.081801          | -0.222798        | -4395.606456         |
| dissociative | TS | -4394.917190     | 1.111231           | -1.459596               | -0.083895          | -0.222461        | -4395.571911         |
|              | Pr | -4394.982817     | 1.109172           | -1.465105               | -0.080869          | -0.208354        | -4395.627973         |
